# Supplementary material
Source: PubMed Central journal article supplement (PMC3393786)
Supplement: NIHMS375369-supplement-2.pdf [file NIHMS375369-supplement-2.pdf]

# Direct and Highly Regioselective and Enantioselective Allylation of $\beta$ -Diketones

Wesley A. Chalifoux, Samuel K. Reznik, and James L. Leighton\*

*Department of Chemistry, Columbia University, New York, NY, 10027*

## Supplementary Methods

**General Information.**  $\beta$ -Diketones were purchased from commercial sources or synthesized using a known procedure.<sup>31</sup> All reactions were carried out under an atmosphere of nitrogen in flame or oven-dried glassware with magnetic stirring unless otherwise indicated. Degassed solvents were purified by passage through an activated alumina column. Anhydrous chloroform was purchased from Aldrich. Thin-layer chromatography (TLC) was carried out on glass backed silica gel XHL TLC plates (250  $\mu$ m) from Sorbent Technologies; visualization by UV light, phosphomolybdic acid (PMA) stain or potassium permanganate (KMnO<sub>4</sub>) stain. Gas chromatographic analyses were performed on a Hewlett-Packard 6890 Series Gas Chromatograph equipped with a capillary split-splitless inlet and flame ionization detector with electronic pneumatics control using either a Supelco  $\beta$ -Dex 120 (30 m x 0.25 mm) or Supelco  $\beta$ -Dex 325 (30 m x 0.25 mm) capillary GLC column. HPLC analysis was carried out on an Agilent 1200 Series using either a Chiralpak AD-H (250 x 4.5 mm ID) column or Chiralcel OD (250 x 4.5 mm ID) column. <sup>1</sup>H NMR spectra were recorded on a Bruker DPX-300 (300 MHz), Bruker DRX-300 (300 MHz), Bruker AVIII nano bay-400 (400 MHz), or a Bruker AVIII single bay-400 (400 MHz) spectrometer and are reported in ppm from CDCl<sub>3</sub> internal standard (7.26 ppm). Data are reported as follows: (bs= broad singlet, s = singlet, d = doublet, t = triplet, q = quartet, quin = quintet, sep = septet, m = multiplet, dd = doublet of doublets, ddd = doublet of doublet of doublets, dddd = doublet of doublet of doublet of doublets; coupling constant(s) in Hz; integration). Proton decoupled <sup>13</sup>C NMR spectra were recorded on a Bruker DRX-300 (300 MHz) or a Bruker AVIII single bay-400 (400 MHz) spectrometer and are reported in ppm from CDCl<sub>3</sub> internal standard (77.0 ppm). Infrared spectra were recorded on a Nicolet Avatar 370DTGS FT-IR. Optical rotations were recorded on a Jasco DIP-1000 digital polarimeter. (APCI)-MS was conducted on a JMS-LCmate LCMS (JEOL).

## General procedure 1: Allylation and crotylation with *E*-crotylsilane

To a solution of  $\beta$ -diketone (1.0 equiv) in anhydrous CHCl<sub>3</sub> (0.05-0.10 M) was added (*S,S*)-allylsilane **3**<sup>32</sup> (1.2 equiv) or (*S,S*)-*E*-crotylsilane **20**<sup>33</sup> (1.3 equiv) and the resulting mixture was allowed to stir at 23 °C until the reaction was deemed complete by <sup>1</sup>H NMR spectroscopy. The reaction mixture was cooled to -40 °C, TBAF (4.0-4.5 equiv, 1M in THF) was added, and the mixture was stirred at -40 °C for 1 h. Saturated NH<sub>4</sub>Cl was added, the mixture warmed to

<sup>31</sup> Heller, S.; Natarajan, S. R. *Org. Lett.* **2006**, *8*, 2675.

<sup>32</sup> Kubota, K.; Leighton, J. L. *Angew. Chem. Int. Ed.* **2003**, *42*, 946.

<sup>33</sup> Hackman, B. M.; Lombardi, P. J.; Leighton, J. L. *Org. Lett.* **2004**, *6*, 4375.

ambient temperature, and extracted with CH<sub>2</sub>Cl<sub>2</sub>. The organic phases were combined, washed with H<sub>2</sub>O, brine, and dried over MgSO<sub>4</sub>. The mixture was filtered, concentrated in vacuo, and the crude product purified by column chromatography (silica gel).

### General procedure 2: Crotylation using *Z*-crotylsilane

To a solution of (*S,S*)-*Z*-crotylsilane **21**<sup>32</sup> (1.3 equiv) in anhydrous CHCl<sub>3</sub> (0.05-0.1 M) was added AgOTf (1.3 equiv) and the resulting mixture was allowed to stir at 23 °C for 20-30 min to allow the silyl triflate to form. To this mixture was added β-diketone (1.0 equiv) and the reaction was stirred at 23 °C for 40-70 h. The reaction mixture was cooled to -40 °C and TBAF (4.5 equiv, 1M in THF) was added and the mixture was stirred at -40 °C for 1 h. Saturated NH<sub>4</sub>Cl was added, the mixture warmed to ambient temperature, and extracted with CH<sub>2</sub>Cl<sub>2</sub>. The organic phases were combined, washed with H<sub>2</sub>O, brine and dried over MgSO<sub>4</sub>. The mixture was filtered, concentrated in vacuo and the crude product purified by column chromatography (silica gel).

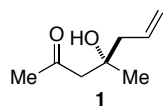

**Compound 1:** This reaction was performed according to general procedure 1 (9.99 mmol of acetylacetone in CHCl<sub>3</sub> at 23 °C for 1 h). Purification by flash chromatography (gradient 10%-50% Et<sub>2</sub>O/pentane) afforded **1** (1.03 g, 72% yield) as a pale yellow liquid. The enantiomeric excess of **1** was determined to be 89% by chiral GC (see GC trace below). [ $\alpha$ ]<sub>D</sub> = -5.5° (c 4.7, CH<sub>2</sub>Cl<sub>2</sub>); R<sub>f</sub> = 0.38 (30% Et<sub>2</sub>O/pentane); <sup>1</sup>H NMR (400 MHz, CDCl<sub>3</sub>) δ 5.81 (dddd, *J* = 17.5 Hz, 10.2 Hz, 7.4 Hz, 7.4 Hz, 1H), 5.11-5.01 (m, 2H), 3.80 (bs, 1H), 2.64 (d, *J* = 17.2 Hz, 1H), 2.52 (d, *J* = 17.2 Hz, 1H), 2.32-2.20 (m, 2H), 2.15 (s, 3H), 1.20 (s, 3H); <sup>13</sup>C NMR (100 MHz, CDCl<sub>3</sub>) δ 210.9, 134.0, 118.3, 71.3, 51.7, 46.6, 31.8, 26.9; IR (neat) 3459, 3077, 2977, 2932, 1702, 1641 cm<sup>-1</sup>; APCI LRMS *m/z* 143.04 ([M+H]<sup>+</sup>, 20), 125.04 ([M-OH]<sup>+</sup>, 100).

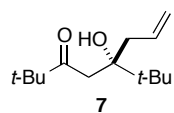

**Compound 7:** This reaction was performed according to general procedure 1 (0.21 mmol of 2,2,6,6-tetramethylhepta-3,5-dione in CHCl<sub>3</sub> at 23 °C for 18 h). Purification by flash chromatography (5% EtOAc/hexanes) afforded **7** (40 mg, 83% yield) as a colorless oil. The enantiomeric excess of **7** was determined to be 87% by chiral GC (see GC trace below). [ $\alpha$ ]<sub>D</sub> = +36.0° (c 1.6, CH<sub>2</sub>Cl<sub>2</sub>); R<sub>f</sub> = 0.45 (5% EtOAc/hexanes); <sup>1</sup>H NMR (300 MHz, CDCl<sub>3</sub>) δ 5.90 (dddd, *J* = 16.5 Hz, 10.5 Hz, 8.6 Hz, 6.0 Hz, 1H), 5.28 (s, 1H), 5.05-4.95 (m, 2H), 2.76 (d, *J* = 18.1 Hz, 1H), 2.64 (d, *J* = 18.1 Hz, 1H), 2.52 (dddd, *J* = 14.3 Hz, 6.0 Hz, 1.6 Hz, 1.6 Hz, 1H), 2.21 (dd, *J* = 14.3 Hz, 8.6 Hz, 1H), 1.15 (s, 9H), 0.95 (s, 9H); <sup>13</sup>C NMR (75 MHz, CDCl<sub>3</sub>) δ 220.6, 136.3, 117.1, 77.6, 45.4, 41.7, 39.0, 37.4, 26.7, 25.7; IR (cast film) 3439, 3075, 2964, 2876, 1688, 1638 cm<sup>-1</sup>; APCI LRMS *m/z* 227.38 ([M+H]<sup>+</sup>, 25), 209.35 ([M-OH]<sup>+</sup>, 100).

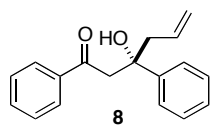

**Compound 8:** This reaction was performed according to general procedure 1 (0.24 mmol of 1,3-diphenyl-1,3-propanedione in CHCl<sub>3</sub> at 23 °C for 13 h). Purification by flash chromatography (10% EtOAc/hexanes) afforded **8** (51 mg, 80% yield) as a off-white solid. The enantiomeric excess of **8** was determined to be 96% by chiral HPLC (see HPLC trace below). [ $\alpha$ ]<sub>D</sub> = +83.7° (c 3.5, CH<sub>2</sub>Cl<sub>2</sub>); R<sub>f</sub> = 0.36 (1:6 EtOAc/hexanes); <sup>1</sup>H NMR (400 MHz, CDCl<sub>3</sub>) δ 7.92-7.87 (m, 2H), 7.61-7.54 (m,

1H), 7.48-7.41 (m, 4H), 7.34-7.27 (m, 2H), 7.23-7.17 (m, 1H), 5.81-5.68 (m, 1H), 5.12-5.05 (m, 2H), 4.85 (s, 1H), 3.84 (d,  $J = 17.4$  Hz, 1H), 3.33 (d,  $J = 17.4$  Hz, 1H), 2.71-2.57 (m, 2H);  $^{13}\text{C}$  NMR (100 MHz,  $\text{CDCl}_3$ )  $\delta$  201.5, 146.0, 137.1, 133.7, 133.6, 128.7, 128.2, 128.1, 126.7, 124.9, 118.4, 75.4, 48.1, 46.6; IR (cast film) 3480, 3063, 3027, 2978, 2904, 1669, 1597, 1448, 1215  $\text{cm}^{-1}$ ; APCI LRMS  $m/z$  249.22 ( $[\text{M}-\text{OH}]^+$ , 100).

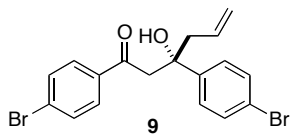

**Compound 9:** This reaction was performed according to general procedure 1 (0.23 mmol of bis(*p*-bromobenzoyl)methane in  $\text{CHCl}_3$  at 23  $^\circ\text{C}$  for 19 h) Purification by flash chromatography (15% EtOAc/hexanes) afforded **9** (64 mg, 68% yield) as a pale yellow solid.

The enantiomeric excess of **9** was determined to be 95% by chiral HPLC (see HPLC trace below).  $[\alpha]_{\text{D}} = +106.9^\circ$  (c 3.2,  $\text{CH}_2\text{Cl}_2$ );  $R_f = 0.28$  (15% EtOAc/hexanes);  $^1\text{H}$  NMR (400 MHz,  $\text{CDCl}_3$ )  $\delta$  7.76-7.71 (m, 2H), 7.62-7.57 (m, 2H), 7.44-7.39 (m, 2H), 7.31-7.27 (m, 2H), 5.70 (dddd,  $J = 17.9$  Hz, 10.4 Hz, 7.4 Hz, 7.4 Hz, 1H), 5.12-5.03 (m, 2H), 4.68 (s, 1H), 3.73 (d,  $J = 17.4$  Hz, 1H), 3.27 (d,  $J = 17.4$  Hz, 1H), 2.65-2.52 (m, 2H);  $^{13}\text{C}$  NMR (100 MHz,  $\text{CDCl}_3$ )  $\delta$  200.1, 145.0, 135.6, 132.9, 132.1, 131.3, 129.6, 129.2, 126.8, 120.9, 119.0, 75.2, 47.9, 46.5; IR (cast film) 3483, 3074, 2976, 2905, 1672, 1585  $\text{cm}^{-1}$ ; APCI LRMS  $m/z$  406.77 ( $[\text{M}-\text{OH}]^+$ , 75), 224.91 ( $[\text{M}-\text{C}_8\text{H}_6\text{BrO}]^+$ , 25), 147.05 ( $[\text{M}-\text{C}_8\text{H}_6\text{Br}_2\text{O}]^+$ , 100).

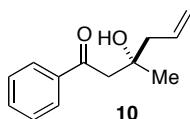

**Compound 10:** This reaction was performed according to general procedure 1 (0.16 mmol of benzoylacetone and in  $\text{CHCl}_3$  at 23  $^\circ\text{C}$  for 21 h). Purification by flash chromatography (1:4 EtOAc/hexanes) afforded **10** (26 mg, 81% yield) as an orange oil consisting of a mixture of regioisomers. The regioselectivity was

determined by  $^1\text{H}$  NMR to be 19:1. The enantiomeric excess of **10** was determined to be 97% by chiral HPLC (see HPLC trace below).  $[\alpha]_{\text{D}} = -19.7^\circ$  (c 1.9,  $\text{CH}_2\text{Cl}_2$ );  $R_f = 0.42$  (1:4 EtOAc/hexanes);  $^1\text{H}$  NMR (400 MHz,  $\text{CDCl}_3$ )  $\delta$  7.97-7.91 (m, 2H), 7.62-7.56 (m, 1H), 7.51-7.44 (m, 2H), 5.89 (dddd,  $J = 17.6$  Hz, 10.2 Hz, 7.4 Hz, 7.4 Hz, 1H), 5.13-5.03 (m, 2H), 4.18 (s, 1H), 3.17 (d,  $J = 17.2$  Hz, 1H), 3.07 (d,  $J = 17.2$  Hz, 1H), 2.45-2.33 (m, 2H), 1.31 (s, 3H);  $^{13}\text{C}$  NMR (100 MHz,  $\text{CDCl}_3$ )  $\delta$  201.9, 137.3, 134.1, 133.6, 128.7, 128.1, 118.4, 71.8, 46.8, 46.5, 27.2; IR (cast film) 3478, 3072, 2976, 2931, 1670, 1597, 1580, 1214  $\text{cm}^{-1}$ ; APCI LRMS  $m/z$  205.23 ( $[\text{M}+\text{H}]^+$ , 100), 187.19 ( $[\text{M}-\text{OH}]^+$ , 95).

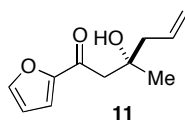

**Compound 11:** This reaction was performed according to general procedure 1 (0.51 mmol of furoylacetone and in  $\text{CHCl}_3$  at 23  $^\circ\text{C}$  for 24 h). Purification by flash chromatography (gradient 25%-50% EtOAc/hexanes) afforded **11** (68 mg, 68% yield) as a yellow oil. The regioselectivity was determined by  $^1\text{H}$  NMR to

be >20:1. The enantiomeric excess of **11** was determined to be 95% by chiral HPLC (see HPLC trace below).  $[\alpha]_{\text{D}} = -23.4^\circ$  (c 3.6,  $\text{CH}_2\text{Cl}_2$ );  $R_f = 0.28$  (1:2 EtOAc/hexanes);  $^1\text{H}$  NMR (300 MHz,  $\text{CDCl}_3$ )  $\delta$  7.60 (dd,  $J = 1.7$  Hz, 0.7 Hz, 1H), 7.23 (dd,  $J = 3.6$  Hz, 0.6 Hz, 1H), 6.56 (dd,  $J = 3.6$  Hz, 1.7 Hz, 1H), 5.88 (dddd,  $J = 17.6$  Hz, 10.3 Hz, 7.4 Hz, 7.4 Hz, 1H), 5.14-5.02 (m, 2H), 3.88 (s, 1H), 3.03 (d,  $J = 16.4$  Hz, 1H), 2.94 (d,  $J = 16.4$  Hz, 1H), 2.43-2.29 (m, 2H), 1.29 (s, 3H);  $^{13}\text{C}$  NMR (100 MHz,  $\text{CDCl}_3$ )  $\delta$  190.1, 152.9, 147.0, 133.9, 118.5, 118.0, 112.5, 71.9, 46.8, 46.6, 27.1; IR (cast film) 3478, 3132, 3076, 2976, 2931, 1660, 1567, 1468  $\text{cm}^{-1}$ ; APCI LRMS  $m/z$  195.57 ( $[\text{M}+\text{H}]^+$ , 100), 177.58 ( $[\text{M}-\text{OH}]^+$ , 50).

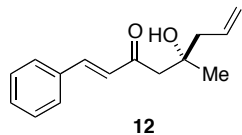

**Compound 12:** This reaction was performed according to general procedure 1 (0.35 mmol of (*E*)-6-phenylhex-5-ene-2,4-dione in  $\text{CHCl}_3$  at 23 °C for 16 h). Purification by flash chromatography (1:4 EtOAc/hexanes) afforded **12** (60 mg, 75% yield) as an orange oil. The regioselectivity was determined by

$^1\text{H}$  NMR of the crude product mixture to be > 20:1. The enantiomeric excess of **12** was determined to be 97% by chiral HPLC (see HPLC trace below).  $[\alpha]_{\text{D}} = -22.6^\circ$  (c 4.1,  $\text{CH}_2\text{Cl}_2$ );  $R_f = 0.28$  (1:4 EtOAc/hexanes);  $^1\text{H}$  NMR (400 MHz,  $\text{CDCl}_3$ )  $\delta$  7.60-7.53 (m, 3H), 7.44-7.37 (m, 3H), 6.73 (d,  $J = 16.2$  Hz, 1H), 5.89 (dddd,  $J = 17.5$  Hz, 10.2 Hz, 7.4 Hz, 7.4 Hz, 1H), 5.15-5.05 (m, 2H), 4.09 (s, 1H), 2.88 (d,  $J = 16.7$  Hz, 1H), 2.77 (d,  $J = 16.6$  Hz, 1H), 2.42-2.28 (m, 2H), 1.28 (s, 3H);  $^{13}\text{C}$  NMR (75 MHz,  $\text{CDCl}_3$ )  $\delta$  201.7, 143.7, 134.1, 134.1, 130.9, 129.0, 128.5, 126.8, 118.4, 71.8, 48.9, 46.8, 27.1; IR (cast film) 3463, 3074, 2975, 2930, 1677, 1640, 1605, 1576  $\text{cm}^{-1}$ ; APCI LRMS  $m/z$  231.19 ( $[\text{M}+\text{H}]^+$ , 70), 213.17 ( $[\text{M}-\text{OH}]^+$ , 10), 147.13 ( $[\text{M}-\text{C}_5\text{H}_8\text{O}+\text{H}]^+$ , 100).

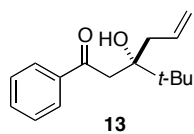

**Compound 13:** This reaction was performed according to general procedure 1 (0.33 mmol of 4,4-dimethyl-1-phenylpenta-1,3-dione in  $\text{CHCl}_3$  at 23 °C for 16 h). Purification by flash chromatography (5% EtOAc/hexanes) afforded **13** (64 mg, 79% yield) as a pale orange oil. The regioselectivity was determined by  $^1\text{H}$

NMR of the crude product mixture to be 16:1. The enantiomeric excess of **13** was determined to be 98% by chiral HPLC (see HPLC trace below).  $[\alpha]_{\text{D}} = +26.7^\circ$  (c 2.5,  $\text{CH}_2\text{Cl}_2$ );  $R_f = 0.34$  (5% EtOAc/hexanes);  $^1\text{H}$  NMR (400 MHz,  $\text{CDCl}_3$ )  $\delta$  7.95-7.90 (m, 2H), 7.61-7.55 (m, 1H), 7.50-7.44 (m, 2H), 5.92 (dddd,  $J = 16.8$  Hz, 10.2 Hz, 8.8 Hz, 5.9 Hz, 1H), 5.27 (s, 1H), 4.99-4.90 (m, 2H), 3.19 (d,  $J = 16.8$  Hz, 1H), 3.07 (d,  $J = 16.8$  Hz, 1H), 2.58 (dddd,  $J = 14.1$  Hz, 5.9 Hz, 1.4 Hz, 1.4 Hz, 1H), 2.31 (dd,  $J = 14.1$  Hz, 8.8 Hz, 1H), 1.01 (s, 9H);  $^{13}\text{C}$  NMR (100 MHz,  $\text{CDCl}_3$ )  $\delta$  204.2, 137.7, 136.1, 133.5, 128.7, 128.1, 117.8, 78.6, 41.7, 39.3, 39.0, 25.8; IR (cast film) 3432, 3073, 2958, 2876, 1665, 1597, 1209  $\text{cm}^{-1}$ ; APCI LRMS  $m/z$  247.34 ( $[\text{M}+\text{H}]^+$ , 80), 229.36 ( $[\text{M}-\text{OH}]^+$ , 100).

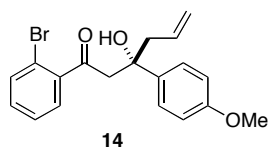

**Compound 14:** This reaction was performed according to general procedure 1 (0.19 mmol of 1-(1-bromophenyl)-3-(4-methoxyphenyl)-1,3-propanedione in  $\text{CHCl}_3$  at 23 °C for 21 h). Purification by flash chromatography (1:4 EtOAc/hexanes) afforded **14** (56 mg, 80% yield) as a pale yellow oil. The regioselectivity was determined by  $^1\text{H}$  NMR

analysis of the crude product mixture to be 18:1 (see HMBC spectrum below). The enantiomeric excess of **14** was determined to be 94% by chiral HPLC (see HPLC trace below).  $[\alpha]_{\text{D}} = +34.9^\circ$  (c 3.7,  $\text{CH}_2\text{Cl}_2$ );  $R_f = 0.34$  (25% EtOAc/hexanes);  $^1\text{H}$  NMR (400 MHz,  $\text{CDCl}_3$ )  $\delta$  7.60-7.53 (m, 1H), 7.34-7.22 (m, 4H), 7.09-7.02 (m, 1H), 6.86-6.79 (m, 2H), 5.78-5.66 (m, 1H), 5.11-5.03 (m, 2H), 4.41 (s, 1H), 3.79 (s, 3H), 3.69 (d,  $J = 16.9$  Hz, 1H), 3.37 (d,  $J = 16.9$  Hz, 1H), 2.67-2.53 (m, 2H);  $^{13}\text{C}$  NMR (100 MHz,  $\text{CDCl}_3$ )  $\delta$  205.6, 158.4, 141.6, 137.6, 133.6, 133.4, 131.9, 128.7, 127.4, 126.3, 118.6, 118.5, 113.5, 75.6, 55.2, 51.8, 48.0; IR (cast film) 3498, 3073, 3004, 2933, 2835, 1687, 1610, 1586, 1512, 1250  $\text{cm}^{-1}$ ; APCI LRMS  $m/z$  357.07 ( $[\text{M}-\text{OH}]^+$ , 30), 177.21 ( $[\text{M}-\text{C}_8\text{H}_6\text{BrO}]^+$ , 100).

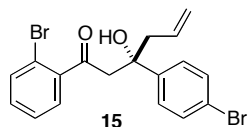

**Compound 15:** This reaction was performed according to general procedure 1 (0.17 mmol of 1-(1-bromophenyl)-3-(4-bromophenyl)-1,3-propanedione in  $\text{CHCl}_3$  at 23 °C for 16 h). Purification by flash

chromatography (1:5 EtOAc/hexanes) afforded **15** (55 mg, 77% yield) as an orange oil. The regioselectivity was determined by  $^1\text{H}$  NMR of the crude product mixture to be  $> 20:1$  (see HMBC spectrum below). The enantiomeric excess of **15** was determined to be 92% by chiral HPLC (see HPLC trace below).  $[\alpha]_{\text{D}} = +48.0^\circ$  (c 2.2,  $\text{CH}_2\text{Cl}_2$ );  $R_f = 0.33$  (1:5 EtOAc/hexanes);  $^1\text{H}$  NMR (400 MHz,  $\text{CDCl}_3$ )  $\delta$  7.60-7.55 (m, 1H), 7.45-7.39 (m, 2H), 7.33-7.24 (m, 4H), 7.12-7.06 (m, 1H), 5.69 (dddd,  $J = 17.1$  Hz, 10.4 Hz, 7.5 Hz, 6.9 Hz, 1H), 5.11-5.02 (m, 2H), 4.46 (s, 1H), 3.69 (d,  $J = 17.1$  Hz, 1H), 3.39 (d,  $J = 17.1$  Hz, 1H), 2.65-2.52 (m, 2H);  $^{13}\text{C}$  NMR (100 MHz,  $\text{CDCl}_3$ )  $\delta$  205.3, 144.6, 141.3, 133.7, 132.8, 132.1, 131.3, 128.7, 127.5, 127.0, 119.0, 118.6, 75.7, 51.5, 47.8; IR (cast film) 3495, 3074, 2978, 2908, 1687, 1587  $\text{cm}^{-1}$ ; APCI LRMS  $m/z$  407.01 ( $[\text{M}-\text{OH}]^+$ , 100).

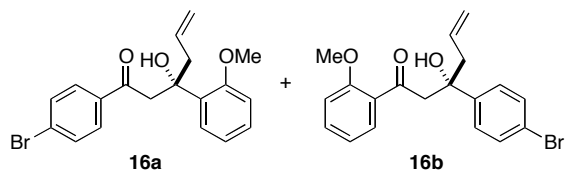

**Compound 16a:** This reaction was performed according to general procedure 1 (0.21 mmol of *p*-bromo *o*-methoxy dione in  $\text{CHCl}_3$  at  $23^\circ\text{C}$  for 15 h). Purification by flash chromatography (1:5 EtOAc/hexanes) afforded minor regioisomer **16b**

(15 mg, 19%) as pale yellow oil and a mixture of major regioisomer **16a** and trace amounts of unreacted starting material, which co-elute. This mixture was further purified again by flash chromatography (4:1  $\text{CH}_2\text{Cl}_2$ /hexanes) to afford **16a** (50 mg, 63%) as pale yellow oil. The regioselectivity was determined by  $^1\text{H}$  NMR analysis of the crude product mixture to be 4:1 (**16a:16b**, see HMBC spectrum below). The enantiomeric excess of **16a** was determined to be 95% by chiral HPLC (see HPLC traces below). Data for the major regioisomer **16a**:  $[\alpha]_{\text{D}} = +77.5^\circ$  (c 2.55,  $\text{CH}_2\text{Cl}_2$ );  $R_f = 0.44$  (1:5 EtOAc/hexanes);  $^1\text{H}$  NMR (400 MHz,  $\text{CDCl}_3$ ) 7.74-7.68 (m, 2H), 7.66 (dd,  $J = 7.8$  Hz, 1.7 Hz, 1H), 7.57-7.52 (m, 2H), 7.18 (ddd,  $J = 8.1$  Hz, 7.5 Hz, 1.8 Hz, 1H), 6.97 (ddd,  $J = 7.6$  Hz, 7.6 Hz, 1.1 Hz, 1H), 6.77 (dd,  $J = 8.2$  Hz, 0.9 Hz, 1H),  $\delta$  5.74 (dddd,  $J = 17.1$  Hz, 10.1 Hz, 7.9 Hz, 6.3 Hz, 1H), 5.09-4.99 (m, 2H), 4.76 (s, 1H), 4.23 (d,  $J = 16.4$  Hz, 1H), 3.76 (s, 3H), 3.19 (d,  $J = 16.4$  Hz, 1H), 2.86 (dd,  $J = 13.8$  Hz, 6.2 Hz, 1H), 2.70 (dd, 13.9 Hz, 8.0 Hz, 1H);  $^{13}\text{C}$  NMR (75 MHz,  $\text{CDCl}_3$ )  $\delta$  201.2, 155.1, 136.1, 134.1, 132.8, 131.8, 129.7, 128.5, 128.4, 128.0, 120.9, 117.7, 110.8, 75.2, 55.1, 45.7, 44.8; IR (cast film) 3473, 3073, 2909, 2836, 1670, 1584, 1235  $\text{cm}^{-1}$ ; APCI LRMS  $m/z$  356.46 ( $[\text{M}-\text{OH}]^+$ , 40), 176.9 ( $[\text{M}-\text{C}_8\text{H}_6\text{BrO}]^+$ , 100).

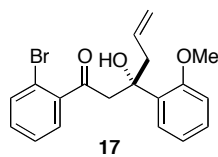

**Compound 17:** This reaction was performed according to general procedure 1 (0.24 mmol of 1-(1-bromophenyl)-3-(1-methoxyphenyl)-1,3-propanedione in  $\text{CHCl}_3$  at  $23^\circ\text{C}$  for 18 h). Purification by flash chromatography by first eluting with 2:1  $\text{CH}_2\text{Cl}_2$ /hexanes to remove trace amounts of unreacted starting material followed by 5% EtOAc/ $\text{CH}_2\text{Cl}_2$  to afford **17** (81 mg, 89% yield) as a yellow oil. The regioselectivity was determined by  $^1\text{H}$  NMR analysis of the crude product mixture to be  $>20:1$  (see HMBC spectrum below). The enantiomeric excess of **17** was determined to be 95% by chiral HPLC (see HPLC trace below).  $[\alpha]_{\text{D}} = +12.8^\circ$  (c 4.6,  $\text{CH}_2\text{Cl}_2$ );  $R_f = 0.38$  (1:5 EtOAc/hexanes);  $^1\text{H}$  NMR (400 MHz,  $\text{CDCl}_3$ )  $\delta$  7.62 (dd,  $J = 7.7$  Hz, 1.8 Hz, 1H), 7.54-7.50 (m, 1H), 7.23-7.14 (m, 3H), 6.97 (ddd,  $J = 7.6$  Hz, 7.6 Hz, 1.1 Hz, 1H), 6.83-6.78 (m, 1H), 6.66 (dd,  $J = 8.2$  Hz, 0.8 Hz, 1H), 5.75 (dddd,  $J = 17.0$  Hz, 10.2 Hz, 8.0 Hz, 6.3 Hz, 1H), 5.08-5.00 (m, 2H), 4.41 (s, 1H), 4.26 (d,  $J = 15.5$  Hz, 1H), 3.56 (s, 3H), 3.24 (dd,  $J = 15.5$  Hz, 1H), 2.82 (dd,  $J = 13.9$  Hz, 6.1 Hz, 1H), 2.70 (dd,  $J = 13.9$  Hz, 8.0 Hz, 1H);  $^{13}\text{C}$  NMR (100 MHz,  $\text{CDCl}_3$ )  $\delta$  206.5, 155.2, 141.9, 134.0, 133.2, 132.3, 131.5, 128.6, 128.5, 128.0, 127.1,

120.7, 118.6, 117.8, 110.6, 75.5, 54.7, 50.3, 44.5; IR (cast film) 3495, 3073, 2939, 2836, 1682, 1586, 1237  $\text{cm}^{-1}$ ; APCI LRMS  $m/z$  356.46 ( $[\text{M}-\text{OH}]^+$ , 35), 176.9 ( $[\text{M}-\text{C}_8\text{H}_6\text{BrO}]^+$ , 100).

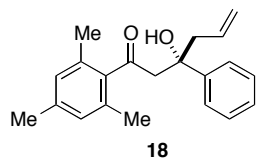

**Compound 18:** This reaction was performed according to general procedure 1 (0.23 mmol of mesitylbenzoylmethane in  $\text{CHCl}_3$  at 23 °C for 27 h). Purification by flash chromatography (5% EtOAc/hexanes) afforded **18** (68 mg, 94% yield) as a pale yellow oil. The regioselectivity was determined by  $^1\text{H}$  NMR analysis of the crude product mixture to be >20:1 (see HMBC spectrum below). The enantiomeric excess of **18** was determined to be 83% by chiral HPLC (see HPLC trace below).  $[\alpha]_D = +42.1^\circ$  (c 3.8,  $\text{CH}_2\text{Cl}_2$ );  $R_f = 0.31$  (10% EtOAc/hexanes);  $^1\text{H}$  NMR (400 MHz,  $\text{CDCl}_3$ )  $\delta$  7.47-7.41 (m, 2H), 7.36-7.29 (m, 2H), 7.26-7.20 (m, 1H), 6.78 (s, 2H), 5.73 (dddd,  $J = 16.0$  Hz, 10.9 Hz, 7.2 Hz, 7.2 Hz, 1H), 5.19-5.00 (m, 2H), 4.86 (s, 1H), 3.45 (d,  $J = 18.0$  Hz, 1H), 3.22 (d,  $J = 18.1$  Hz, 1H), 2.65-2.55 (m, 2H), 2.25 (s, 3H), 1.98 (s, 6H);  $^{13}\text{C}$  NMR (100 MHz,  $\text{CDCl}_3$ )  $\delta$  212.1, 145.7, 139.0, 138.6, 133.4, 133.0, 128.7, 128.1, 126.8, 125.1, 118.4, 75.5, 53.6, 47.9, 21.0, 19.0; IR (cast film) 3474, 3073, 3026, 2977, 2920, 1686, 1610  $\text{cm}^{-1}$ ; APCI LRMS  $m/z$  291.02 ( $[\text{M}-\text{OH}]^+$ , 5), 179.05 ( $[\text{M}-\text{C}_{11}\text{H}_{13}\text{O}+\text{MeOH}]^+$ , 50), 163.08 ( $[\text{M}-\text{C}_{10}\text{H}_8\text{O}]^+$ , 70), 147.05 ( $[\text{M}-\text{C}_{11}\text{H}_{13}\text{O}]^+$ , 100).

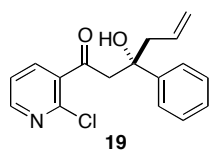

**Compound 19:** This reaction was performed according to general procedure 1 (0.39 mmol of 2-chloro-3-pyridoylbenzoylmethane in  $\text{CHCl}_3$  at 23 °C for 19 h). Purification by flash chromatography (1:5:5 EtOAc/hexanes/ $\text{CH}_2\text{Cl}_2$ ) afforded **19** (74 mg, 62% yield) as a pale yellow oil. The regioselectivity was determined by  $^1\text{H}$  NMR analysis of the crude product mixture to be 5:1 (see HMBC spectra below). The enantiomeric excess of **19** was determined to be 84% by chiral HPLC (see HPLC trace below).  $[\alpha]_D = 50.4^\circ$  (c 3.7,  $\text{CH}_2\text{Cl}_2$ );  $R_f = 0.40$  (1:5:5 EtOAc/hexanes/ $\text{CH}_2\text{Cl}_2$ );  $^1\text{H}$  NMR (400 MHz,  $\text{CDCl}_3$ )  $\delta$  8.43 (dd,  $J = 4.8$  Hz, 2.0 Hz, 1H), 7.38-7.33 (m, 3H), 7.31-7.26 (m, 2H), 7.23-7.17 (m, 2H), 5.78-5.65 (m, 1H), 5.13-5.07 (m, 2H), 4.09 (s, 1H), 3.83 (d,  $J = 16.4$  Hz, 1H), 3.40 (d,  $J = 16.4$  Hz, 1H), 2.70-2.55 (m, 2H);  $^{13}\text{C}$  NMR (100 MHz,  $\text{CDCl}_3$ )  $\delta$  203.2, 151.3, 147.0, 145.1, 137.9, 135.9, 132.9, 128.2, 127.0, 125.0, 122.4, 119.1, 75.9, 52.1, 47.9; IR (cast film) 3488, 3076, 2980, 1688, 1575, 1397  $\text{cm}^{-1}$ ; APCI LRMS  $m/z$  301.59 ( $[\text{M}+\text{H}]^+$ , 30), 283.62 ( $[\text{M}-\text{OH}]^+$ , 5), 155.80 ( $[\text{M}-\text{C}_{10}\text{H}_9\text{O}]^+$ , 100).

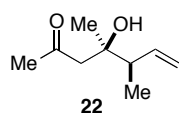

**Compound 22:** This reaction was performed according to general procedure 1 (0.48 mmol of acetylacetone in  $\text{CHCl}_3$  at 23 °C for 40 h). Purification by flash chromatography (25% Et<sub>2</sub>O/pentane) afforded **22** (52 mg, 69% yield) as a yellow oil. The diastereoselectivity was determined by GC analysis of the crude product mixture to be 99:1. The enantiomeric excess of **22** was determined to be 89% by chiral GC (see GC trace below).  $[\alpha]_D = +16.3^\circ$  (c 3.5,  $\text{CH}_2\text{Cl}_2$ );  $R_f = 0.43$  (25% Et<sub>2</sub>O/pentane);  $^1\text{H}$  NMR (400 MHz,  $\text{CDCl}_3$ )  $\delta$  5.73 (ddd,  $J = 16.4$  Hz, 10.9 Hz, 8.7 Hz, 1H), 5.05-4.97 (m, 2H), 3.88 (s, 1H), 2.69 (d,  $J = 17.3$  Hz, 1H), 2.50 (d,  $J = 17.3$  Hz, 1H), 2.37 (dq,  $J = 8.6$  Hz, 6.9 Hz, 1H), 2.15 (s, 3H), 1.03 (d,  $J = 6.9$  Hz, 3H);  $^{13}\text{C}$  NMR (100 MHz,  $\text{CDCl}_3$ )  $\delta$  211.5, 140.6, 115.7, 73.2, 50.9, 47.6, 31.9, 22.9, 14.2; IR (cast film) 3492, 3077, 2977, 2938, 1701, 1639  $\text{cm}^{-1}$ ; APCI LRMS  $m/z$  157.32 ( $[\text{M}+\text{H}]^+$ , 5), 139.29 ( $[\text{M}-\text{OH}]^+$ , 100).

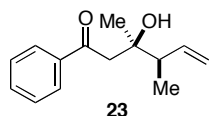

**Compound 23:** This reaction was performed according to general procedure 1 (0.17 mmol of benzoylacetone in  $\text{CHCl}_3$  at 23 °C for 40 h). Purification by

flash chromatography (1:5 EtOAc/hexanes) afforded **23** (27 mg, 75% yield) as a yellowish-orange oil. The regioselectivity and diastereoselectivity were both determined by  $^1\text{H}$  NMR analysis of the crude product mixture to be >20:1. The enantiomeric excess of **23** was determined to be 97% by chiral HPLC (see HPLC trace below).  $[\alpha]_{\text{D}} = -18.1^\circ$  (c 2.5,  $\text{CH}_2\text{Cl}_2$ );  $R_f = 0.38$  (1:5 EtOAc/hexanes);  $^1\text{H}$  NMR (300 MHz,  $\text{CDCl}_3$ )  $\delta$  7.97-7.88 (m, 2H), 7.62-7.54 (m, 1H), 7.51-7.42 (m, 2H), 5.80 (ddd,  $J = 17.0$  Hz, 10.4 Hz, 8.7 Hz, 1H), 5.04-4.92 (m, 2H), 4.25 (s, 1H), 3.23 (d,  $J = 17.2$  Hz, 1H), 3.03 (d,  $J = 17.2$  Hz, 1H), 2.51 (dq,  $J = 8.3$  Hz, 7.1 Hz, 1H), 1.23 (s, 3H), 1.11 (d,  $J = 6.9$  Hz, 3H);  $^{13}\text{C}$  NMR (75 MHz,  $\text{CDCl}_3$ )  $\delta$  202.4, 140.6, 137.5, 133.5, 128.7, 128.1, 115.9, 73.7, 47.7, 45.8, 23.2, 14.2; IR (cast film) 3494, 3069, 2976, 2937, 2885, 1670, 1597  $\text{cm}^{-1}$ ; APCI LRMS  $m/z$  218.97 ( $[\text{M}+\text{H}]^+$ , 75), 201.01 ( $[\text{M}-\text{OH}]^+$ , 100).

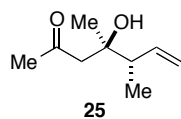

**Compound 25:** This reaction was performed according to general procedure 2 (0.088 mmol of acetylacetone in  $\text{CHCl}_3$  at 23 °C for 67 h). Purification by flash chromatography (25% EtOAc/hexanes) afforded **25** (13 mg, 91% yield) as a pale orange oil (Note: color impurities could be removed with activated charcoal treatment resulting in a pale yellow oil). The diastereoselectivity was determined by GC analysis of the crude product mixture to be 49:1. The enantiomeric excess of **25** was determined to be 91% by chiral GC. **Note:** The reaction time was reduced to 6 h when carried out at 50 °C to obtain **25** in 71% yield, 58:1 diastereoselectivity, and 84% enantiomeric excess (see GC trace below).  $[\alpha]_{\text{D}} = -19.4^\circ$  (c 3.3,  $\text{CH}_2\text{Cl}_2$ ; for 84% ee);  $R_f = 0.39$  (25% EtOAc/hexanes);  $^1\text{H}$  NMR (400 MHz,  $\text{CDCl}_3$ )  $\delta$  5.85 (ddd,  $J = 16.9$  Hz, 10.7 Hz, 8.2 Hz, 1H), 5.09-5.00 (m, 2H), 3.74 (s, 1H), 2.66 (d,  $J = 16.8$  Hz, 1H), 2.52 (d,  $J = 16.8$  Hz, 1H), 2.25 (dq,  $J = 7.1$  Hz, 7.7 Hz, 1H), 2.17 (s, 3H), 1.17 (s, 3H), 1.01 (d,  $J = 6.9$  Hz, 3H);  $^{13}\text{C}$  NMR (100 MHz,  $\text{CDCl}_3$ )  $\delta$  211.3, 140.0, 115.7, 73.2, 50.3, 47.7, 32.1, 24.6, 14.4; IR (cast film) 3486, 3077, 2976, 2937, 2885, 1701, 1639  $\text{cm}^{-1}$ ; APCI LRMS  $m/z$  157.24 ( $[\text{M}+\text{H}]^+$ , 10), 139.23 ( $[\text{M}-\text{OH}]^+$ , 100).

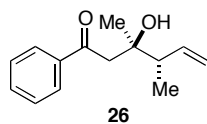

**Compound 26:** This reaction was performed according to general procedure 2 (0.065 mmol of benzoylacetone in  $\text{CHCl}_3$  at 23 °C for 64 h). Purification by flash chromatography (1:4 EtOAc/hexanes) afforded **26** (10 mg, 71% yield) as a red oil that was a mixture of regioisomers. The regioselectivity was determined by  $^1\text{H}$  NMR analysis of the crude product mixture to be 7:1 and the diastereoselectivity to be >20:1 for the major regioisomer. The enantiomeric excess of **26** was determined to be 96% by chiral HPLC. **Note:** The reaction time was reduced to 6 h when carried out at 50 °C to obtain **26** in 59% yield, 10:1 regioselectivity, >20:1 diastereoselectivity, and 94% enantiomeric excess (see HPLC trace below).  $[\alpha]_{\text{D}} = -31.5^\circ$  (c 2.8,  $\text{CH}_2\text{Cl}_2$ ; for 94% ee);  $R_f = 0.42$  (25% EtOAc/hexanes);  $^1\text{H}$  NMR (400 MHz,  $\text{CDCl}_3$ )  $\delta$  7.97-7.92 (m, 2H), 7.62-7.55 (m, 1H), 7.52-7.44 (m, 2H), 5.86 (ddd,  $J = 17.8$  Hz, 9.7 Hz, 8.0 Hz, 1H), 5.12-5.05 (m, 2H), 4.16 (s, 1H), 3.16 (d,  $J = 16.9$  Hz, 1H), 3.10 (d,  $J = 16.8$  Hz, 1H), 2.40 (dq,  $J = 7.8$  Hz, 7.0 Hz, 1H), 1.27 (s, 3H), 1.08 (d,  $J = 6.9$  Hz, 3H);  $^{13}\text{C}$  NMR (100 MHz,  $\text{CDCl}_3$ )  $\delta$  202.3, 140.1, 137.5, 133.5, 128.7, 128.1, 115.7, 73.6, 47.8, 44.9, 24.9, 14.5; IR (cast film) 3487, 3069, 2975, 2936, 1670, 1597, 1216  $\text{cm}^{-1}$ ; LRMS (APCI)  $m/z$  219.26 ( $[\text{M}+\text{H}]^+$ , 100), 201.25 ( $[\text{M}-\text{OH}]^+$ , 85).

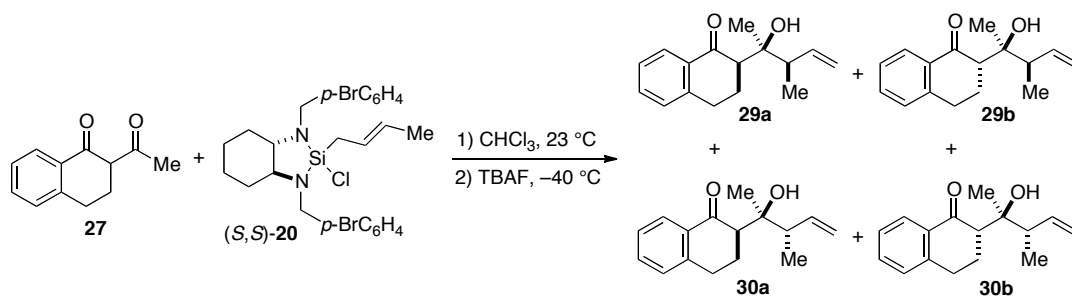

**Compound 29a:** This reaction was performed according to general procedure 1 (0.45 mmol of 2-acetyl-1-tetralone **27** in  $\text{CHCl}_3$  at 23 °C for 43 h). Purification by flash chromatography (1:5 EtOAc/hexanes) afforded **29a** (76 mg, 69% yield) as an orange oil. The regioselectivity and the diastereoselectivity were determined by  $^1\text{H}$  NMR analysis of the crude product mixture to be >20:1 and 94:4:2:0 (**29a:29b:30a:30b**), respectively. The enantiomeric excess of **29a** was determined to be 98% by chiral HPLC (see HPLC trace below).  $[\alpha]_{\text{D}} = -48.1^\circ$  (c 2.4,  $\text{CH}_2\text{Cl}_2$ );  $R_f = 0.28$  (1:5 EtOAc/hexanes);  $^1\text{H}$  NMR (300 MHz,  $\text{CDCl}_3$ )  $\delta$  7.99 (d,  $J = 7.8$  Hz, 1H), 7.52-7.44 (m, 1H), 7.35-7.27 (m, 1H), 7.23 (d,  $J = 7.6$  Hz, 1H), 5.86 (ddd,  $J = 17.8$  Hz, 9.2 Hz, 9.0 Hz, 1H), 5.03-4.93 (m, 2H), 4.57 (s, 1H), 3.07-2.87 (m, 2H), 2.76-2.60 (m, 2H), 2.35-2.25 (m, 1H), 2.06 (dddd,  $J = 13.3$  Hz, 13.3 Hz, 10.8 Hz, 6.1 Hz, 1H), 1.28 (s, 3H), 1.00 (d,  $J = 6.9$  Hz, 3H);  $^{13}\text{C}$  NMR (75 MHz,  $\text{CDCl}_3$ )  $\delta$  202.4, 144.0, 140.9, 133.6, 133.3, 128.5, 127.3, 126.7, 115.3, 76.1, 56.4, 45.2, 29.8, 25.3, 24.1, 16.1; IR (cast film) 3420, 3071, 2976, 2936, 2878, 1661, 1600  $\text{cm}^{-1}$ ; APCI LRMS  $m/z$  245.29 ( $[\text{M}+\text{H}]^+$ , 70), 227.30 ( $[\text{M}-\text{OH}]^+$ , 40), 147.17 ( $[\text{M}-\text{C}_6\text{H}_9\text{O}]^+$ , 100).

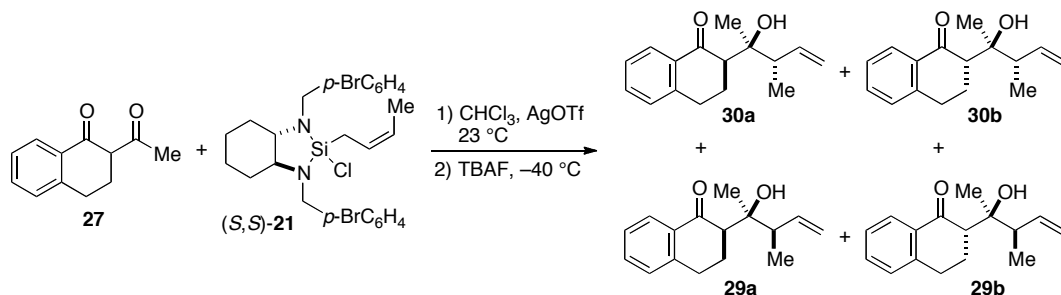

**Compound 30a:** This reaction was performed according to general procedure 2 (0.31 mmol of 2-acetyl-1-tetralone **27** in  $\text{CHCl}_3$  at rt for 48 h). Purification by flash chromatography (1:4 EtOAc/hexanes) afforded **30a** (45 mg, 59% yield) as a red oil. The regioselectivity and the diastereoselectivity were determined by  $^1\text{H}$  NMR analysis of the crude product mixture to be >20:1 and 88:10:2:0 (**30a:30b:29a:29b**), respectively. The enantiomeric excess of **30a** was determined to be 96% by chiral HPLC (see HPLC trace below).  $[\alpha]_{\text{D}} = -43.0^\circ$  (c 2.1,  $\text{CH}_2\text{Cl}_2$ );  $R_f = 0.31$  (1:4 EtOAc/hexanes);  $^1\text{H}$  NMR (300 MHz,  $\text{CDCl}_3$ )  $\delta$  7.95 (d,  $J = 7.7$  Hz, 1H), 7.50-7.41 (m, 1H), 7.34-7.25 (m, 1H), 7.21 (d,  $J = 7.6$  Hz, 1H), 5.84 (ddd,  $J = 17.3$  Hz, 10.2 Hz, 9.1 Hz, 1H), 4.92-4.79 (m, 2H), 4.54 (s, 1H), 3.09-2.85 (m, 2H), 2.70-2.56 (m, 2H), 2.33-2.21 (m, 1H), 2.07 (dddd,  $J = 13.0$  Hz, 13.0 Hz, 11.7 Hz, 5.0 Hz, 1H), 1.31 (s, 3H), 1.07 (d,  $J = 6.8$  Hz, 3H);  $^{13}\text{C}$  NMR (75 MHz,  $\text{CDCl}_3$ )  $\delta$  202.1, 143.7, 141.4, 133.7, 133.3, 128.3, 127.4, 126.6, 115.0, 76.7, 56.1, 45.2, 29.6, 24.8, 24.6, 14.8; IR (cast film) 3415, 3071, 2975, 2936, 2878, 1679, 1658, 1600, 1223  $\text{cm}^{-1}$ ; APCI LRMS  $m/z$  245.33 ( $[\text{M}+\text{H}]^+$ , 50), 227.33 ( $[\text{M}-\text{OH}]^+$ , 30), 147.18 ( $[\text{M}-\text{C}_6\text{H}_9\text{O}]^+$ , 100).



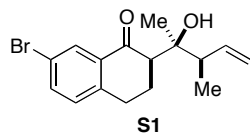

**Compound S1:** This reaction was performed according to general procedure 1 (0.18 mmol of bromotetralone in  $\text{CHCl}_3$  at rt for 38 h). Purification by flash chromatography (1:4 EtOAc/hexanes) afforded **S1** (29 mg, 49% yield) as an orange-red oil. The regioselectivity was determined by  $^1\text{H}$  NMR analysis of the crude product mixture to be >20:1 and the diastereoselectivity to be 85:10:5:0. The enantiomeric excess of **S1** was determined to be 94% by chiral HPLC (see HPLC trace below).  $[\alpha]_{\text{D}} = +20.7^\circ$  (c 1.76, EtOH);  $R_f = 0.31$  (25% EtOAc/hexanes);  $^1\text{H}$  NMR (300 MHz,  $\text{CDCl}_3$ )  $\delta$  8.10 (d,  $J = 2.2$  Hz, 1H), 7.58 (dd,  $J = 8.2$  Hz, 2.2 Hz, 1H), 7.12 (d, 8.2 Hz, 1H), 5.86 (ddd,  $J = 17.7$  Hz, 9.6 Hz, 9.0 Hz, 1H), 5.04-4.96 (m, 2H), 4.06 (s, 1H), 3.04-2.80 (m, 2H), 2.77-2.63 (m, 2H), 2.38-2.26 (m, 1H), 2.06 (dddd,  $J = 13.3$  Hz, 13.3 Hz, 12.0 Hz, 4.8 Hz, 1H), 1.28 (s, 3H), 1.00 (d,  $J = 6.9$  Hz, 3H);  $^{13}\text{C}$  NMR (100 MHz,  $\text{CDCl}_3$ )  $\delta$  200.8, 142.6, 140.7, 136.3, 134.9, 130.3, 130.2, 120.7, 115.6, 75.9, 56.1, 45.1, 29.3, 25.0, 23.7, 15.9; IR (cast film) 3441, 3071, 2974, 2934, 2877, 1678, 1589, 1214  $\text{cm}^{-1}$ ; APCI LRMS  $m/z$  322.93 ( $[\text{M}+\text{H}]^+$ , 25), 304.92 ( $[\text{M}-\text{OH}]^+$ , 100).

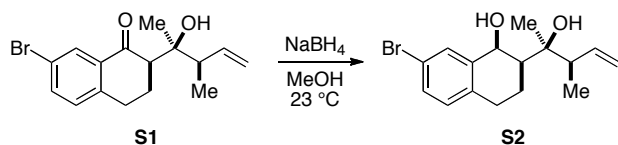

**Compound S2:** To a solution of **S1** (14 mg, 0.043 mmol) in MeOH (3 mL) was added  $\text{NaBH}_4$  (4 mg, 0.11 mmol). The mixture was stirred at 23  $^\circ\text{C}$  until the reaction was complete by TLC (2:1  $\text{CH}_2\text{Cl}_2$ /hexanes,  $\text{KMnO}_4$ ); 3 h. The reaction was quenched with  $\text{H}_2\text{O}$  (3 mL), extracted with 2  $\times$  10 mL  $\text{Et}_2\text{O}$  and the organic phases combined. The organic phase was washed with  $\text{H}_2\text{O}$  (5 mL), brine (5 mL) and dried over  $\text{MgSO}_4$ . The mixture was filtered and concentrated in vacuo to yield **S2** (14 mg, quantitative) as a pale yellow oil. The diastereoselectivity was determined by  $^1\text{H}$  NMR to be 5:1.  $R_f = 0.31$  (25% EtOAc/hexanes);  $^1\text{H}$  NMR (400 MHz,  $\text{CDCl}_3$ )  $\delta$  7.44 (d,  $J = 2.1$  Hz, 1H), 7.34 (dd,  $J = 8.1$  Hz, 2.1 Hz, 1H), 7.01 (d,  $J = 8.2$  Hz, 1H), 5.63 (ddd,  $J = 17.1$  Hz, 10.3 Hz, 9.3 Hz, 1H), 5.10-4.95 (m, 3H), 3.02 (bs, 1H), 2.91 (ddd,  $J = 17.1$  Hz, 5.1 Hz, 2.4 Hz, 1H), 2.78-2.57 (m, 3H), 2.05-1.88 (m, 2H), 1.76 (ddd,  $J = 11.8$  Hz, 3.0 Hz, 3.0 Hz, 1H), 1.35 (s, 3H), 1.10 (d,  $J = 6.7$  Hz, 3H);  $^{13}\text{C}$  NMR (100 MHz,  $\text{CDCl}_3$ )  $\delta$  140.5, 140.3, 136.1, 132.5, 131.3, 130.7, 119.4, 115.6, 75.9, 69.6, 44.9, 43.9, 29.0, 20.1, 16.3, 14.2; IR (cast film) 3358, 3074, 2976, 2933  $\text{cm}^{-1}$ ; LRMS (APCI) 307.05 ( $[\text{M}-\text{OH}]^+$ , 20), 251.1 ( $[\text{M}-\text{OH}-\text{C}_4\text{H}_7]^+$ , 100).

## Mechanism Discussion

We conducted an experiment where only a *trans*-silyl enol ether could form (**S3**) to provide evidence that allylation does not occur via this isomer due to the silicon atom's inability to reach the  $\beta$ -carbonyl and provide the intramolecular Lewis acid activation needed for allylation to occur (Supplementary Figure 1). The reaction of  $\beta$ -diketone **5** with allylsilane (*S,S*)-**3** lead to the clean formation of **S3**, as determined by  $^1\text{H}$  NMR spectroscopy, but did not undergo allylation to provide product **S4**.

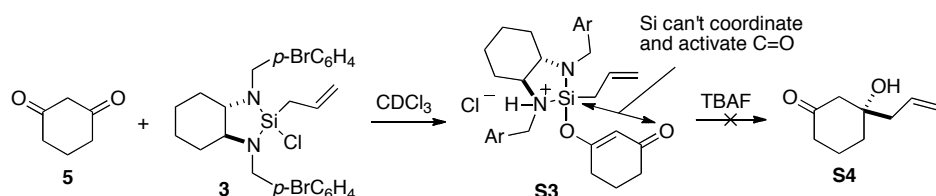

Supplementary Figure 1 | Attempted allylation of  $\beta$ -diketone **5**.

To provide evidence that the enol tautomer is required for the allylation of  $\beta$ -diketones compound **6** was mixed with allylsilane (*S,S*)-**3**, which resulted in no reaction even after heating to 60  $^\circ\text{C}$  for 3 days (Supplementary Figure 2).

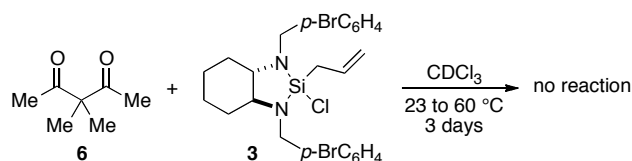

Supplementary Figure 2 | Control experiment to show that  $\beta$ -diketones that have a very low (or zero) concentration of enol tautomer do not undergo allylation with (*S,S*)-**3**.

The formation of *cis* and *trans* isomers of the silyl enol ethers was determined by  $^1\text{H}$  NMR spectroscopy by mixing acetylacetone with *cis*-crotylsilane reagent (*S,S*)-**21** in the presence of silver triflate following the general procedure and observing the formation of two sets of intermediate silyl enol ether peaks that we have assigned to *cis*- and *trans*-silyl enol ethers **S5** and **S6**, respectively, in a ratio of *ca.* 1:1 (Supplementary Figure 3). It is interesting to note that the formation of **S5** and **S6** is rapid for the enol tautomer of acetylacetone with a much slower disappearance of the dione tautomer. The emergence of product **S7** can be seen by the formation of a new singlet upfield at 4.41 ppm representing the vinyl proton signal of **S7** (Supplementary Figure 3a) and new methyl signals at 1.77 and 1.22 ppm (Supplementary Figure 3b). The signals for intermediates **S5** and **S6** disappear at approximately the same rate suggesting that the two isomers are in rapid equilibrium where only intermediate **S5** can lead to product **S7**, as previously discussed in Supplementary Figure 1. Further evidence that supports this premise is that the isolated yield for this reaction was 69%, which is higher than would be expected from a 1:1 mixture of **S5** and **S6** if isomerization was not occurring.

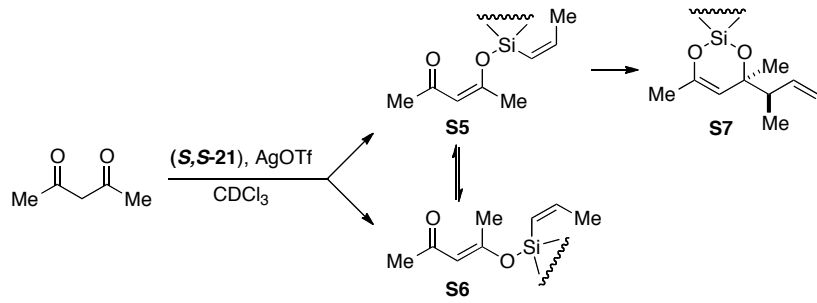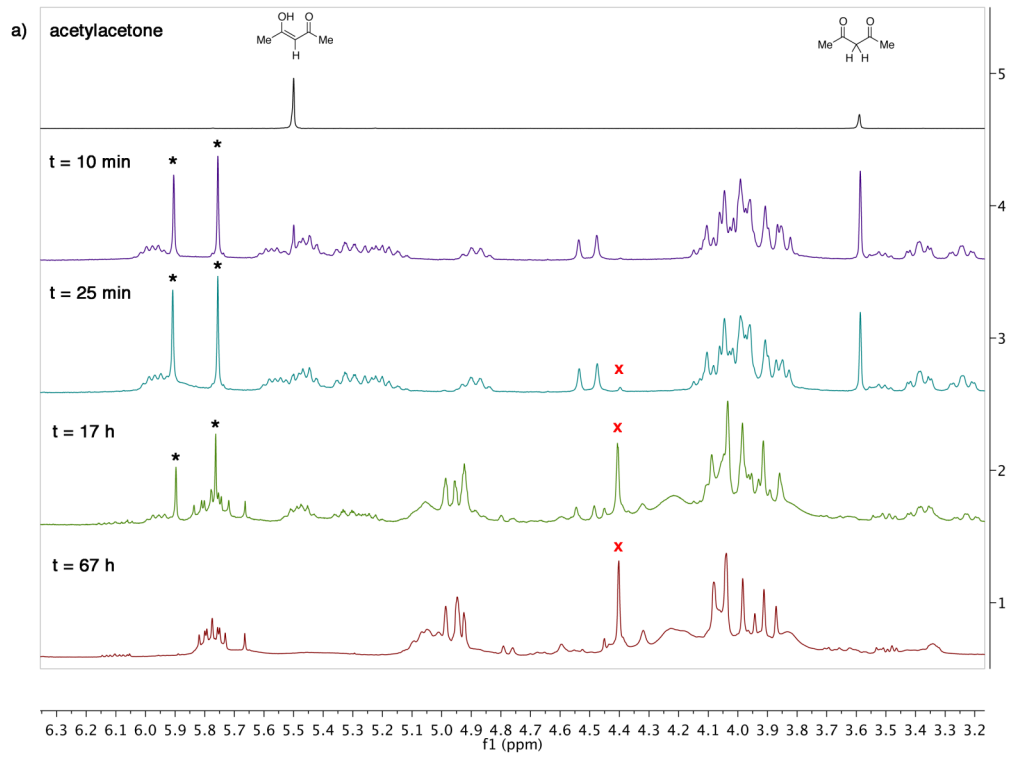

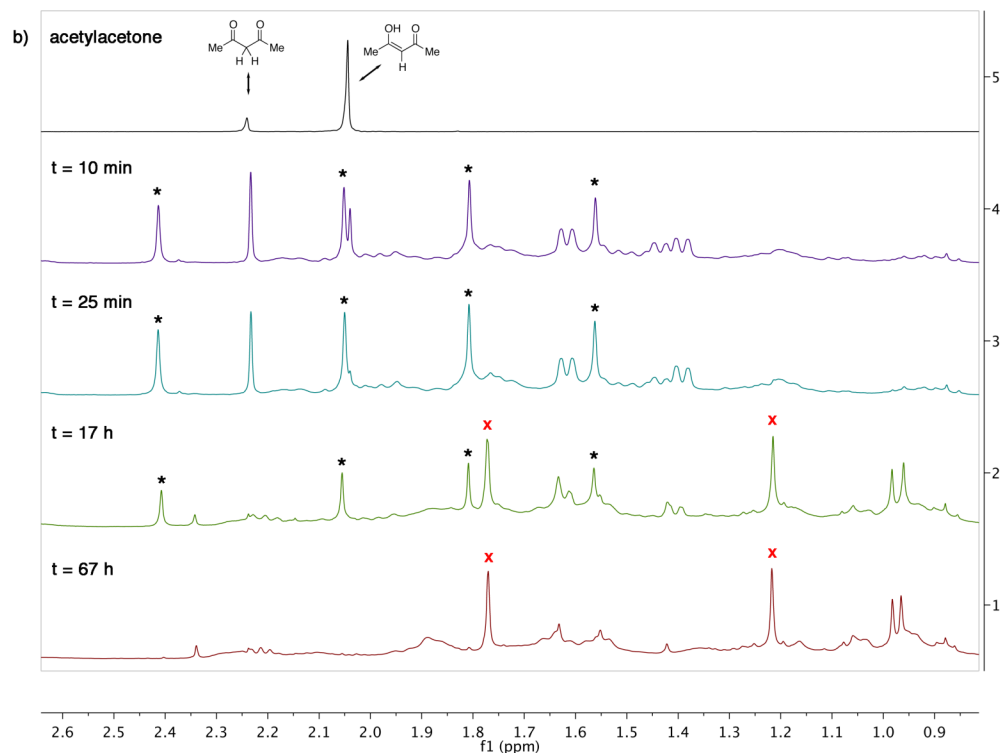

**Supplementary Figure 3** | Time dependant  $^1\text{H}$  NMR analysis of the **a**) vinyl region and the **b**) methyl region of the spectrum for the crotylation of acetylacetone. The spectra show the rapid formation of intermediates **S5** and **S6** (black asterisk, *cis/trans* ratio ca. 1:1) and the slow growth of product **S7** (red X), taking ca. 67 h for the crotylation reaction to complete.

The crotylation of 2-acetyl-1-tetralone **27** with (*S,S*)-**21** was carried out following the general procedure and the reaction progress was followed by  $^1\text{H}$  NMR spectroscopy which provides evidence that silyl tautomerization is occurring in the reaction mechanism. Silyl enol ether isomers **S8-S10** are formed in an unassigned ratio of 2:3:4:1 once all starting material was consumed, as determined by  $^1\text{H}$  NMR spectroscopy, based on the formation of 3 new singlets in at 2.53, 2.11 and 1.97 ppm (Supplementary Figure 4). It is clear that a substantial portion of silyl enol ether is present as either **S9** or **S10** (unassigned) based on the presence and proportions of these 3 peaks and since the regioselectivity of isolated product **30** is >20:1, the results suggest that tautomerization is occurring and is fast and reversible compared to the crotylation step leading preferentially to product **S11** via intermediate **S8**.

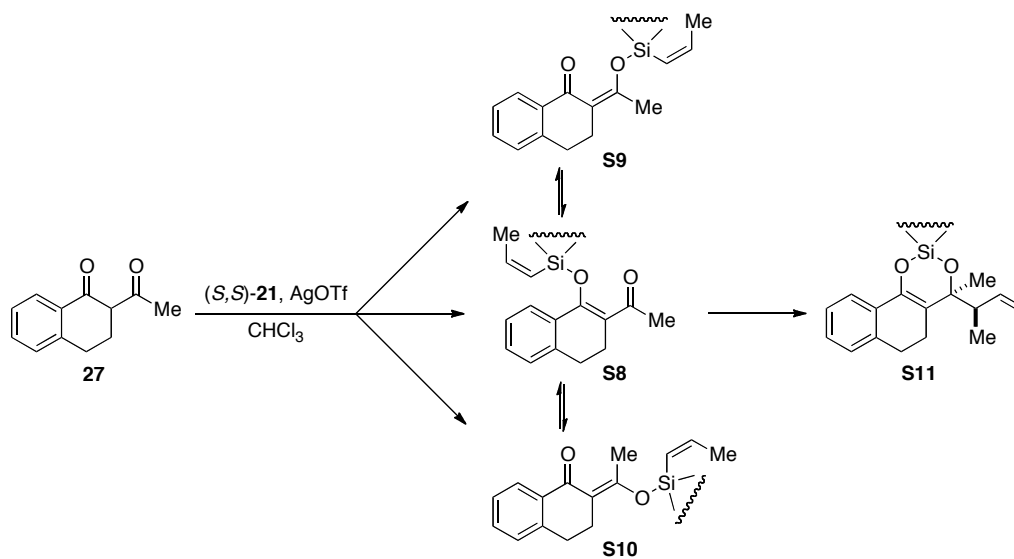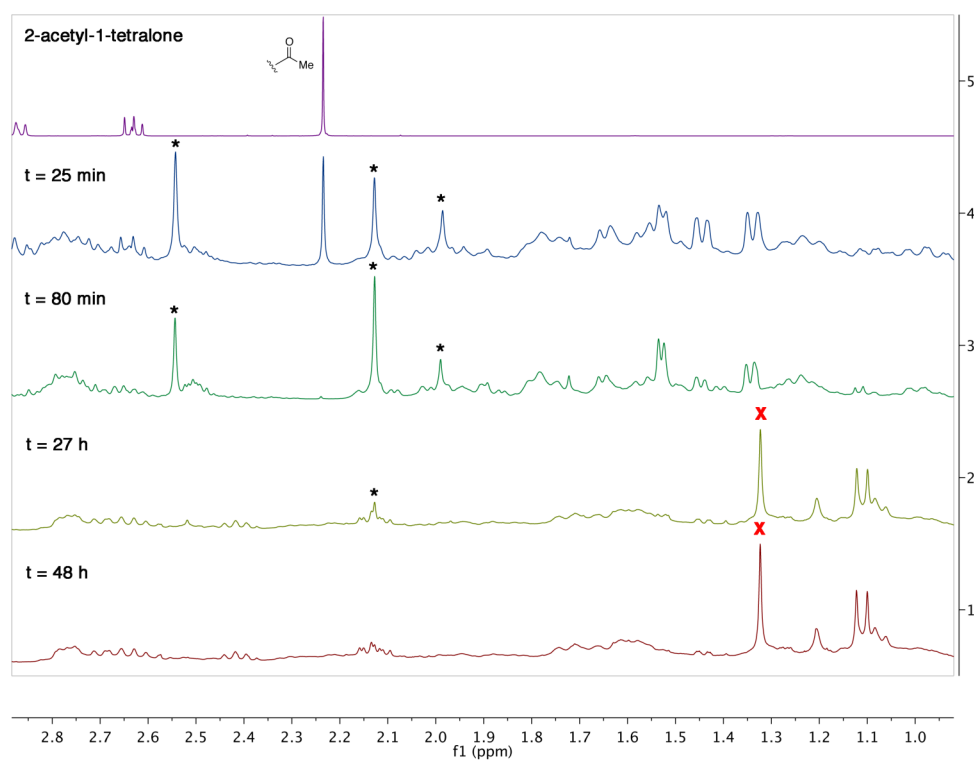

**Supplementary Figure 4** | Time dependant  $^1\text{H}$  NMR analysis of the methyl region of the spectrum for the crotylation of **27** showing the rapid formation of intermediates **S8**, **S9**, and **S10** (black asterisk, *ca.* 2:3.4:1 ratio at 80 min) and the slow growth of product **S11** (red X), taking *ca.* 48 h for the crotylation to complete.

## Determination of relative and absolute stereochemistry

Single crystals suitable for X-ray crystallographic analysis were grown by slow evaporation of a solution of **S2** in hexanes (Supplementary Figure 5). This structure allowed the assignment of absolute configuration as shown. The absolute configuration of all other products was assigned by analogy. We thank Prof. Ged Parkin and Mr. Wesley Sattler for the x-ray structure analysis, and the National Science Foundation (CHE-0619638) is thanked for acquisition of an X-ray diffractometer. CCDC 874744 contains the supplementary crystallographic data for this paper. These data can be obtained free of charge from The Cambridge Crystallographic Data Centre via [www.ccdc.cam.ac.uk/data\\_request/cif](http://www.ccdc.cam.ac.uk/data_request/cif).

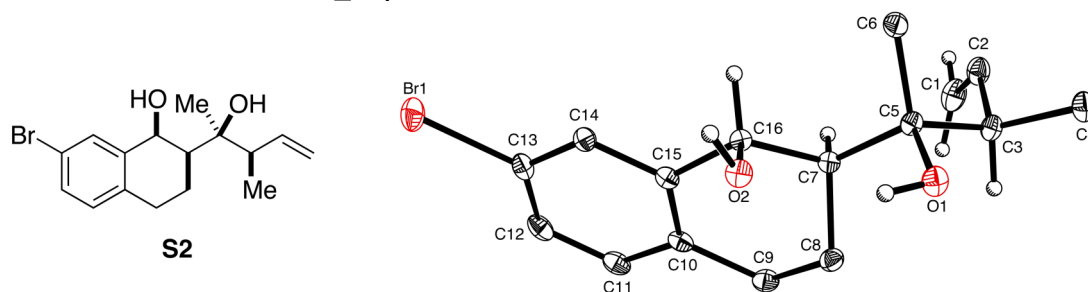

**Supplementary Figure 5** | X-ray crystal structure of **S2**.

**Supplementary Table 1** | Crystal data and structure refinement for **S2**.

|                                                         |                       |
|---------------------------------------------------------|-----------------------|
| <code>_audit_creation_method</code>                     | SHELXL-97             |
| <code>_chemical_formula_sum</code>                      | 'C16 H21 Br O2'       |
| <code>_chemical_formula_weight</code>                   | 325.24                |
| <code>_chemical_absolute_configuration</code>           | AD                    |
| <code>_atom_type_scatter_source</code>                  | 'C' 'C' 0.0033 0.0016 |
| 'International Tables Vol C Tables 4.2.6.8 and 6.1.1.4' |                       |
| <code>'H' 'H'</code>                                    | 0.0000 0.0000         |
| 'International Tables Vol C Tables 4.2.6.8 and 6.1.1.4' |                       |
| <code>'O' 'O'</code>                                    | 0.0106 0.0060         |
| 'International Tables Vol C Tables 4.2.6.8 and 6.1.1.4' |                       |
| <code>'Br' 'Br'</code>                                  | -0.2901 2.4595        |
| 'International Tables Vol C Tables 4.2.6.8 and 6.1.1.4' |                       |
| <code>_symmetry_cell_setting</code>                     | Orthorhombic          |
| <code>_symmetry_space_group_name_H-M</code>             | P2(1)2(1)2(1)         |
| <code>_symmetry_equiv_pos_as_xyz</code>                 |                       |
| <code>'x, y, z'</code>                                  |                       |
| <code>'-x+1/2, -y, z+1/2'</code>                        |                       |
| <code>'-x, y+1/2, -z+1/2'</code>                        |                       |
| <code>'x+1/2, -y+1/2, -z'</code>                        |                       |

|                                 |                              |
|---------------------------------|------------------------------|
| _cell_length_a                  | 8.5529(6)                    |
| _cell_length_b                  | 8.8479(7)                    |
| _cell_length_c                  | 19.3771(14)                  |
| _cell_angle_alpha               | 90.00                        |
| _cell_angle_beta                | 90.00                        |
| _cell_angle_gamma               | 90.00                        |
| _cell_volume                    | 1466.37(19)                  |
| _cell_formula_units_Z           | 4                            |
| _cell_measurement_temperature   | 150(2)                       |
| _cell_measurement_reflns_used   | 9914                         |
| _cell_measurement_theta_min     | 2.53                         |
| _cell_measurement_theta_max     | 31.55                        |
|                                 |                              |
| _exptl_crystal_description      | BLOCK                        |
| _exptl_crystal_colour           | COLORLESS                    |
| _exptl_crystal_size_max         | 0.69                         |
| _exptl_crystal_size_mid         | 0.54                         |
| _exptl_crystal_size_min         | 0.15                         |
| _exptl_crystal_density_meas     | ?                            |
| _exptl_crystal_density_diffn    | 1.473                        |
| _exptl_crystal_density_method   | 'not measured'               |
| _exptl_crystal_F_000            | 672                          |
| _exptl_absorpt_coefficient_mu   | 2.799                        |
| _exptl_absorpt_correction_type  | EMPIRICAL                    |
| _exptl_absorpt_correction_T_min | 0.2483                       |
| _exptl_absorpt_correction_T_max | 0.6788                       |
| _exptl_absorpt_process_details  | SADABS                       |
|                                 |                              |
| _diffn_ambient_temperature      | 150(2)                       |
| _diffn_radiation_wavelength     | 0.71073                      |
| _diffn_radiation_type           | MoK $\alpha$                 |
| _diffn_radiation_source         | 'fine-focus sealed tube'     |
| _diffn_radiation_monochromator  | graphite                     |
| _diffn_measurement_device_type  | 'Bruker APEX-II CCD'         |
| _diffn_measurement_method       | ' $\omega$ and $\phi$ scans' |
| _diffn_detector_area_resol_mean | ?                            |
| _diffn_reflns_number            | 25387                        |
| _diffn_reflns_av_R_equivalents  | 0.0402                       |
| _diffn_reflns_av_sigmaI/netI    | 0.0358                       |
| _diffn_reflns_limit_h_min       | -12                          |
| _diffn_reflns_limit_h_max       | 12                           |
| _diffn_reflns_limit_k_min       | -13                          |
| _diffn_reflns_limit_k_max       | 13                           |

|                                 |                               |
|---------------------------------|-------------------------------|
| _diffn_reflms_limit_l_min       | -29                           |
| _diffn_reflms_limit_l_max       | 29                            |
| _diffn_reflms_theta_min         | 2.10                          |
| _diffn_reflms_theta_max         | 32.68                         |
| _reflms_number_total            | 5169                          |
| _reflms_number_gt               | 4014                          |
| _reflms_threshold_expression    | >2sigma(I)                    |
|                                 |                               |
| _computing_data_collection      | 'Bruker APEX2'                |
| _computing_cell_refinement      | 'Bruker SAINT'                |
| _computing_data_reduction       | 'Bruker SAINT'                |
| _computing_structure_solution   | 'SHELXS-97 (Sheldrick, 2008)' |
| _computing_structure_refinement | 'SHELXL-97 (Sheldrick, 2008)' |
| _computing_molecular_graphics   | 'Bruker SHELXTL'              |
| _computing_publication_material | 'Bruker SHELXTL'              |

#### \_refine\_special\_details

Refinement of  $F^2$  against ALL reflections. The weighted R-factor  $wR$  and goodness of fit  $S$  are based on  $F^2$ , conventional R-factors  $R$  are based on  $F$ , with  $F$  set to zero for negative  $F^2$ . The threshold expression of  $F^2 > 2\sigma(F^2)$  is used only for calculating R-factors(gt) etc. and is not relevant to the choice of reflections for refinement. R-factors based on  $F^2$  are statistically about twice as large as those based on  $F$ , and R-factors based on ALL data will be even larger.

|                                  |                                                                   |
|----------------------------------|-------------------------------------------------------------------|
| _refine_ls_structure_factor_coef | Fsqd                                                              |
| _refine_ls_matrix_type           | full                                                              |
| _refine_ls_weighting_scheme      | calc                                                              |
| _refine_ls_weighting_details     | 'calc w=1/[s^2(Fo^2)+(0.0525P)^2+0.2811P] where P=(Fo^2+2Fc^2)/3' |
| _atom_sites_solution_primary     | direct                                                            |
| _atom_sites_solution_secondary   | difmap                                                            |
| _atom_sites_solution_hydrogens   | geom                                                              |
| _refine_ls_hydrogen_treatment    | CONSTR                                                            |
| _refine_ls_extinction_method     | none                                                              |
| _refine_ls_extinction_coef       | ?                                                                 |
| _refine_ls_abs_structure_details | 'Flack H D (1983), Acta Cryst. A39, 876-881'                      |
| _refine_ls_abs_structure_Flack   | -0.025(10)                                                        |
| _refine_ls_number_reflms         | 5169                                                              |
| _refine_ls_number_parameters     | 177                                                               |
| _refine_ls_number_restraints     | 0                                                                 |
| _refine_ls_R_factor_all          | 0.0624                                                            |
| _refine_ls_R_factor_gt           | 0.0401                                                            |



|                                |        |
|--------------------------------|--------|
| _refine_ls_wR_factor_ref       | 0.1012 |
| _refine_ls_wR_factor_gt        | 0.0919 |
| _refine_ls_goodness_of_fit_ref | 1.053  |
| _refine_ls_restrained_S_all    | 1.053  |
| _refine_ls_shift/su_max        | 0.001  |
| _refine_ls_shift/su_mean       | 0.000  |

\_atom\_site\_label  
 \_atom\_site\_type\_symbol  
 \_atom\_site\_fract\_x  
 \_atom\_site\_fract\_y  
 \_atom\_site\_fract\_z  
 \_atom\_site\_U\_iso\_or\_equiv  
 \_atom\_site\_adp\_type  
 \_atom\_site\_occupancy  
 \_atom\_site\_symmetry\_multiplicity  
 \_atom\_site\_calc\_flag  
 \_atom\_site\_refinement\_flags  
 \_atom\_site\_disorder\_assembly  
 \_atom\_site\_disorder\_group

|        |              |              |              |            |                     |
|--------|--------------|--------------|--------------|------------|---------------------|
| Br1 Br | -0.08420(3)  | -0.74198(3)  | 0.000713(13) | 0.03718(8) | Uani 1 1 d . . .    |
| O1 O   | -0.11593(18) | 0.00015(18)  | 0.26803(9)   | 0.0256(3)  | Uani 1 1 d . . .    |
| H1A H  | -0.0430      | -0.0377      | 0.2447       | 0.031      | Uiso 1 1 calc R . . |
| O2 O   | -0.00327(17) | -0.22570(18) | 0.18106(8)   | 0.0228(3)  | Uani 1 1 d . . .    |
| H2A H  | 0.0571       | -0.2926      | 0.1964       | 0.027      | Uiso 1 1 calc R . . |
| C1 C   | -0.6489(3)   | -0.1255(3)   | 0.26613(16)  | 0.0361(6)  | Uani 1 1 d . . .    |
| H1B H  | -0.6514      | -0.0700      | 0.2242       | 0.043      | Uiso 1 1 calc R . . |
| H1C H  | -0.7331      | -0.1908      | 0.2777       | 0.043      | Uiso 1 1 calc R . . |
| C2 C   | -0.5293(3)   | -0.1119(3)   | 0.30807(13)  | 0.0286(5)  | Uani 1 1 d . . .    |
| H2B H  | -0.5321      | -0.1696      | 0.3494       | 0.034      | Uiso 1 1 calc R . . |
| C3 C   | -0.3881(3)   | -0.0135(2)   | 0.29688(12)  | 0.0230(4)  | Uani 1 1 d . . .    |
| H3A H  | -0.4155      | 0.0618       | 0.2604       | 0.028      | Uiso 1 1 calc R . . |
| C4 C   | -0.3537(3)   | 0.0745(3)    | 0.36312(13)  | 0.0281(5)  | Uani 1 1 d . . .    |
| H4A H  | -0.4463      | 0.1328       | 0.3764       | 0.042      | Uiso 1 1 calc R . . |
| H4B H  | -0.2658      | 0.1434       | 0.3552       | 0.042      | Uiso 1 1 calc R . . |
| H4C H  | -0.3269      | 0.0036       | 0.4001       | 0.042      | Uiso 1 1 calc R . . |
| C5 C   | -0.2458(2)   | -0.1047(2)   | 0.27069(11)  | 0.0192(4)  | Uani 1 1 d . . .    |
| C6 C   | -0.2048(3)   | -0.2322(3)   | 0.32101(11)  | 0.0250(4)  | Uani 1 1 d . . .    |
| H6A H  | -0.1024      | -0.2743      | 0.3090       | 0.038      | Uiso 1 1 calc R . . |
| H6B H  | -0.2843      | -0.3118      | 0.3180       | 0.038      | Uiso 1 1 calc R . . |
| H6C H  | -0.2017      | -0.1922      | 0.3681       | 0.038      | Uiso 1 1 calc R . . |
| C7 C   | -0.2754(2)   | -0.1655(2)   | 0.19689(10)  | 0.0184(4)  | Uani 1 1 d . . .    |
| H7A H  | -0.3808      | -0.2144      | 0.1975       | 0.022      | Uiso 1 1 calc R . . |

|        |            |            |              |           |                     |
|--------|------------|------------|--------------|-----------|---------------------|
| C8 C   | -0.2800(3) | -0.0450(2) | 0.14016(12)  | 0.0240(4) | Uani 1 1 d . . .    |
| H8A H  | -0.3449    | 0.0414     | 0.1556       | 0.029     | Uiso 1 1 calc R . . |
| H8B H  | -0.1729    | -0.0073    | 0.1313       | 0.029     | Uiso 1 1 calc R . . |
| C9 C   | -0.3477(3) | -0.1106(3) | 0.07426(12)  | 0.0262(5) | Uani 1 1 d . . .    |
| H9A H  | -0.4625    | -0.1193    | 0.0794       | 0.031     | Uiso 1 1 calc R . . |
| H9B H  | -0.3268    | -0.0399    | 0.0357       | 0.031     | Uiso 1 1 calc R . . |
| C10 C  | -0.2815(2) | -0.2644(3) | 0.05597(10)  | 0.0222(4) | Uani 1 1 d . . .    |
| C11 C  | -0.3161(3) | -0.3309(3) | -0.00746(12) | 0.0276(5) | Uani 1 1 d . . .    |
| H11A H | -0.3789    | -0.2774    | -0.0396      | 0.033     | Uiso 1 1 calc R . . |
| C12 C  | -0.2612(3) | -0.4724(3) | -0.02460(12) | 0.0292(5) | Uani 1 1 d . . .    |
| H12A H | -0.2869    | -0.5169    | -0.0678      | 0.035     | Uiso 1 1 calc R . . |
| C13 C  | -0.1676(3) | -0.5487(3) | 0.02251(12)  | 0.0252(4) | Uani 1 1 d . . .    |
| C14 C  | -0.1331(3) | -0.4869(3) | 0.08570(11)  | 0.0217(4) | Uani 1 1 d . . .    |
| H14A H | -0.0699    | -0.5410    | 0.1176       | 0.026     | Uiso 1 1 calc R . . |
| C15 C  | -0.1911(2) | -0.3438(3) | 0.10313(11)  | 0.0194(4) | Uani 1 1 d . . .    |
| C16 C  | -0.1596(2) | -0.2866(2) | 0.17521(10)  | 0.0179(4) | Uani 1 1 d . . .    |
| H16A H | -0.1693    | -0.3735    | 0.2079       | 0.021     | Uiso 1 1 calc R . . |

\_atom\_site\_aniso\_label

\_atom\_site\_aniso\_U\_11

\_atom\_site\_aniso\_U\_22

\_atom\_site\_aniso\_U\_33

\_atom\_site\_aniso\_U\_23

\_atom\_site\_aniso\_U\_13

\_atom\_site\_aniso\_U\_12

|     |             |             |             |              |              |             |
|-----|-------------|-------------|-------------|--------------|--------------|-------------|
| Br1 | 0.04343(15) | 0.03449(13) | 0.03363(13) | -0.01411(12) | -0.00080(11) | 0.00400(11) |
| O1  | 0.0200(8)   | 0.0270(8)   | 0.0298(8)   | -0.0056(6)   | -0.0002(6)   | -0.0058(6)  |
| O2  | 0.0142(6)   | 0.0270(8)   | 0.0271(7)   | -0.0007(6)   | -0.0026(6)   | 0.0003(6)   |
| C1  | 0.0240(12)  | 0.0335(13)  | 0.0508(16)  | -0.0099(12)  | -0.0003(12)  | 0.0032(10)  |
| C2  | 0.0244(11)  | 0.0280(11)  | 0.0333(13)  | -0.0052(9)   | 0.0049(9)    | 0.0011(9)   |
| C3  | 0.0208(11)  | 0.0211(10)  | 0.0270(11)  | -0.0036(8)   | 0.0003(8)    | 0.0024(8)   |
| C4  | 0.0268(12)  | 0.0288(11)  | 0.0287(12)  | -0.0076(9)   | 0.0033(10)   | 0.0003(10)  |
| C5  | 0.0162(10)  | 0.0184(9)   | 0.0230(10)  | -0.0016(7)   | -0.0009(8)   | -0.0019(7)  |
| C6  | 0.0299(11)  | 0.0249(11)  | 0.0202(9)   | -0.0005(8)   | -0.0035(8)   | 0.0044(9)   |
| C7  | 0.0162(9)   | 0.0199(9)   | 0.0192(9)   | 0.0008(7)    | -0.0010(8)   | -0.0001(8)  |
| C8  | 0.0264(11)  | 0.0210(10)  | 0.0246(10)  | 0.0017(8)    | -0.0017(9)   | 0.0023(9)   |
| C9  | 0.0269(12)  | 0.0284(11)  | 0.0233(10)  | 0.0060(9)    | -0.0050(9)   | 0.0029(9)   |
| C10 | 0.0180(9)   | 0.0297(11)  | 0.0190(9)   | 0.0049(8)    | 0.0005(7)    | -0.0017(9)  |
| C11 | 0.0243(11)  | 0.0389(12)  | 0.0195(11)  | 0.0048(9)    | -0.0032(9)   | -0.0024(8)  |
| C12 | 0.0293(12)  | 0.0408(13)  | 0.0176(9)   | -0.0040(9)   | 0.0008(9)    | -0.0079(11) |
| C13 | 0.0230(10)  | 0.0289(11)  | 0.0236(10)  | -0.0063(8)   | 0.0048(8)    | -0.0038(9)  |
| C14 | 0.0198(10)  | 0.0240(10)  | 0.0213(10)  | -0.0010(8)   | 0.0002(8)    | 0.0000(8)   |
| C15 | 0.0145(9)   | 0.0247(10)  | 0.0189(9)   | 0.0010(8)    | -0.0005(7)   | -0.0025(7)  |

C16 0.0169(9) 0.0185(9) 0.0183(9) 0.0001(7) -0.0015(8) -0.0007(7)

\_geom\_special\_details

All esds (except the esd in the dihedral angle between two l.s. planes) are estimated using the full covariance matrix. The cell esds are taken into account individually in the estimation of esds in distances, angles and torsion angles; correlations between esds in cell parameters are only used when they are defined by crystal symmetry. An approximate (isotropic) treatment of cell esds is used for estimating esds involving l.s. planes.

\_geom\_bond\_atom\_site\_label\_1

\_geom\_bond\_atom\_site\_label\_2

\_geom\_bond\_distance

\_geom\_bond\_site\_symmetry\_2

\_geom\_bond\_publ\_flag

Br1 C13 1.900(2) . ?

O1 C5 1.448(2) . ?

O2 C16 1.446(2) . ?

C1 C2 1.312(4) . ?

C2 C3 1.504(3) . ?

C3 C4 1.530(3) . ?

C3 C5 1.546(3) . ?

C5 C6 1.532(3) . ?

C5 C7 1.549(3) . ?

C7 C16 1.518(3) . ?

C7 C8 1.532(3) . ?

C8 C9 1.517(3) . ?

C9 C10 1.516(3) . ?

C10 C15 1.388(3) . ?

C10 C11 1.395(3) . ?

C11 C12 1.377(3) . ?

C12 C13 1.390(4) . ?

C13 C14 1.373(3) . ?

C14 C15 1.401(3) . ?

C15 C16 1.510(3) . ?

\_geom\_angle\_atom\_site\_label\_1

\_geom\_angle\_atom\_site\_label\_2

\_geom\_angle\_atom\_site\_label\_3

\_geom\_angle

\_geom\_angle\_site\_symmetry\_1

\_geom\_angle\_site\_symmetry\_3

\_geom\_angle\_publ\_flag

C1 C2 C3 126.1(3) . . ?

|             |                 |
|-------------|-----------------|
| C2 C3 C4    | 109.1(2) .. ?   |
| C2 C3 C5    | 112.21(17) .. ? |
| C4 C3 C5    | 112.92(19) .. ? |
| O1 C5 C6    | 108.63(17) .. ? |
| O1 C5 C3    | 106.36(16) .. ? |
| C6 C5 C3    | 110.80(18) .. ? |
| O1 C5 C7    | 108.37(17) .. ? |
| C6 C5 C7    | 111.64(17) .. ? |
| C3 C5 C7    | 110.84(18) .. ? |
| C16 C7 C8   | 108.05(17) .. ? |
| C16 C7 C5   | 113.22(17) .. ? |
| C8 C7 C5    | 115.12(17) .. ? |
| C9 C8 C7    | 110.33(18) .. ? |
| C10 C9 C8   | 113.43(18) .. ? |
| C15 C10 C11 | 119.0(2) .. ?   |
| C15 C10 C9  | 120.57(19) .. ? |
| C11 C10 C9  | 120.4(2) .. ?   |
| C12 C11 C10 | 121.6(2) .. ?   |
| C11 C12 C13 | 118.6(2) .. ?   |
| C14 C13 C12 | 121.1(2) .. ?   |
| C14 C13 Br1 | 118.44(18) .. ? |
| C12 C13 Br1 | 120.50(18) .. ? |
| C13 C14 C15 | 119.9(2) .. ?   |
| C10 C15 C14 | 119.7(2) .. ?   |
| C10 C15 C16 | 122.6(2) .. ?   |
| C14 C15 C16 | 117.58(19) .. ? |
| O2 C16 C15  | 111.25(16) .. ? |
| O2 C16 C7   | 108.59(16) .. ? |
| C15 C16 C7  | 112.10(17) .. ? |

\_geom\_hbond\_atom\_site\_label\_D

\_geom\_hbond\_atom\_site\_label\_H

\_geom\_hbond\_atom\_site\_label\_A

\_geom\_hbond\_distance\_DH

\_geom\_hbond\_distance\_HA

\_geom\_hbond\_distance\_DA

\_geom\_hbond\_angle\_DHA

\_geom\_hbond\_site\_symmetry\_A

O1 H1A O2 0.84 2.10 2.786(2) 138.8 .

O2 H2A O1 0.84 2.02 2.810(2) 155.9 3\_545

\_diffn\_measured\_fraction\_theta\_max 0.975

\_diffn\_reflns\_theta\_full 32.68

|                                     |        |
|-------------------------------------|--------|
| _diffn_measured_fraction_theta_full | 0.975  |
| _refine_diff_density_max            | 0.743  |
| _refine_diff_density_min            | -0.432 |
| _refine_diff_density_rms            | 0.082  |

## Determination of regiochemistry in compounds 14-19:

The regioselectivity was assigned by observing relevant correlations in the HMBC spectra for compounds 14-19 (see below).

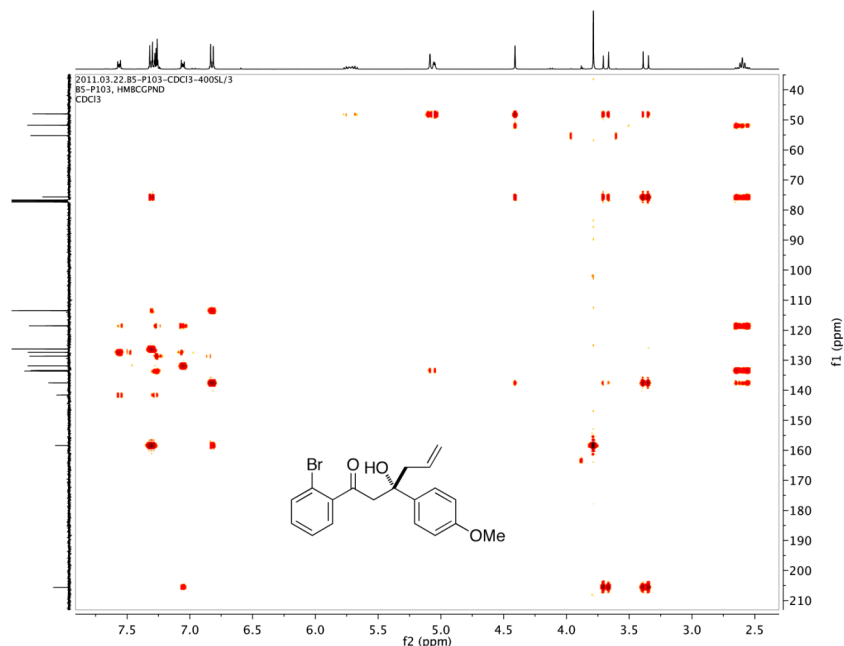

Supplementary Figure 6 | HMBC spectrum of compound 14.

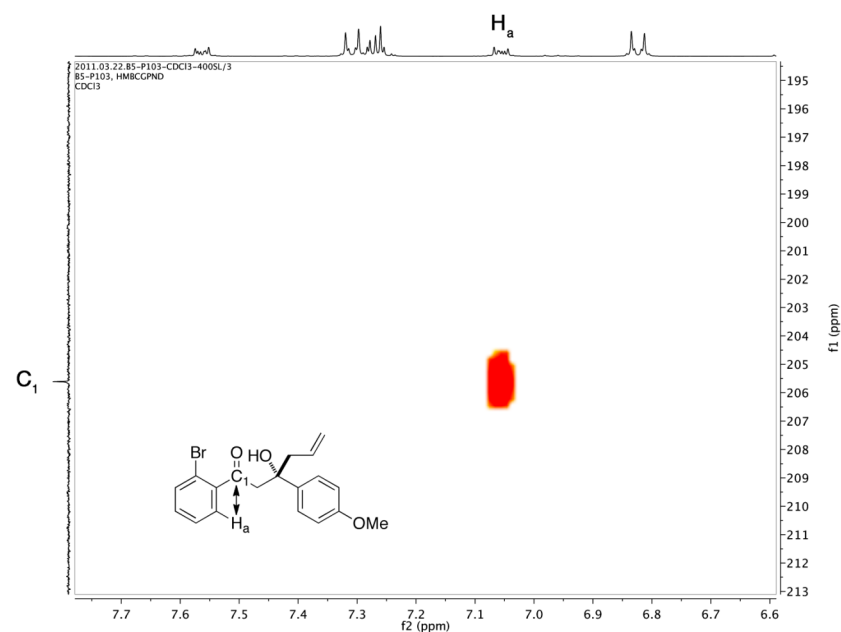

Supplementary Figure 7 | Expanded HMBC spectrum for compound 14 showing the  $H_a \leftrightarrow C_1$  correlation. ( $H_a$  is believed to be shifted upfield due to the same reason we observe regioselectivity; steric inhibition of resonance (SIR) causing the aryl ring to twist out of planarity).

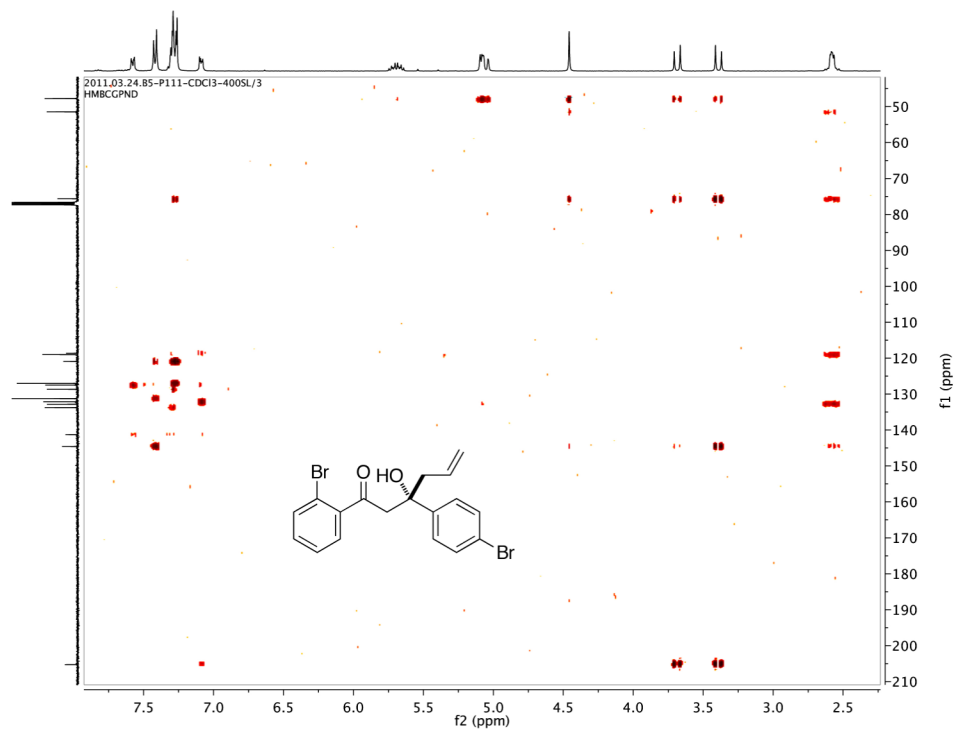

**Supplementary Figure 8** | HMBC spectrum of compound **15**.

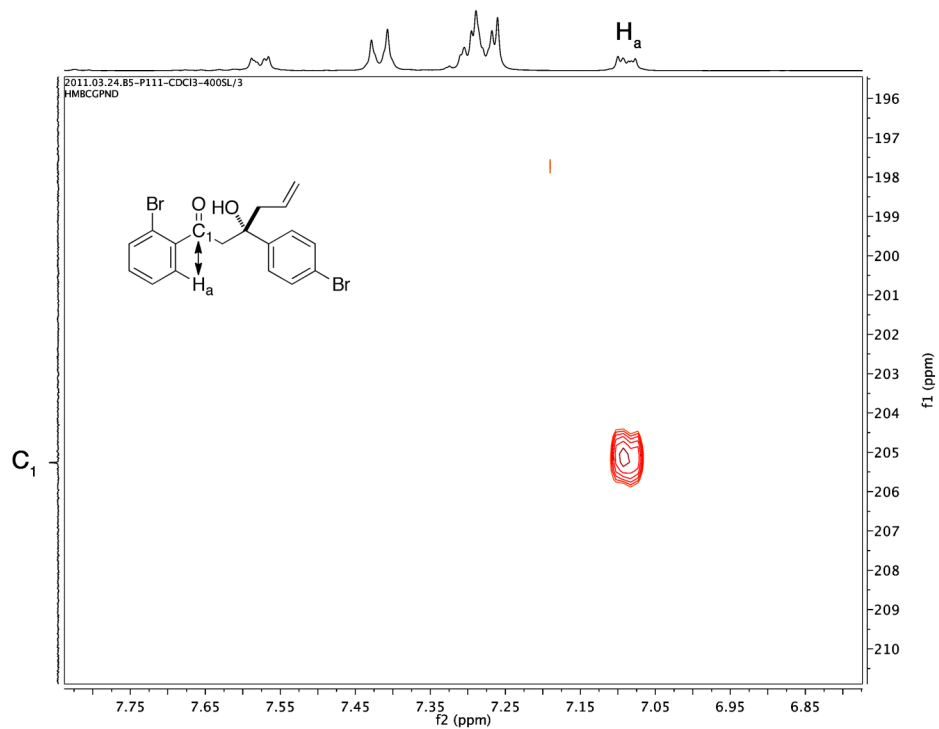

**Supplementary Figure 9** | Expanded HMBC spectrum for compound **15** showing the  $H_a \leftrightarrow C_1$  correlation.

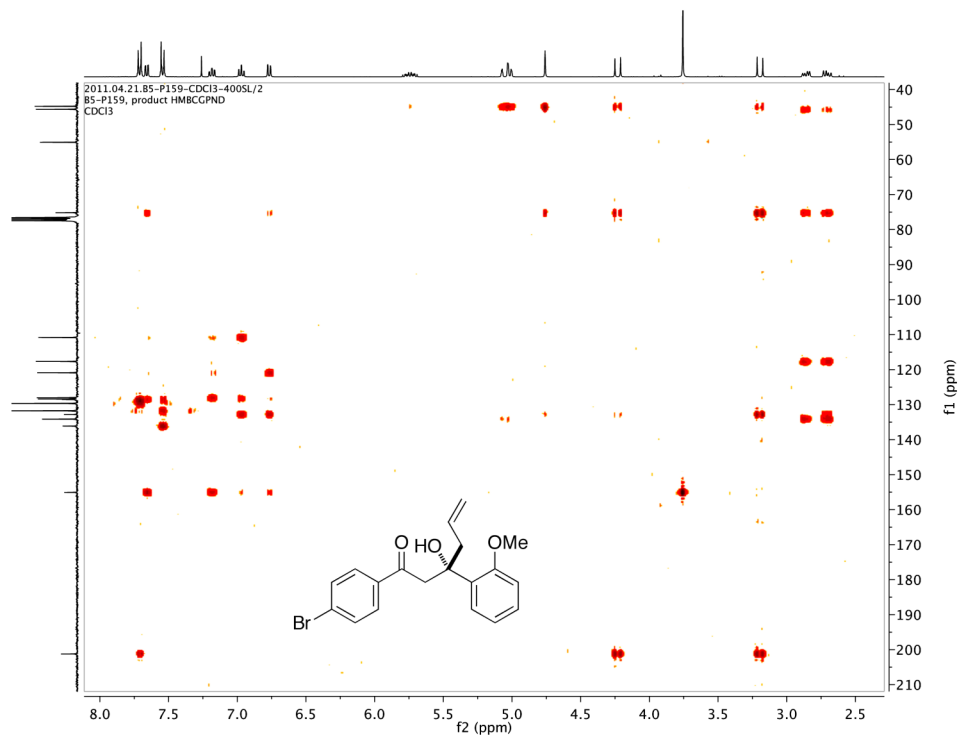

Supplementary Figure 10 | HMBC spectrum of compound 16a.

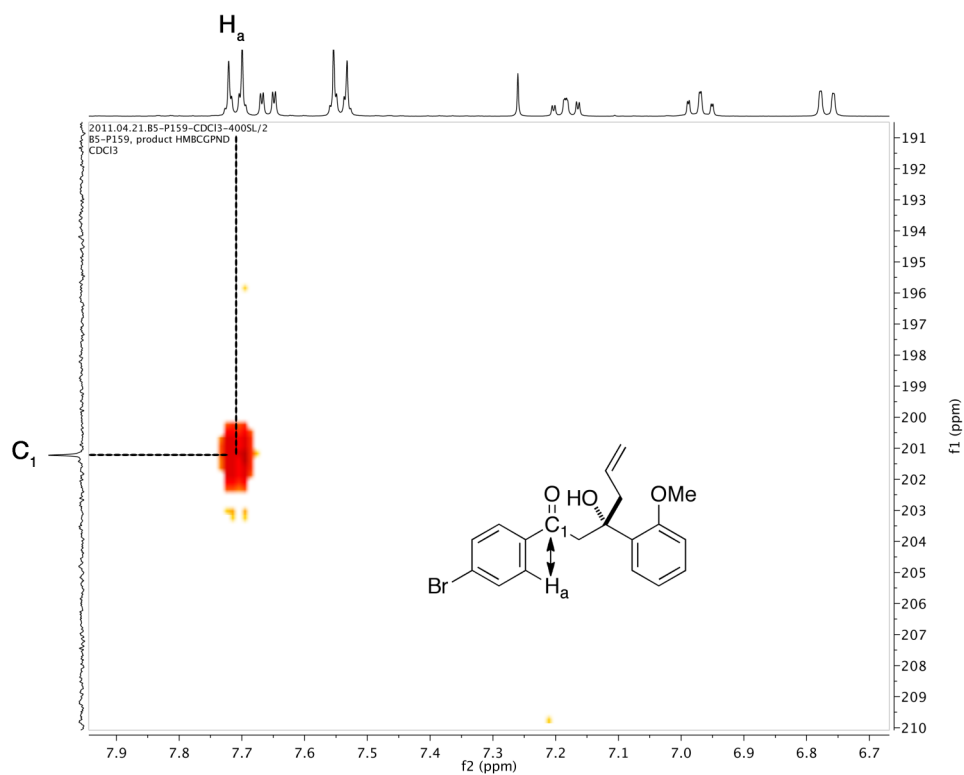

Supplementary Figure 11 | Expanded HMBC spectrum for compound 16a showing the  $H_a \leftrightarrow C_1$  correlation.



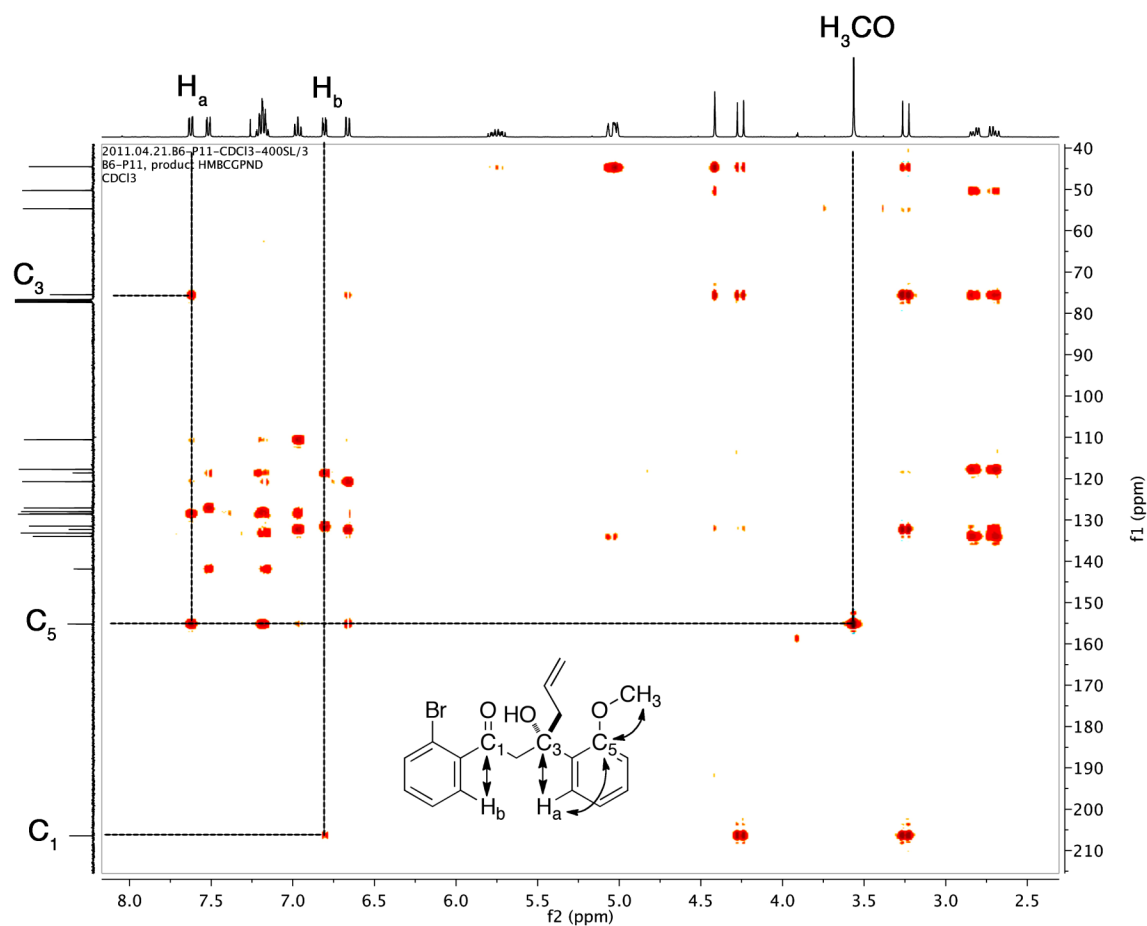

**Supplementary Figure 12** | HMBC spectrum of compound **17**. Using the methyl group as an entry point for solving the regiochemistry of allylation we see that there is a  $\text{CH}_3 \leftrightarrow \text{C}_5$  correlation, which in turn leads us to the  $\text{C}_5 \leftrightarrow \text{H}_a$  correlation. Now that we have assigned  $\text{H}_a$  we can see that there is a  $\text{H}_a \leftrightarrow \text{C}_3$  correlation, confirming the regiochemistry shown (dotted lines added as a guide to the eye to point out relevant correlations in assigning the structure).

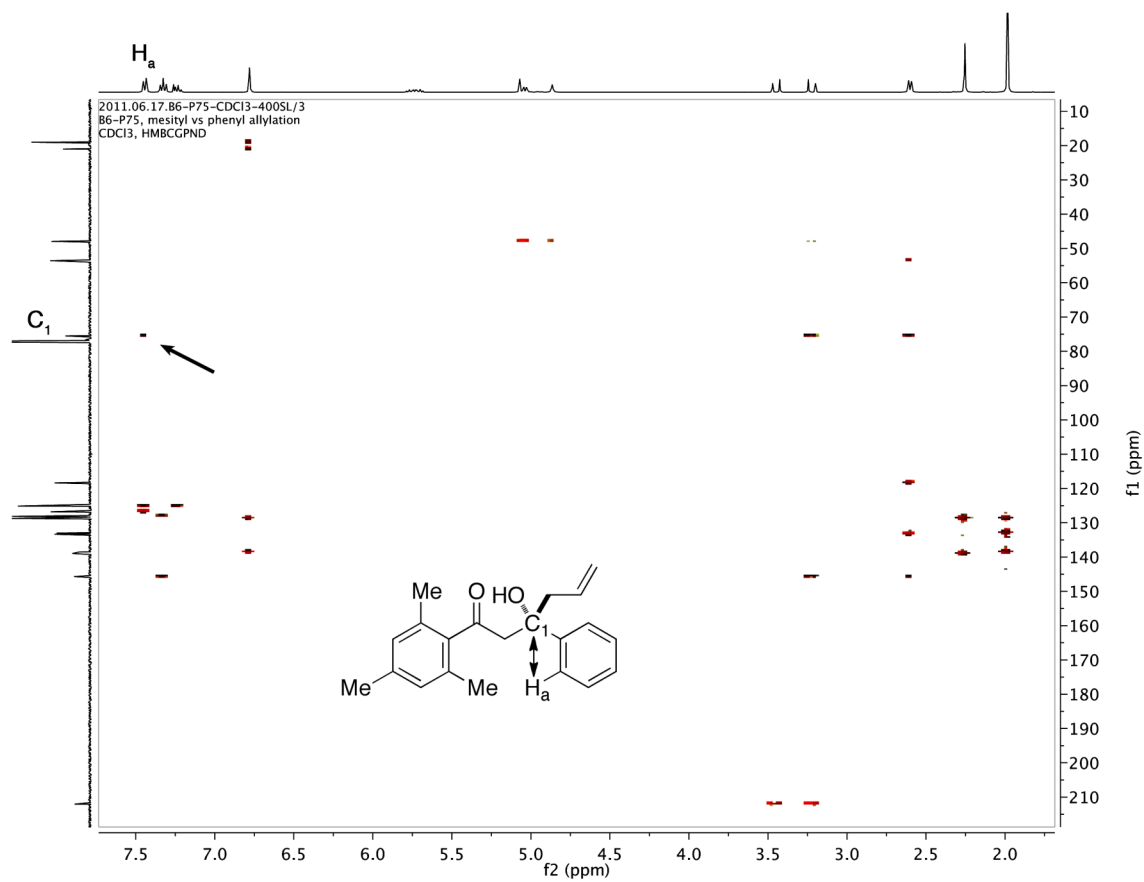

**Supplementary Figure 13** | HMBC spectrum of compound **18** showing the  $H_a \leftrightarrow C_1$  correlation (arrow).

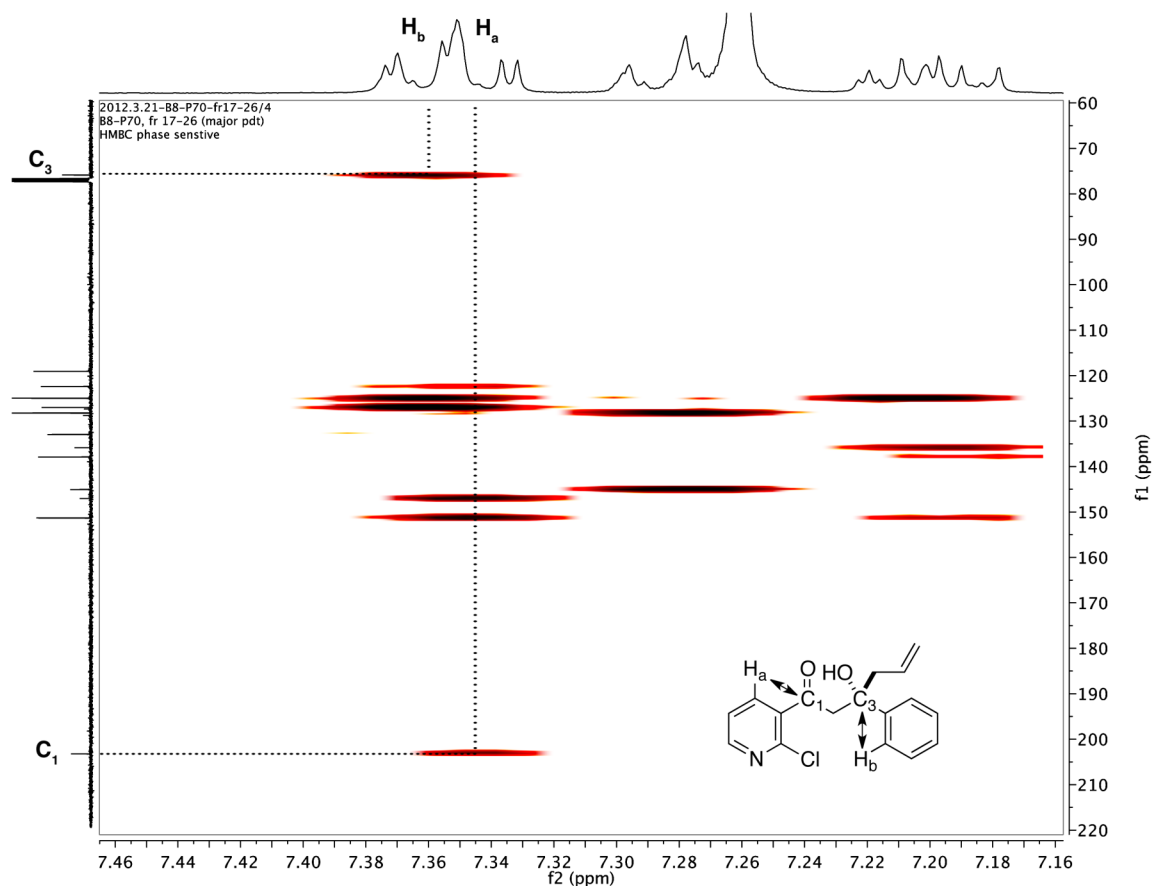

**Supplementary Figure 14** | HMBC spectrum of compound **19**. One can see that there is ambiguity in the assignment of regiochemistry due to the similar chemical shifts of  $H_a$  and  $H_b$ . Although we can make a regiochemical assignment with confidence based on peak shape and the slight chemical shift difference, we can make a more convincing argument by looking at chemical shifts of  $H_b$  as well as HMBC correlations for the minor regioisomer of **19** (see Supplementary Figure 13).

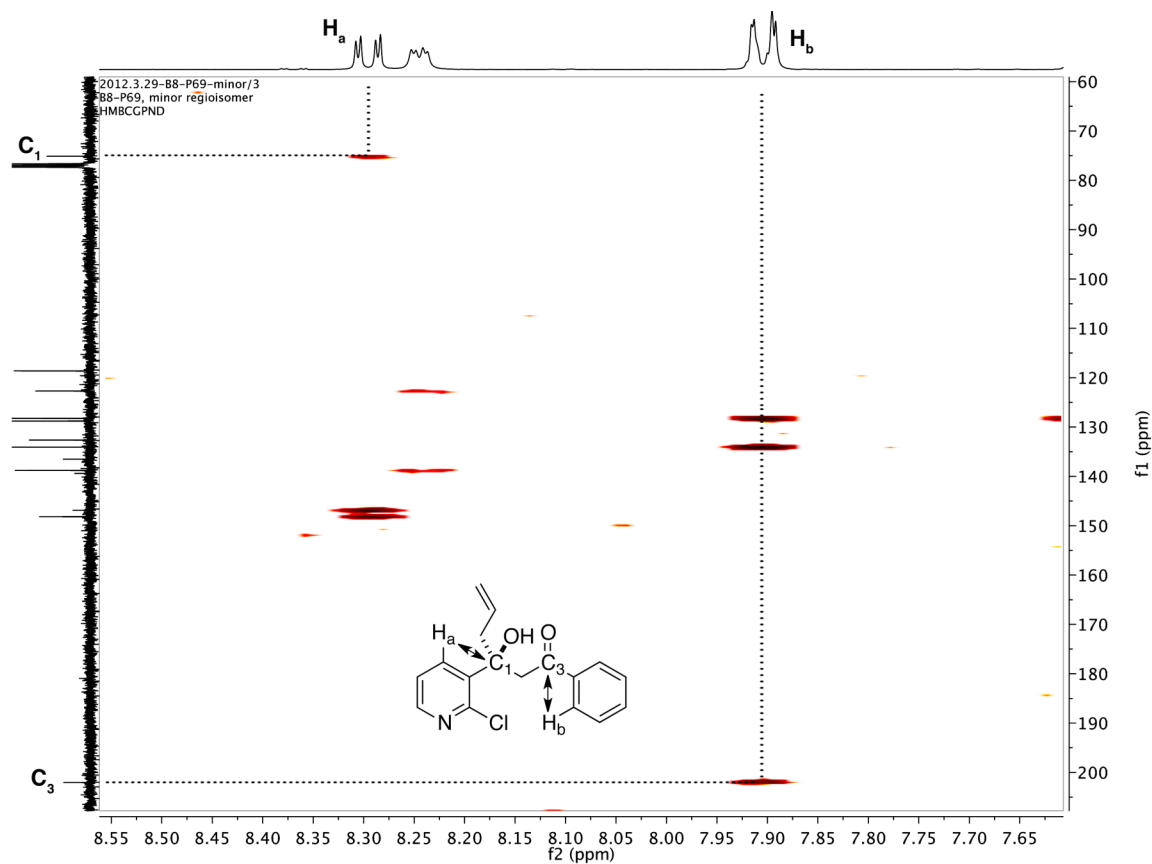

**Supplementary Figure 15** | HMBC spectrum of the minor regioisomer from the allylation reaction to form compound **19**. One can clearly see the  $H_a \leftrightarrow C_1$  correlation ( $H_a$  integration = 1) and the  $H_b \leftrightarrow C_3$  correlation ( $H_b$  integration = 2). Since the regiochemical assignment of compound **19** is ambiguous, the clear assignment of the minor regioisomer shown above removes any doubt of the regioselectivity and major isomer formed in this reaction.

## Determination of enantioselectivities:

**NOTE:** Racemic samples of the allylated products were either prepared following the procedure developed by Bartoli et al.<sup>34</sup> or using racemic allylsilane **3**, prepared by mixing equimolar amounts of allylsilane reagent (*S,S*)-**3** and (*R,R*)-**3**. Racemic samples of crotylated products were prepared by carrying out the crotylation reactions with racemic *cis*-**20** or *trans*-**21**, prepared by mixing equimolar amounts of the (*S,S*)- and (*R,R*)-crotylsilanes **20** or **21**. Slight deviations from 50:50 in the racemic GC or HPLC traces may therefore be attributed to the error inherent in this procedure.

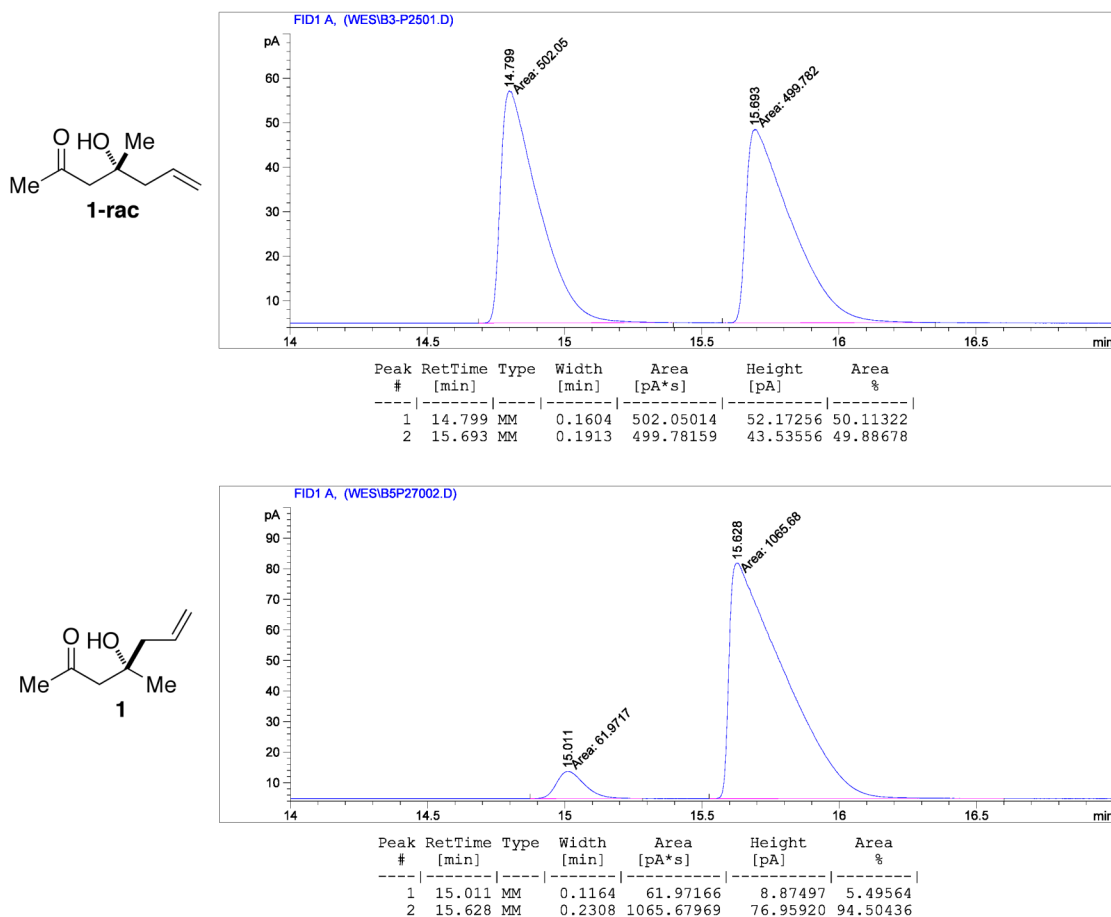

Supplementary Figure 16 | GC trace of **1** ( $\beta$ -dex 325, 1 mL/min, 90 °C isothermal).

<sup>34</sup> Bartoli, G.; Marcantoni, E.; Petrini, M. *Angew. Chem. Int. Ed. Engl.* **1993**, *32*, 1061.

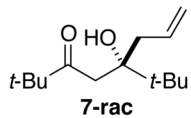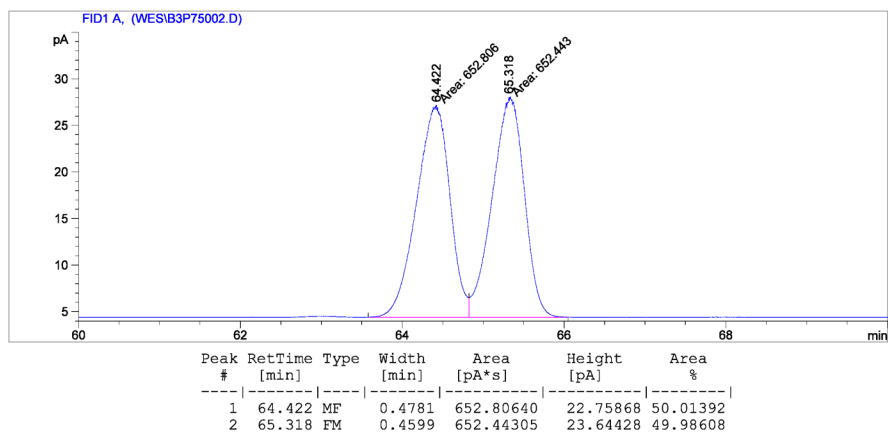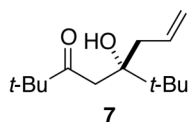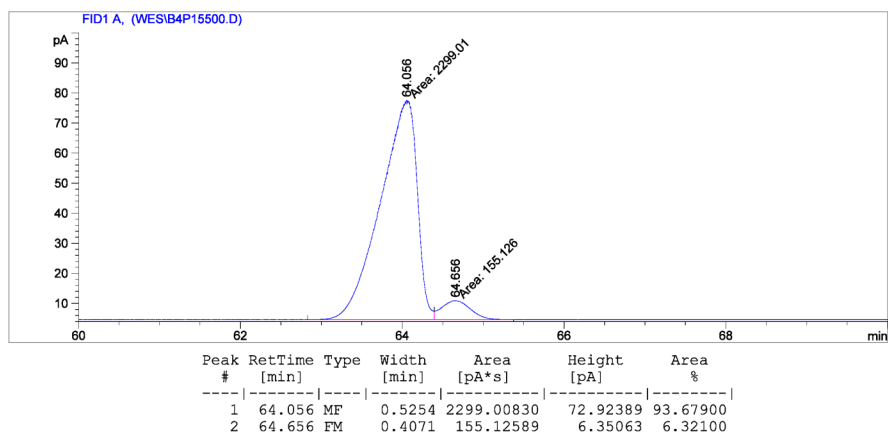

Supplementary Figure 17 | GC trace of 7 ( $\beta$ -dex 325, 1 mL/min, 100 °C isothermal).

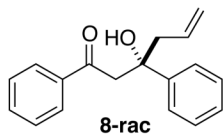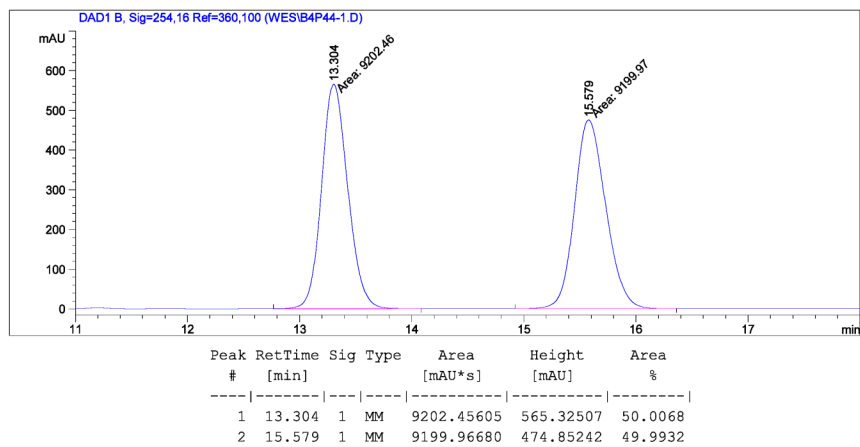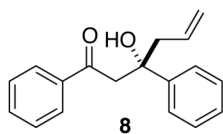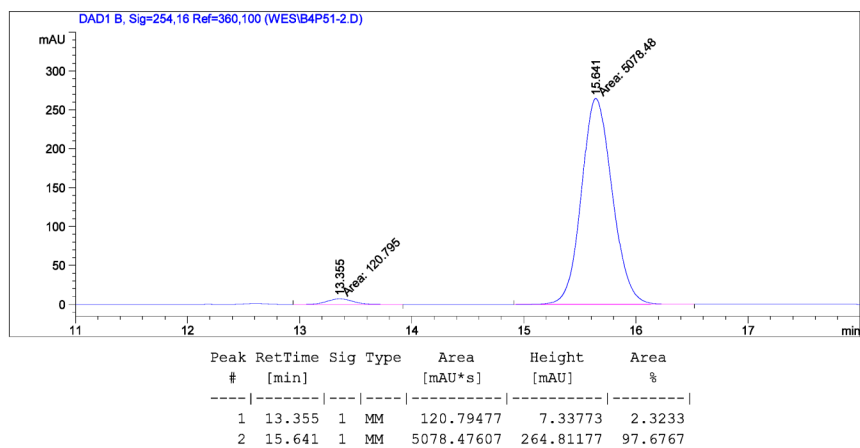

**Supplementary Figure 18** | HPLC trace of **8** (Chiralpak AD-H, Hexanes:*i*-PrOH = 97:3, 1 mL/min, 254 nm).

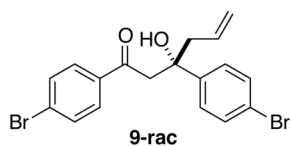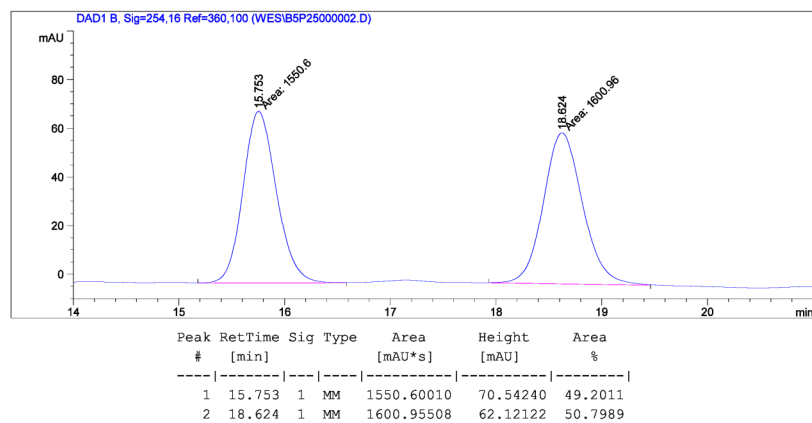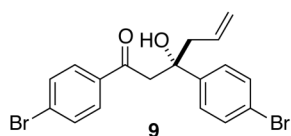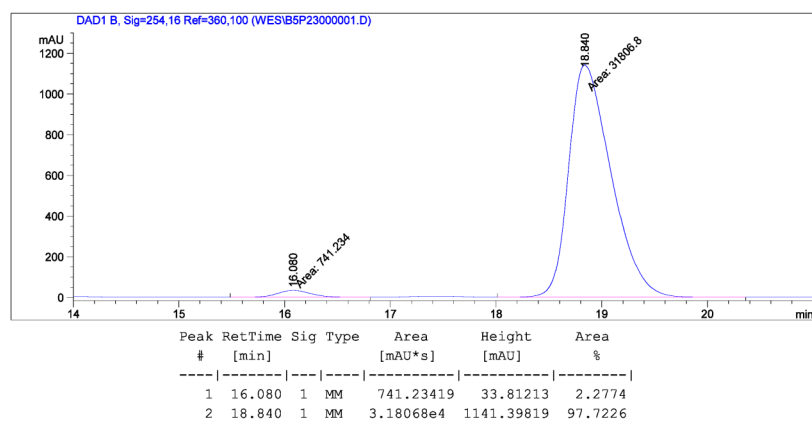

**Supplementary Figure 19** | HPLC trace of **9** (Chiralpak AD-H, Hexanes:*i*-PrOH = 96:4, 1 mL/min, 254 nm).



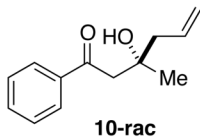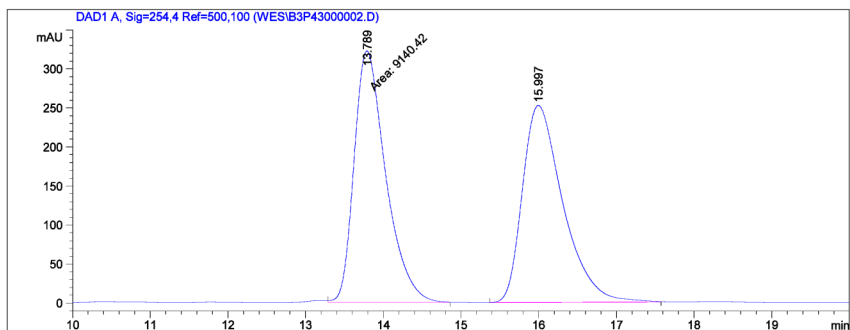

| Peak # | RetTime [min] | Sig | Type | Area [mAU*s] | Height [mAU] | Area %  |
|--------|---------------|-----|------|--------------|--------------|---------|
| 1      | 13.789        | 1   | FM   | 9140.42285   | 322.36642    | 50.0088 |
| 2      | 15.997        | 1   | BB   | 9137.22363   | 252.45828    | 49.9912 |

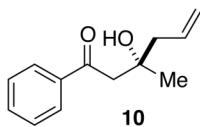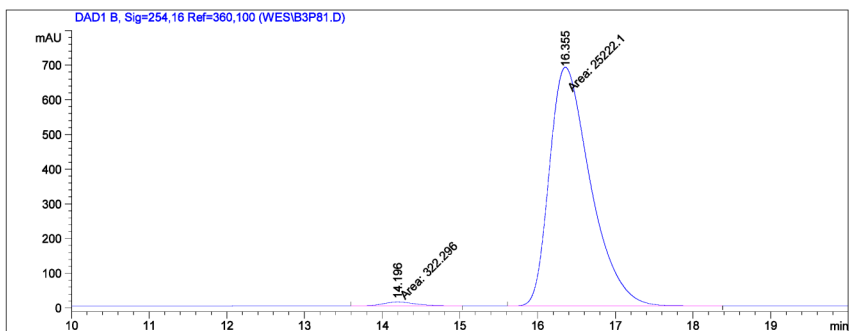

| Peak # | RetTime [min] | Sig | Type | Area [mAU*s] | Height [mAU] | Area %  |
|--------|---------------|-----|------|--------------|--------------|---------|
| 1      | 14.196        | 1   | MM   | 322.29633    | 11.18189     | 1.2617  |
| 2      | 16.355        | 1   | MM   | 2.52221e4    | 688.07141    | 98.7383 |

**Supplementary Figure 20** | HPLC trace of **10** (Chiralcel OD, Hexanes:*i*-PrOH = 98:2, 1 mL/min, 254 nm).

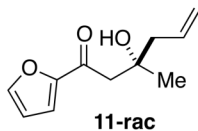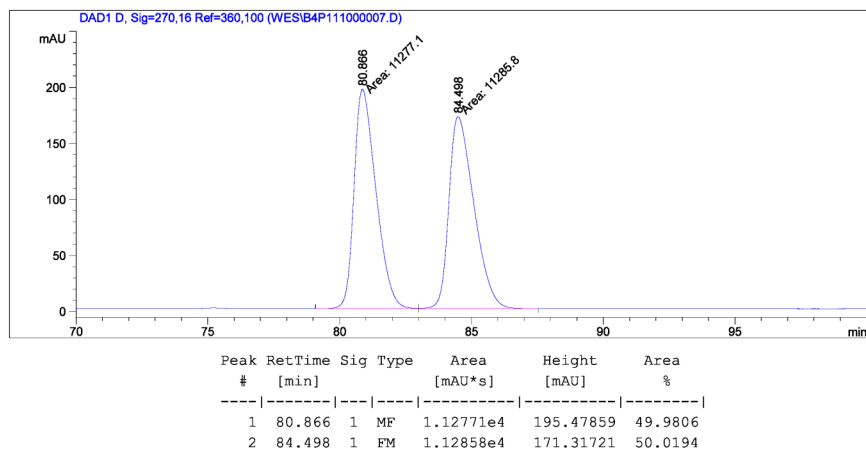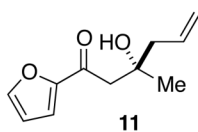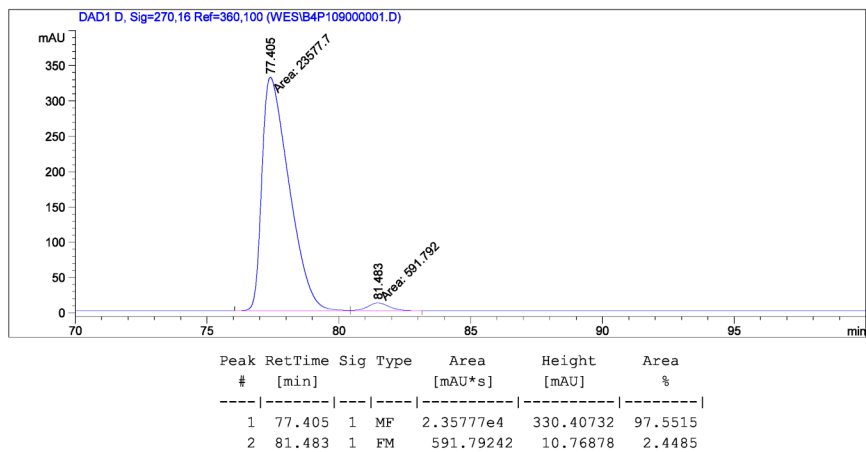

**Supplementary Figure 21** | HPLC trace of **11** (Chiralpak AD-H, Hexanes:*i*-PrOH = 99:1 for 30 min then ramp to 98:2 over 30 min and hold, 1 mL/min, 270 nm).

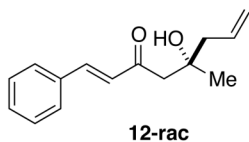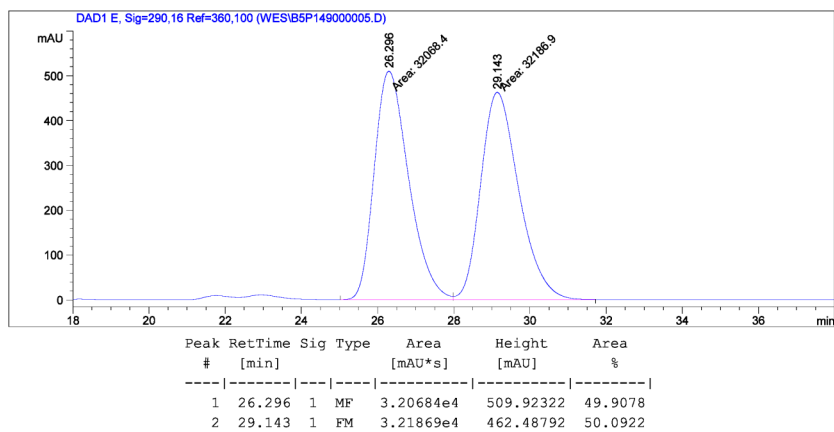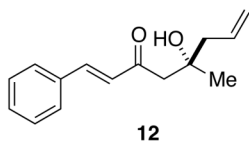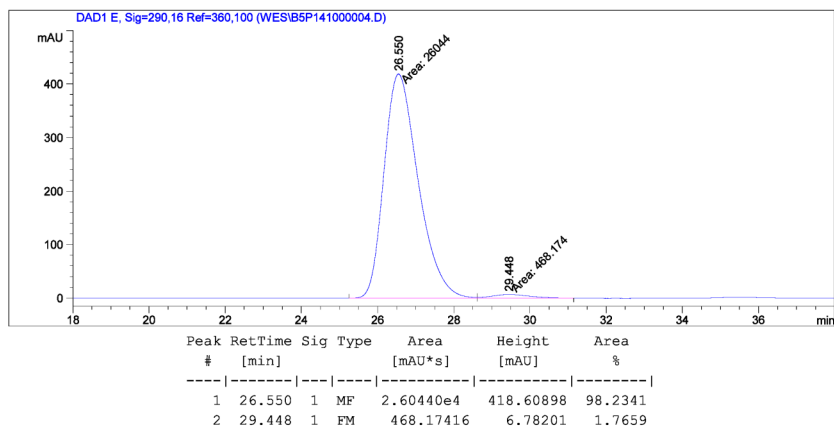

**Supplementary Figure 22** | HPLC trace of **12** (Chiralcel OD, Hexanes:*i*-PrOH = 97:3, 1 mL/min, 290 nm).

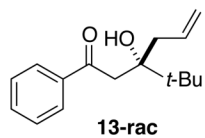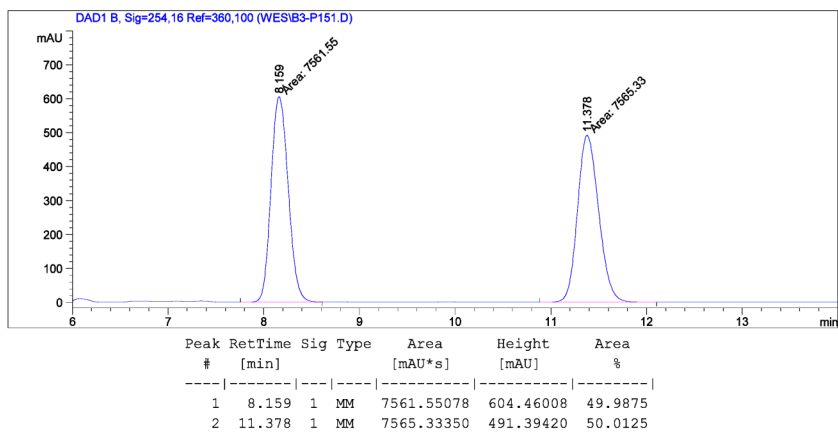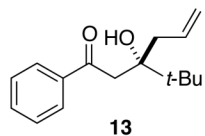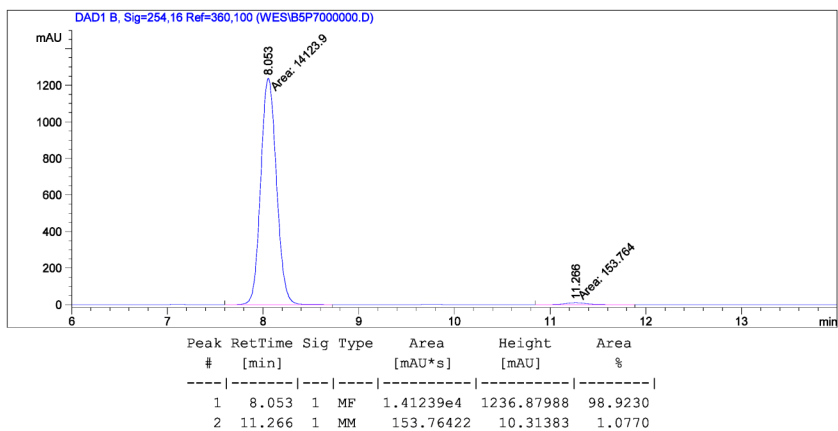

**Supplementary Figure 23** | HPLC trace of **13** (Chiralpak AD-H, Hexanes:*i*-PrOH = 98:2, 1 mL/min, 254 nm).

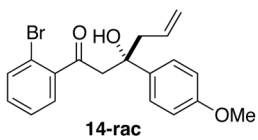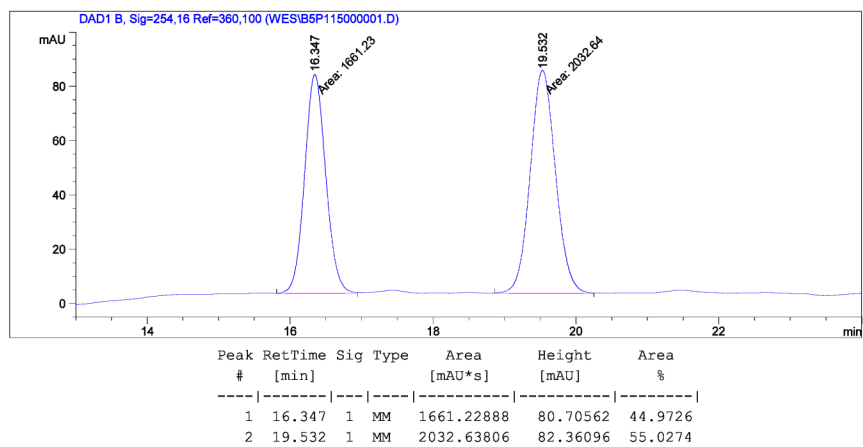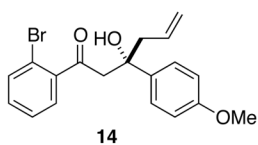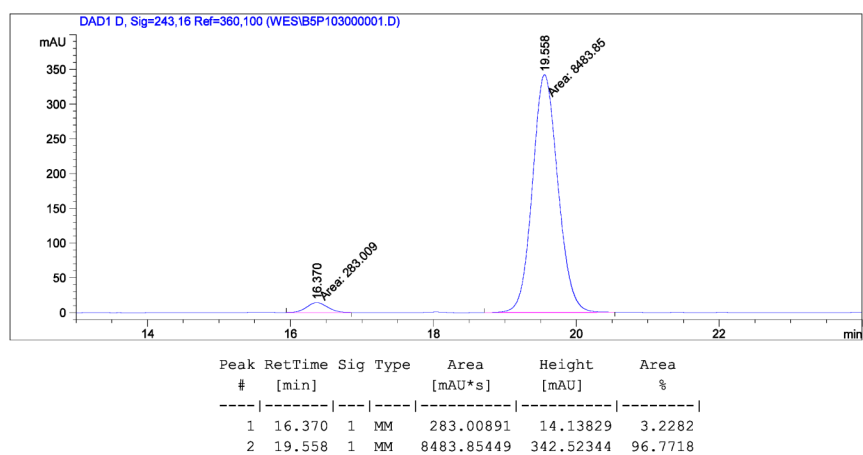

**Supplementary Figure 24** | HPLC trace of **14** (Chiralpak AD-H, Hexanes:*i*-PrOH = 96:4, 1 mL/min, 243 nm).

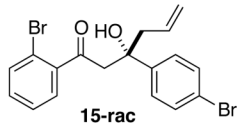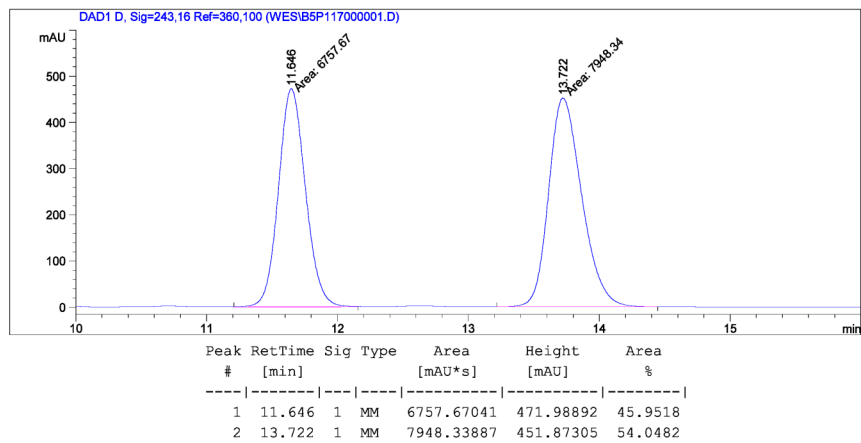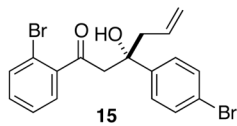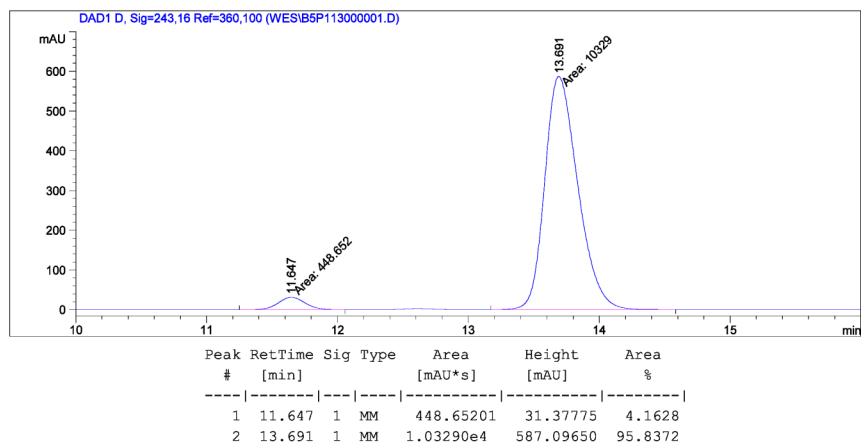

**Supplementary Figure 25** | HPLC trace of **15** (Chiralpak AD-H, Hexanes:*i*-PrOH = 96:4, 1 mL/min, 243 nm).

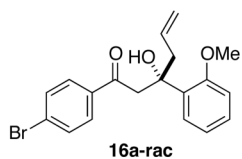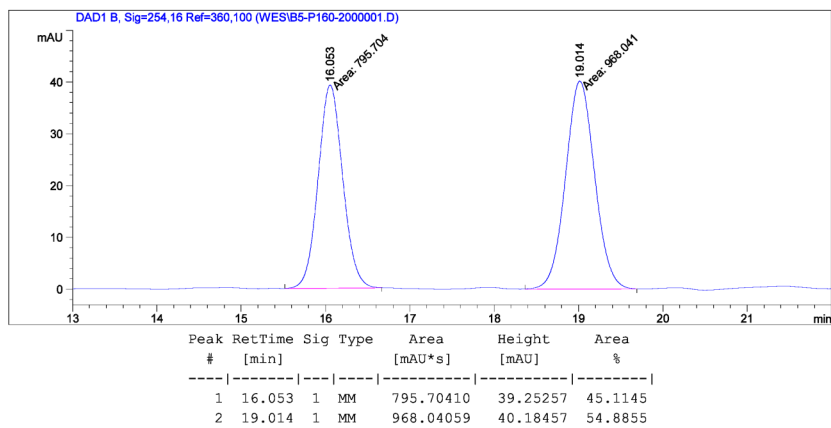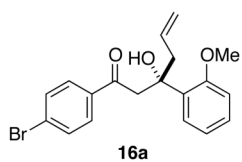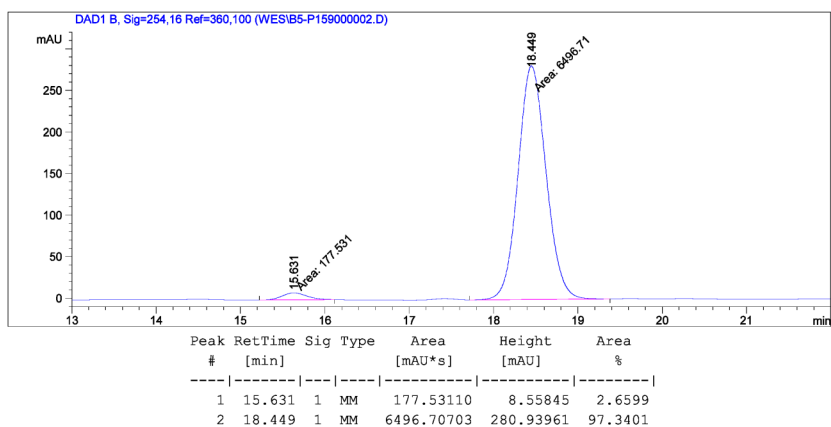

**Supplementary Figure 26** | HPLC trace of **16a** (Chiralpak AD-H, Hexanes:*i*-PrOH = 96:4, 1 mL/min, 254 nm).

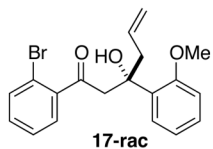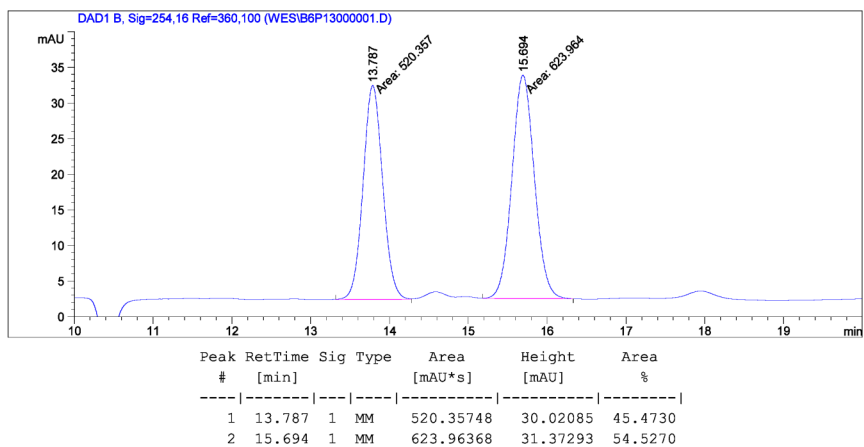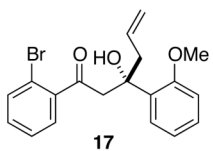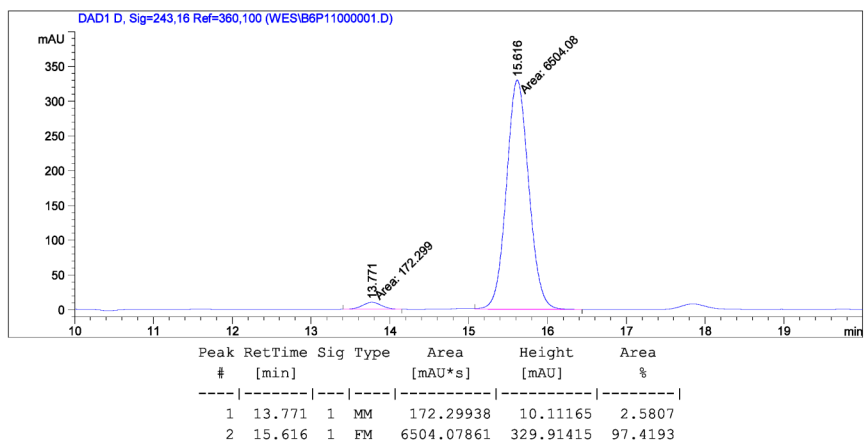

**Supplementary Figure 27** | HPLC trace of **17** (Chiralpak AD-H, Hexanes:*i*-PrOH = 96:4, 1 mL/min, 243 nm).



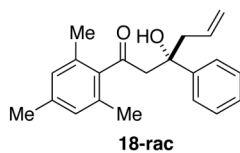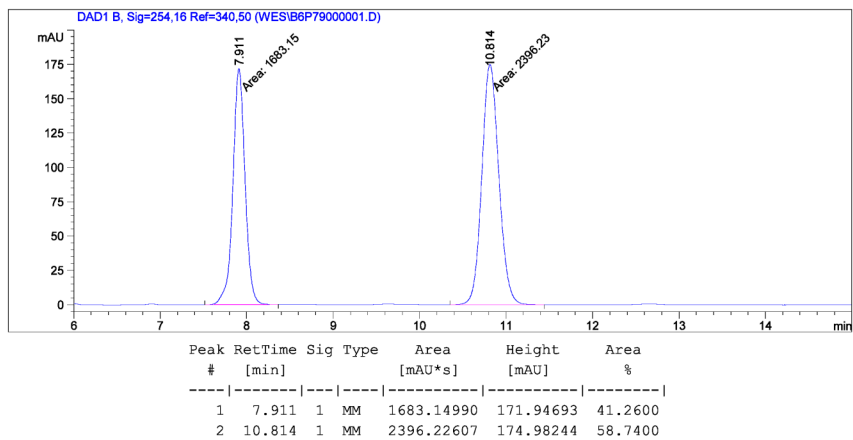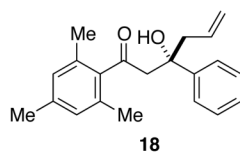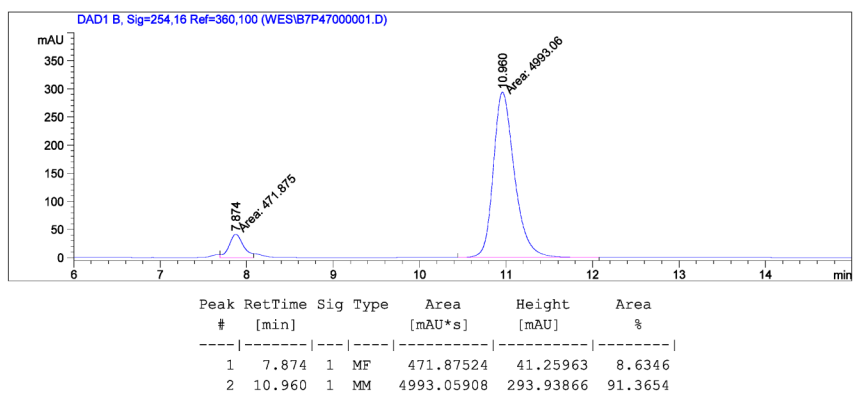

**Supplementary Figure 28** | HPLC trace of **18** (Chiralpak AD-H, Hexanes:*i*-PrOH = 98:2, 1 mL/min, 254 nm).

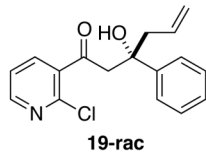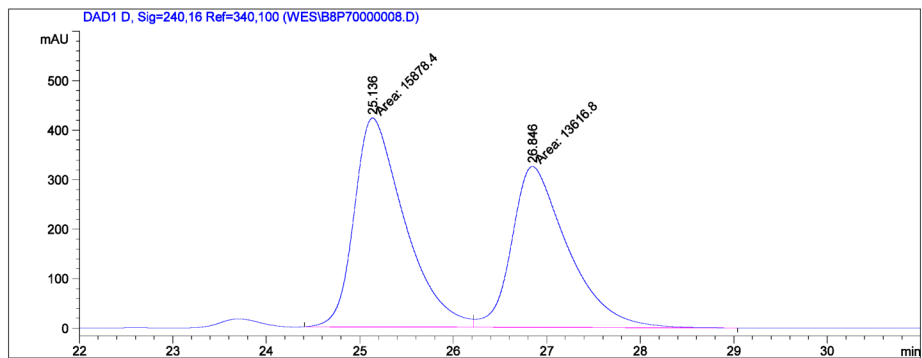

| Peak # | RetTime [min] | Sig | Type | Area [mAU*s] | Height [mAU] | Area %  |
|--------|---------------|-----|------|--------------|--------------|---------|
| 1      | 25.136        | 1   | MF   | 1.58784e4    | 422.21741    | 53.8338 |
| 2      | 26.846        | 1   | FM   | 1.36168e4    | 325.34372    | 46.1662 |

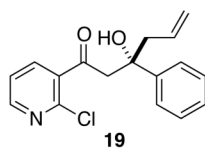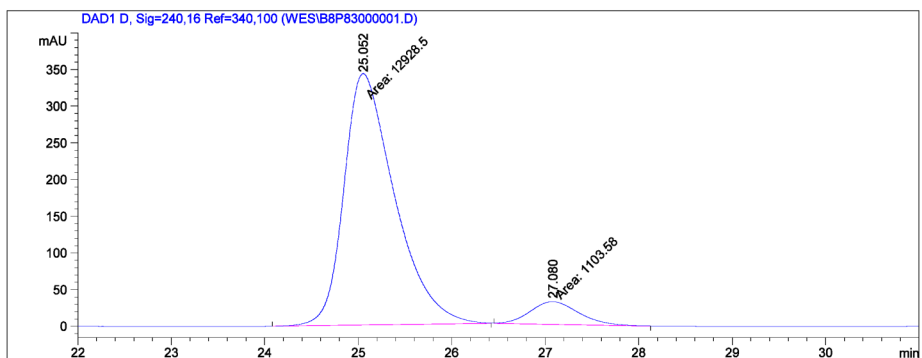

| Peak # | RetTime [min] | Sig | Type | Area [mAU*s] | Height [mAU] | Area %  |
|--------|---------------|-----|------|--------------|--------------|---------|
| 1      | 25.052        | 1   | MM   | 1.29285e4    | 342.74216    | 92.1353 |
| 2      | 27.080        | 1   | MM   | 1103.58301   | 30.82989     | 7.8647  |

**Supplementary Figure 29** | HPLC trace of **19** (Chiralpak AD-H, Hexanes:EtOH = 96:4, 1 mL/min, 240 nm).

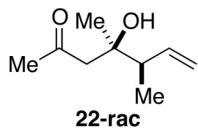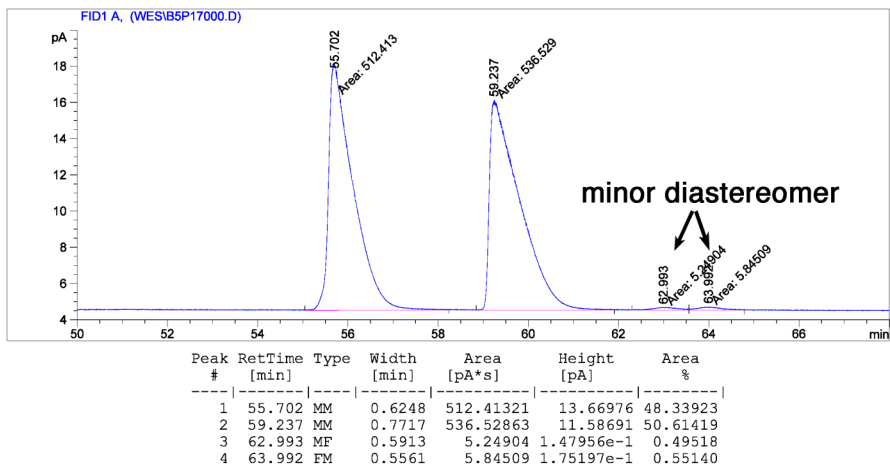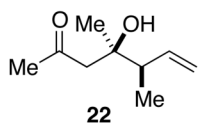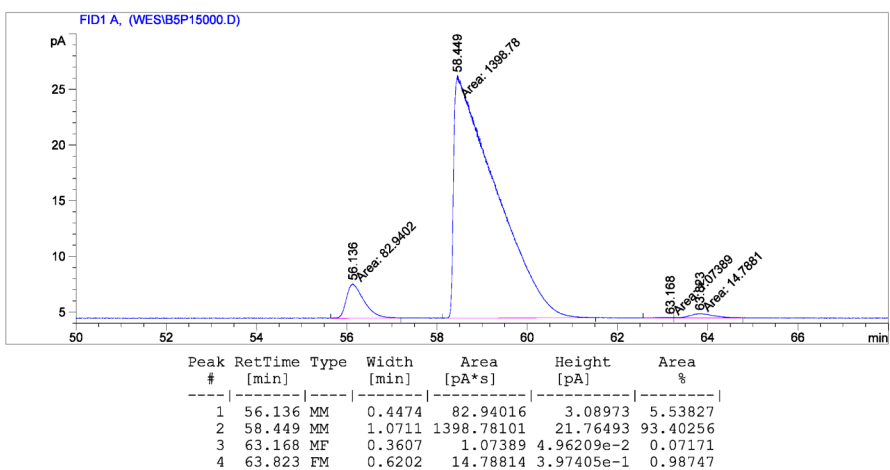

Supplementary Figure 30 | GC trace of 22 ( $\beta$ -dex 325, 1 mL/min, 70 °C isothermal).

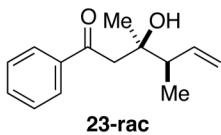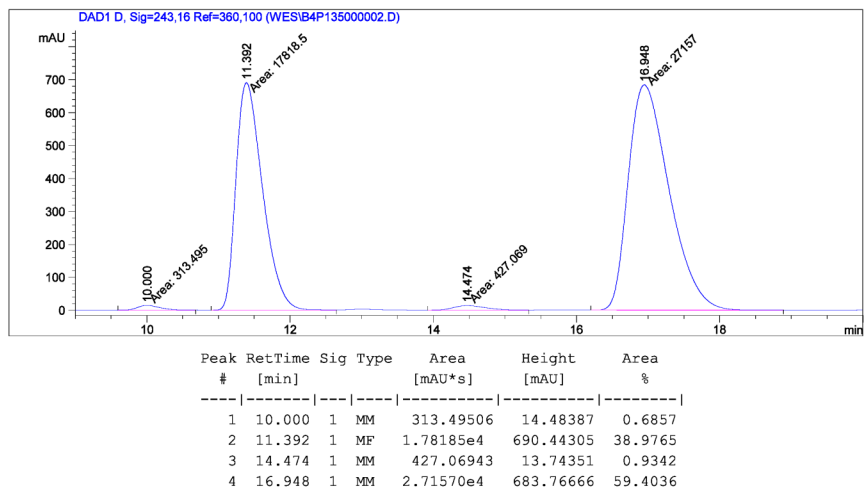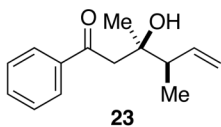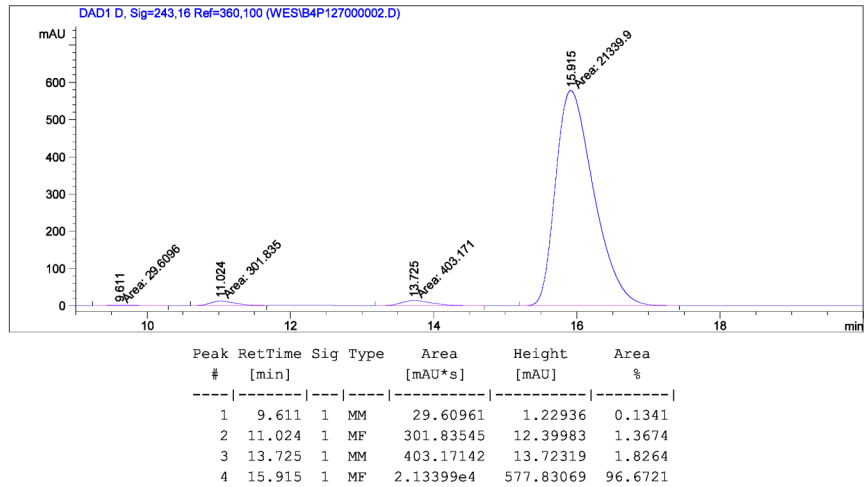

**Supplementary Figure 31** | HPLC trace of **23** (Chiralcel OD, Hexanes:*i*-PrOH = 98:2, 1 mL/min, 243 nm).

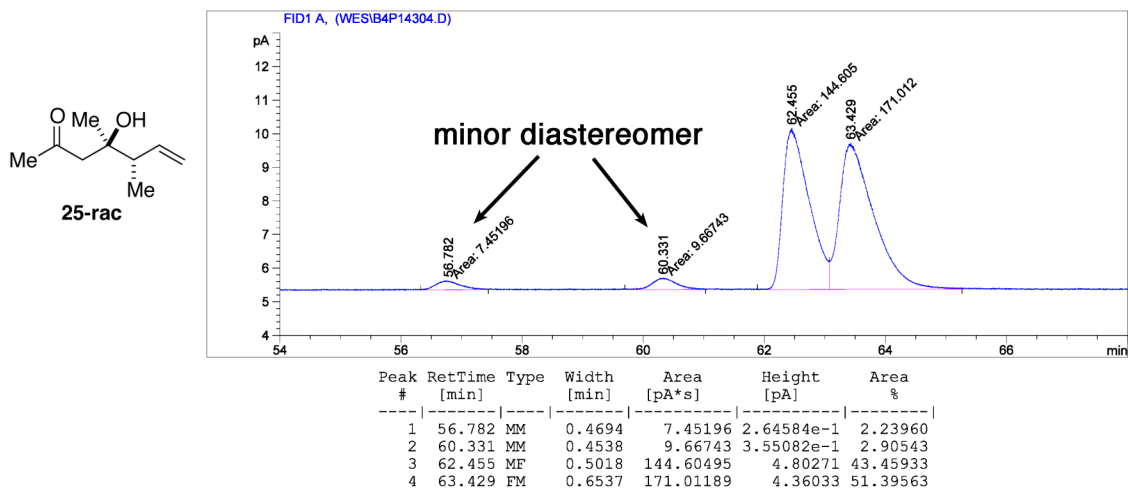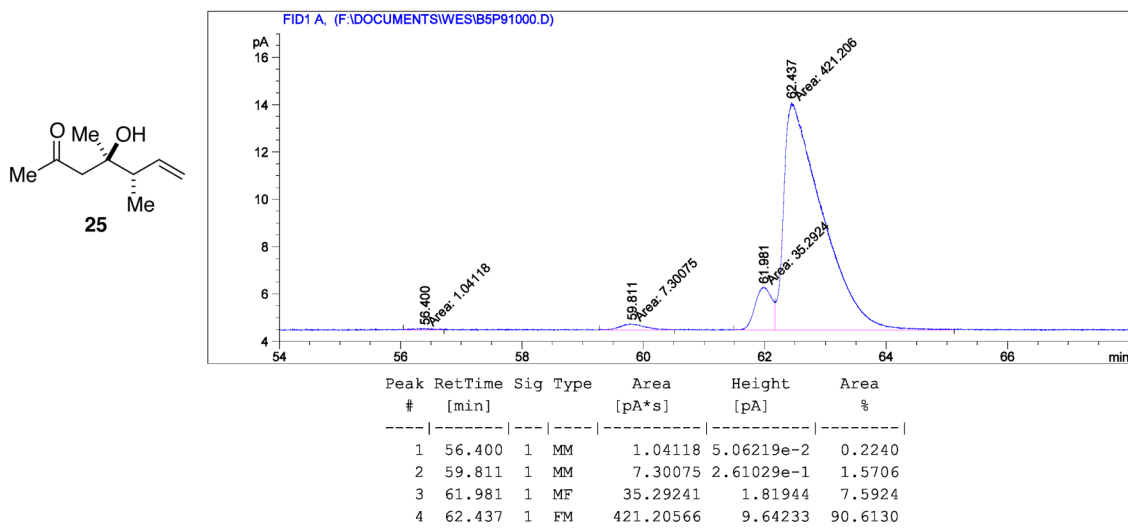

Supplementary Figure 32 | GC trace of **25** ( $\beta$ -dex 325, 1 mL/min, 70 °C isothermal).

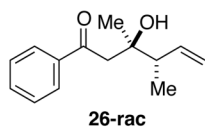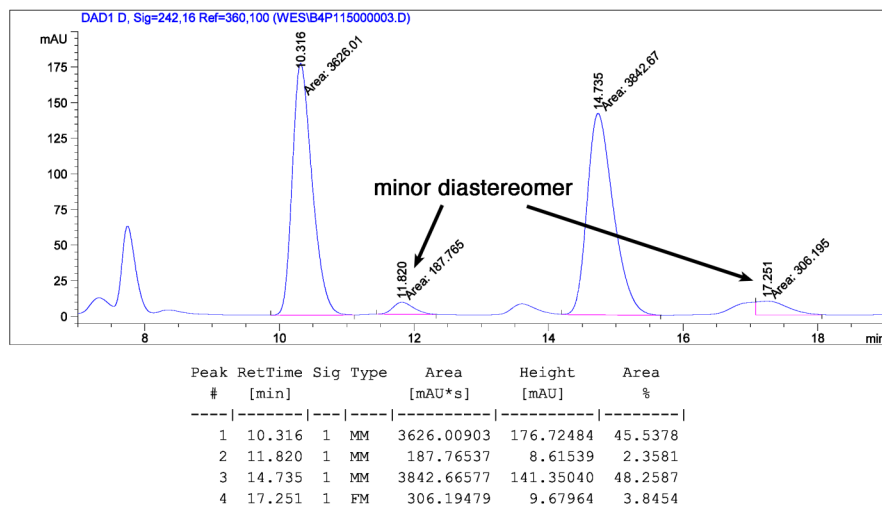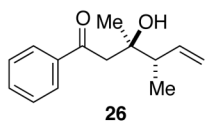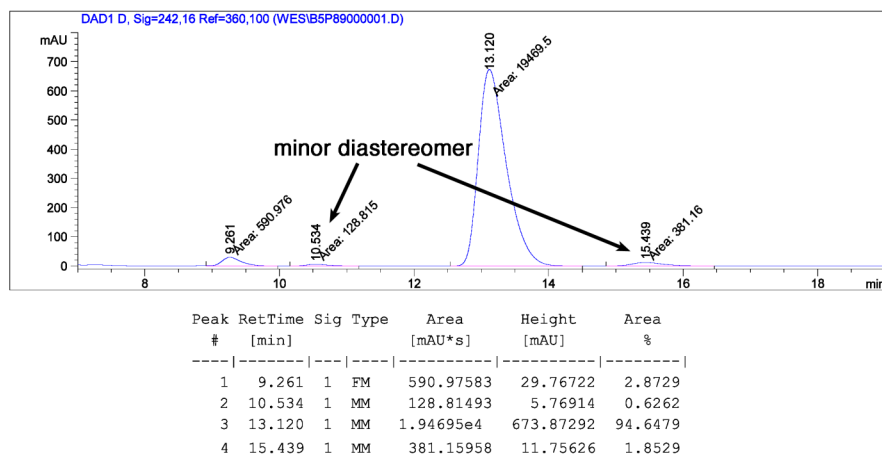

**Supplementary Figure 33** | HPLC trace of **26** (Chiralcel OD, Hexanes:*i*-PrOH = 98:2, 1 mL/min, 242 nm).

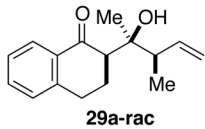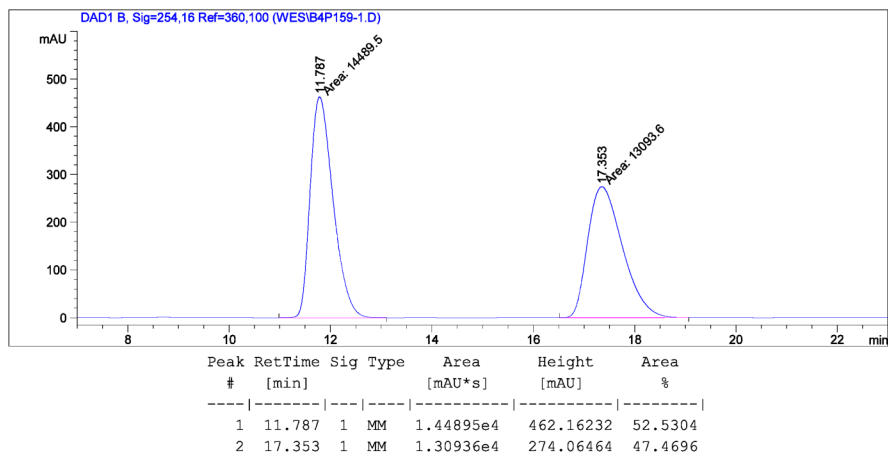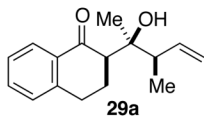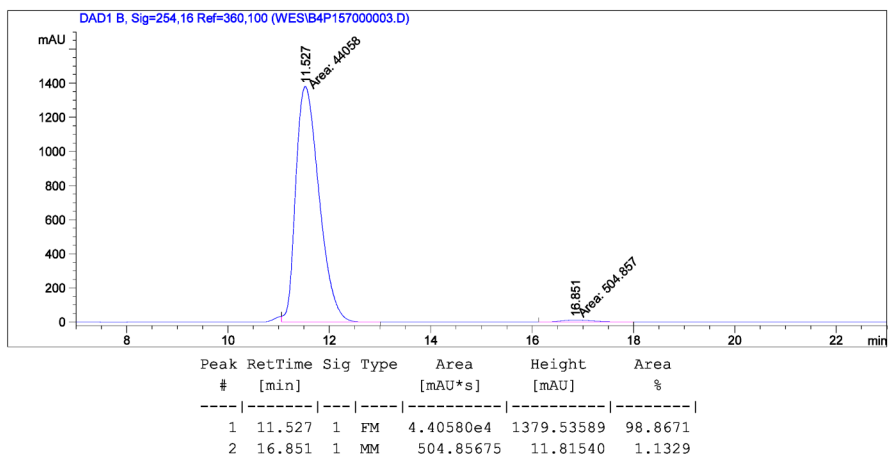

**Supplementary Figure 34** | HPLC trace of **29a** (Chiralcel OD, Hexanes:*i*-PrOH = 98:2, 1 mL/min, 254 nm).

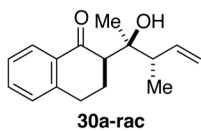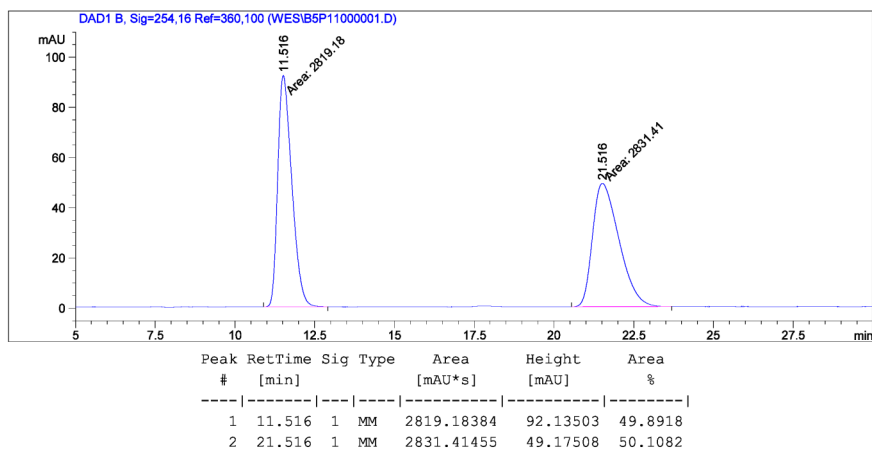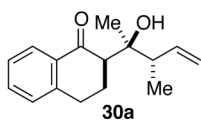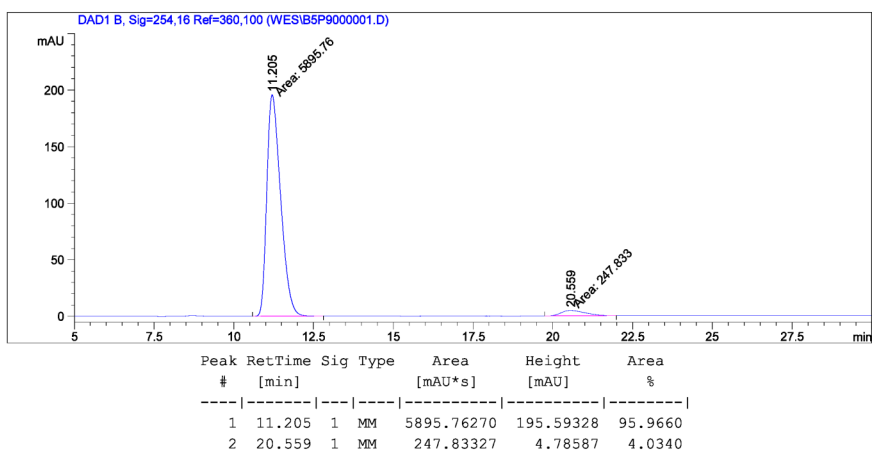

**Supplementary Figure 35** | HPLC trace of **30a** (Chiralcel OD, Hexanes:*i*-PrOH = 98:2, 1 mL/min, 254 nm).



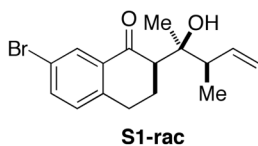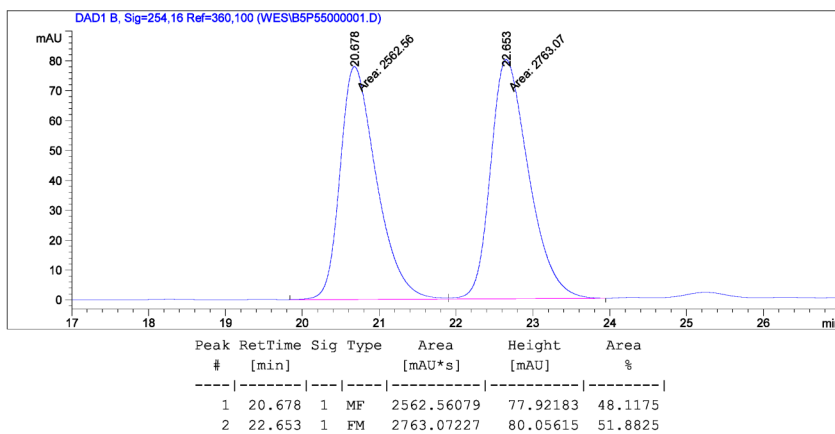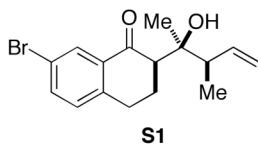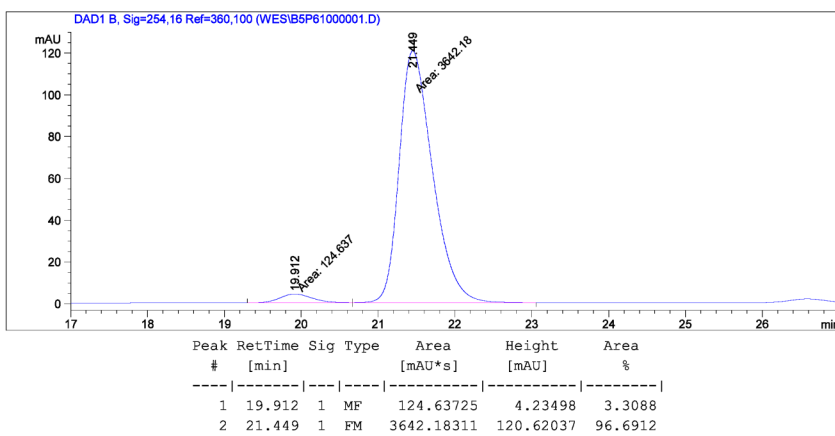

**Supplementary Figure 36** | HPLC trace of **S1** (Chiralpak AD-H, Hexanes:*i*-PrOH = 98:2, 1 mL/min, 254 nm).

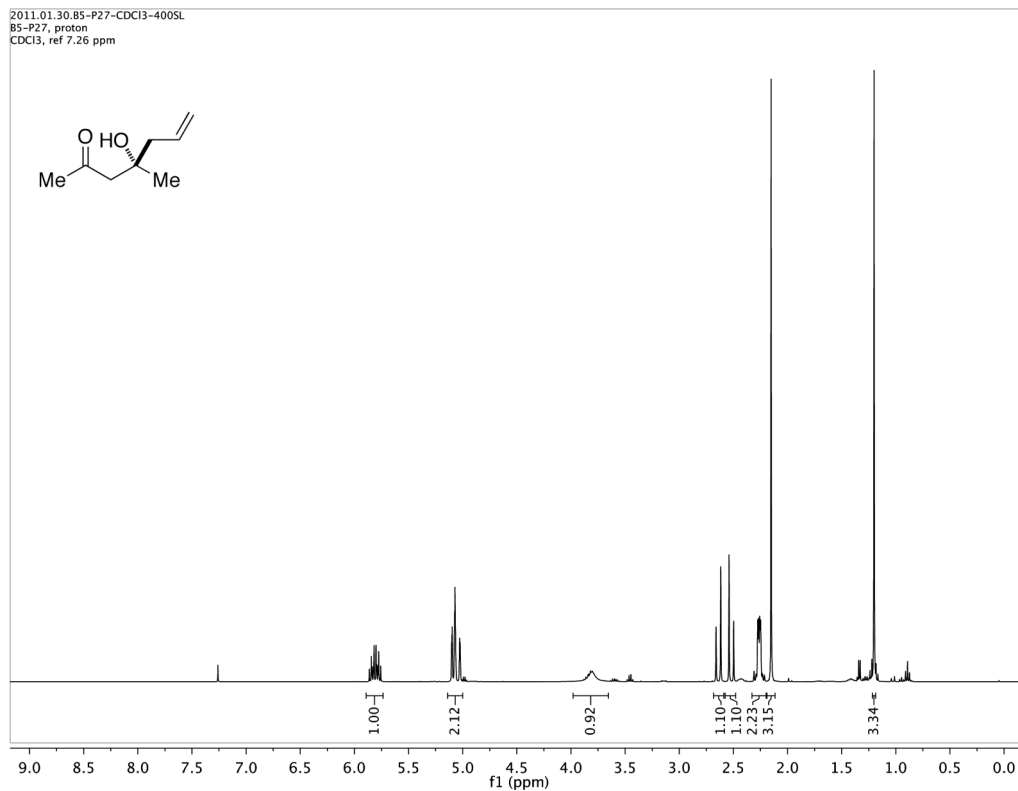

Supplementary Figure 37 |  $^1\text{H}$  NMR spectrum of compound 1.

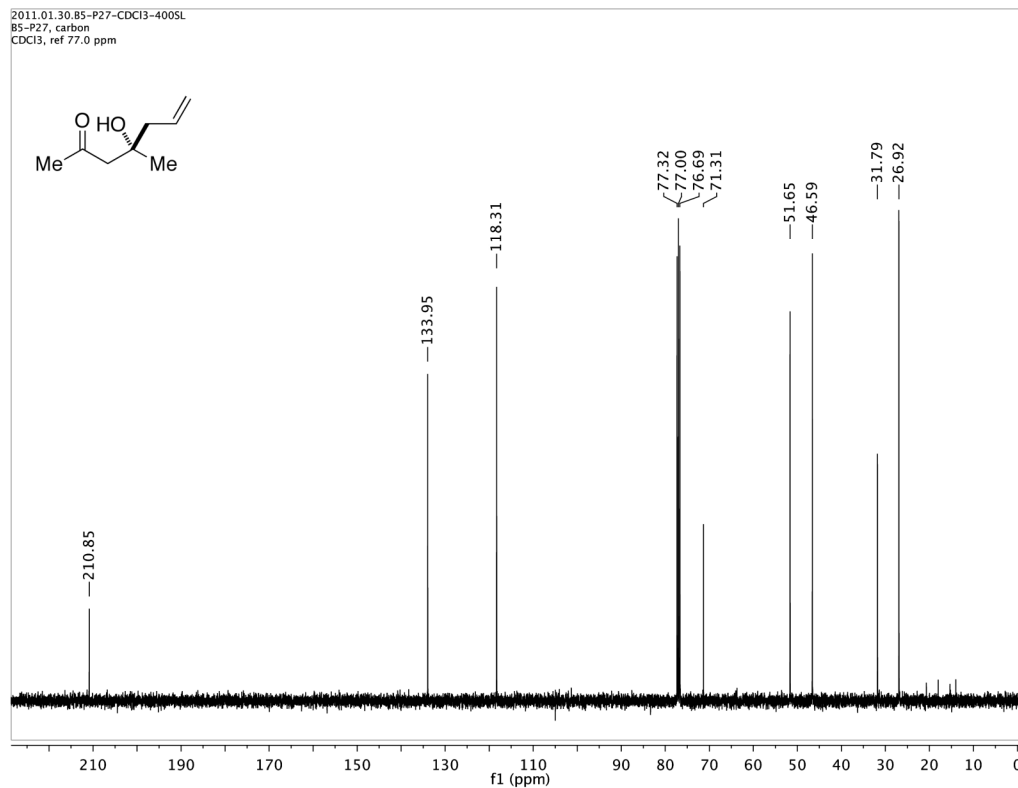

Supplementary Figure 38 |  $^{13}\text{C}$  NMR spectrum of compound 1.

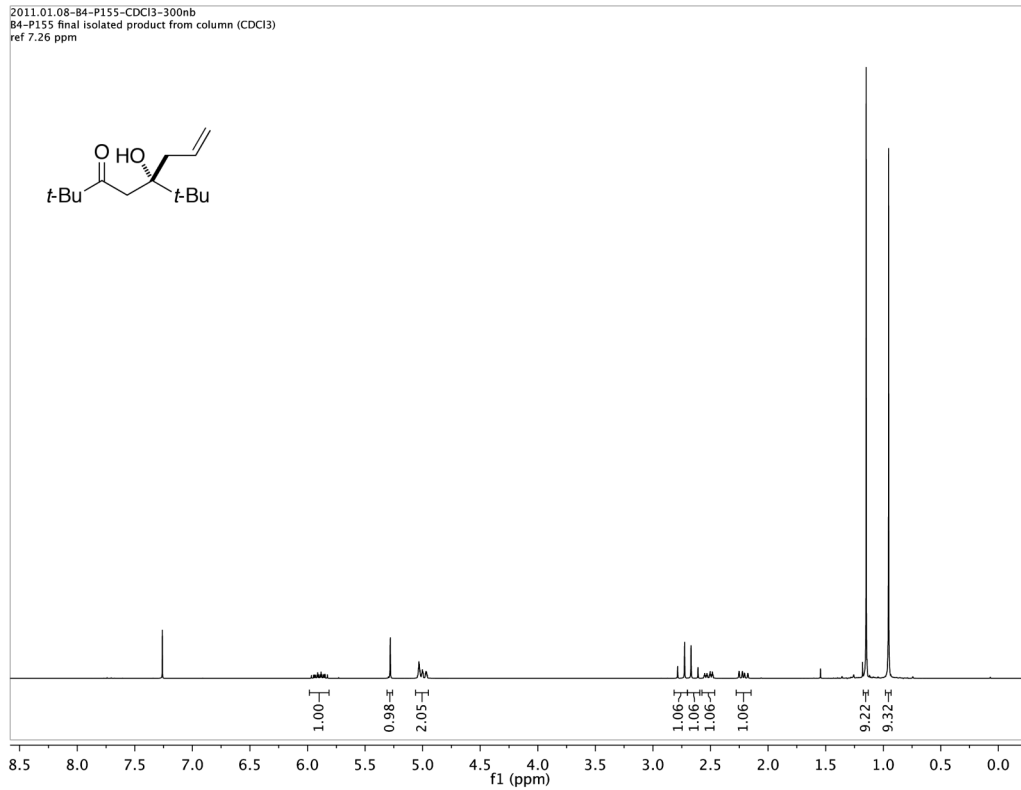

Supplementary Figure 39 |  $^1\text{H}$  NMR spectrum of compound 7.

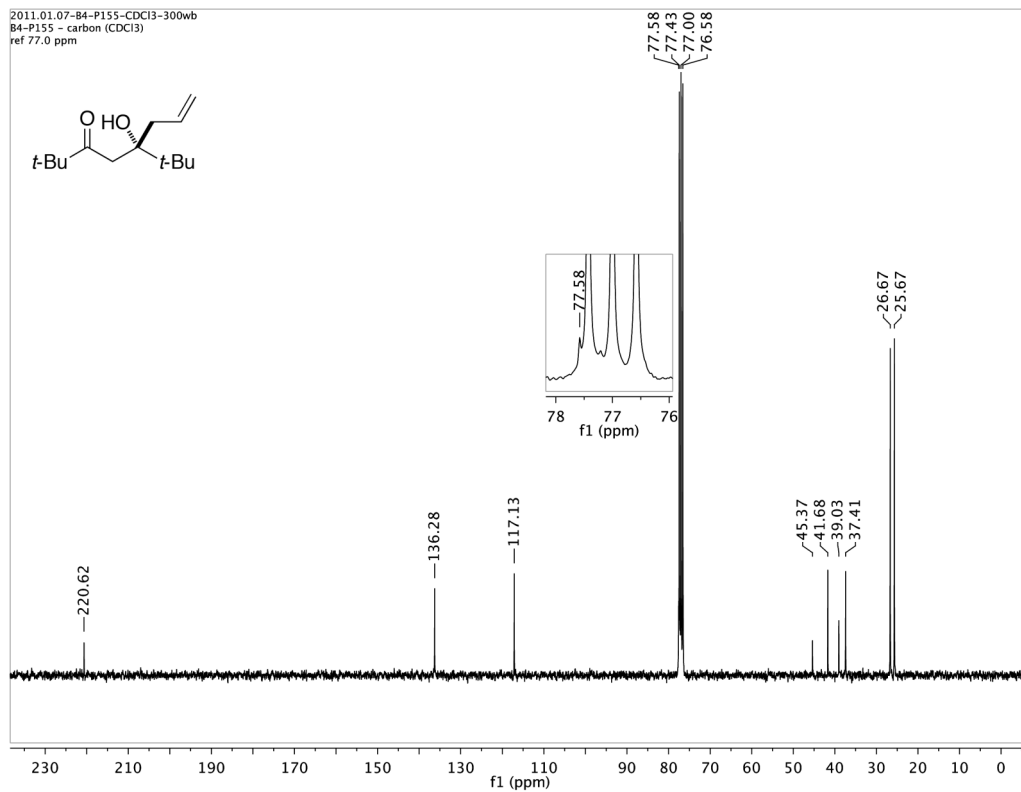

Supplementary Figure 40 |  $^{13}\text{C}$  NMR spectrum of compound 7.

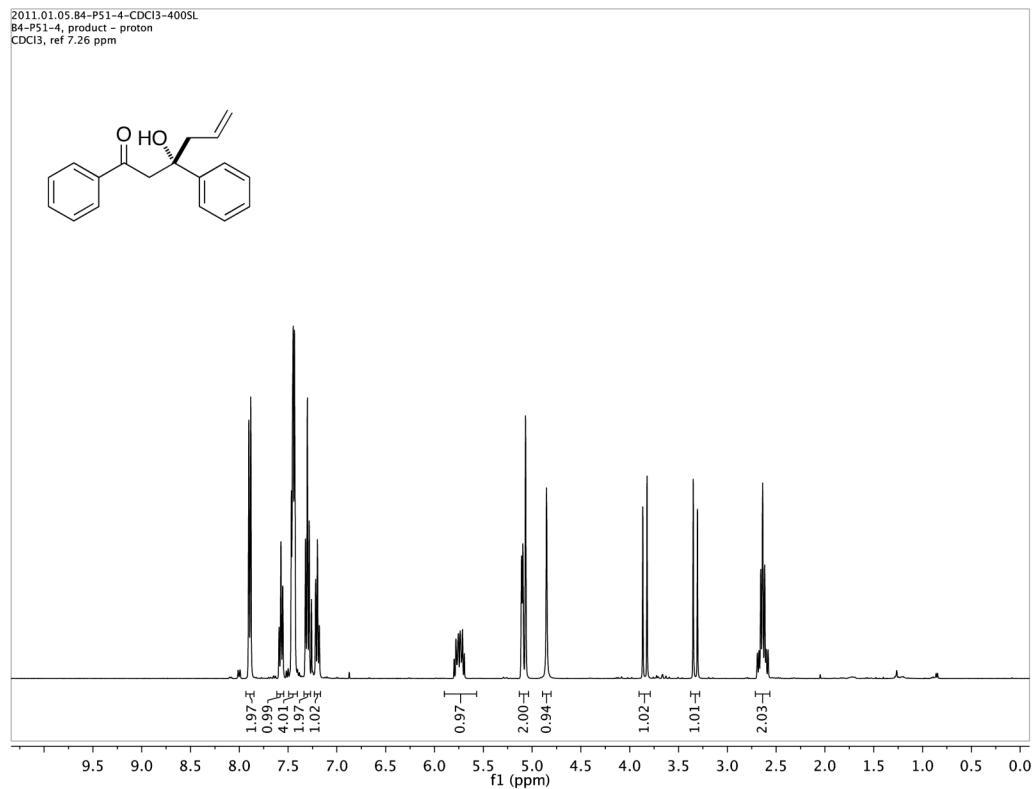

Supplementary Figure 41 |  $^1\text{H}$  NMR spectrum of compound 8.

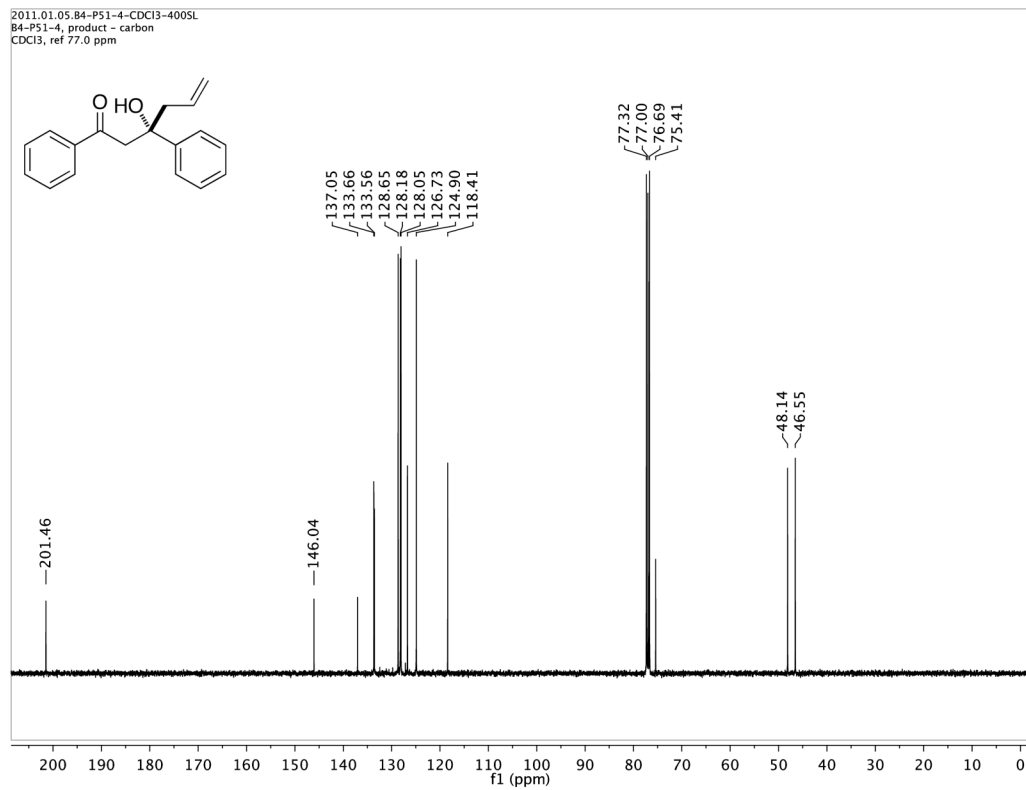

Supplementary Figure 42 |  $^{13}\text{C}$  NMR spectrum of compound 8.

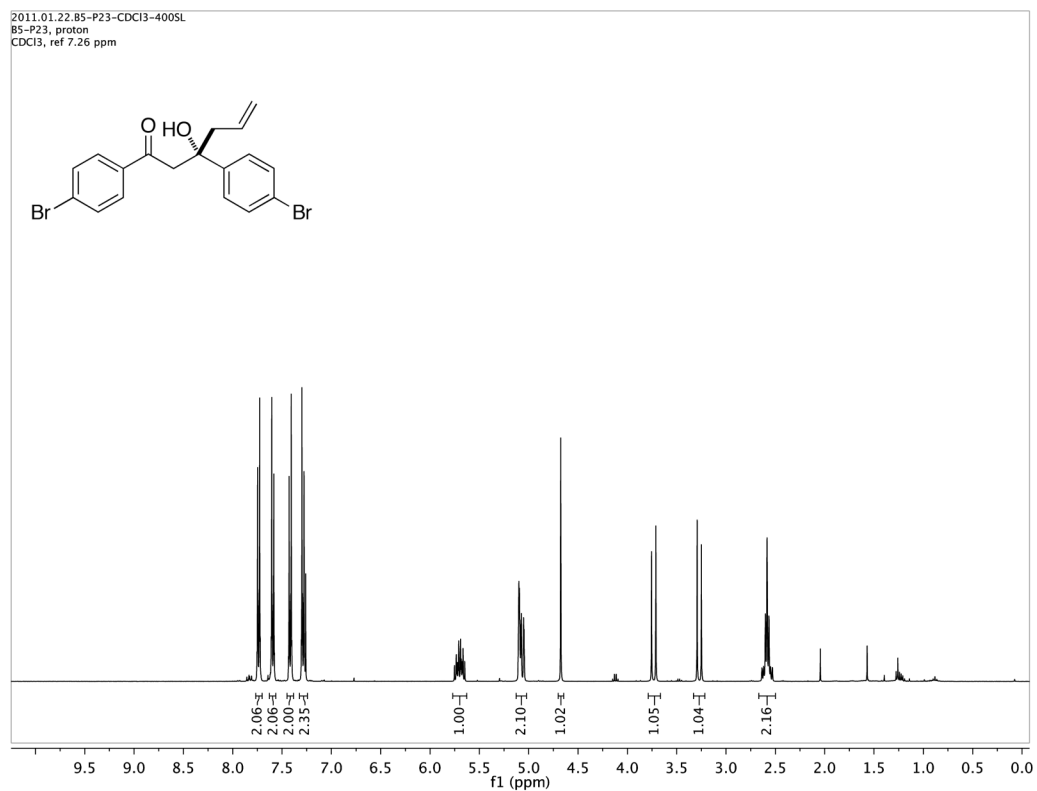

Supplementary Figure 43 |  $^1\text{H}$  NMR spectrum of compound **9**.

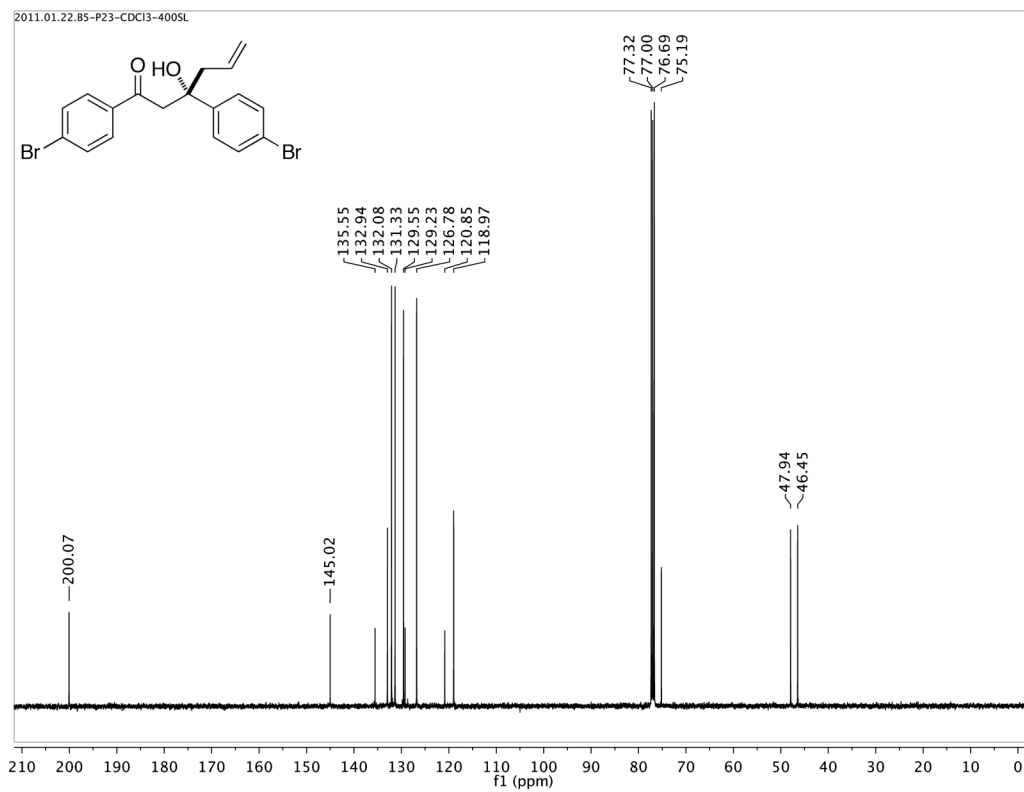

Supplementary Figure 44 |  $^{13}\text{C}$  NMR spectrum of compound **9**.

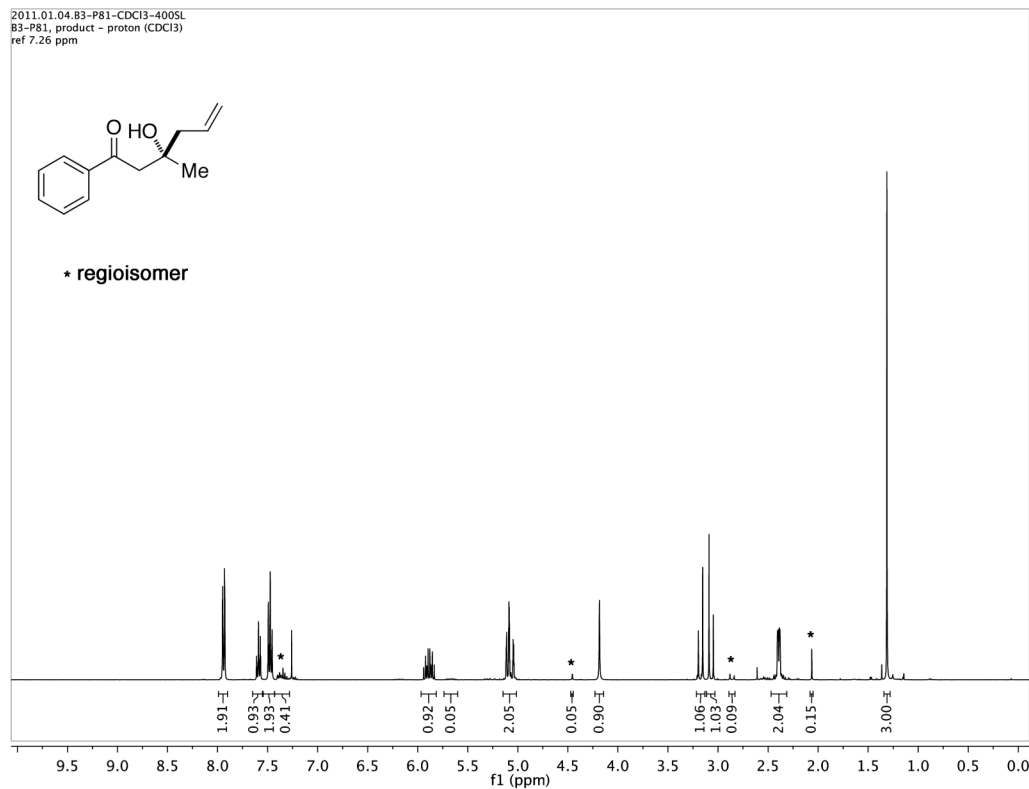

Supplementary Figure 45 |  $^1\text{H}$  NMR spectrum of compound 10.

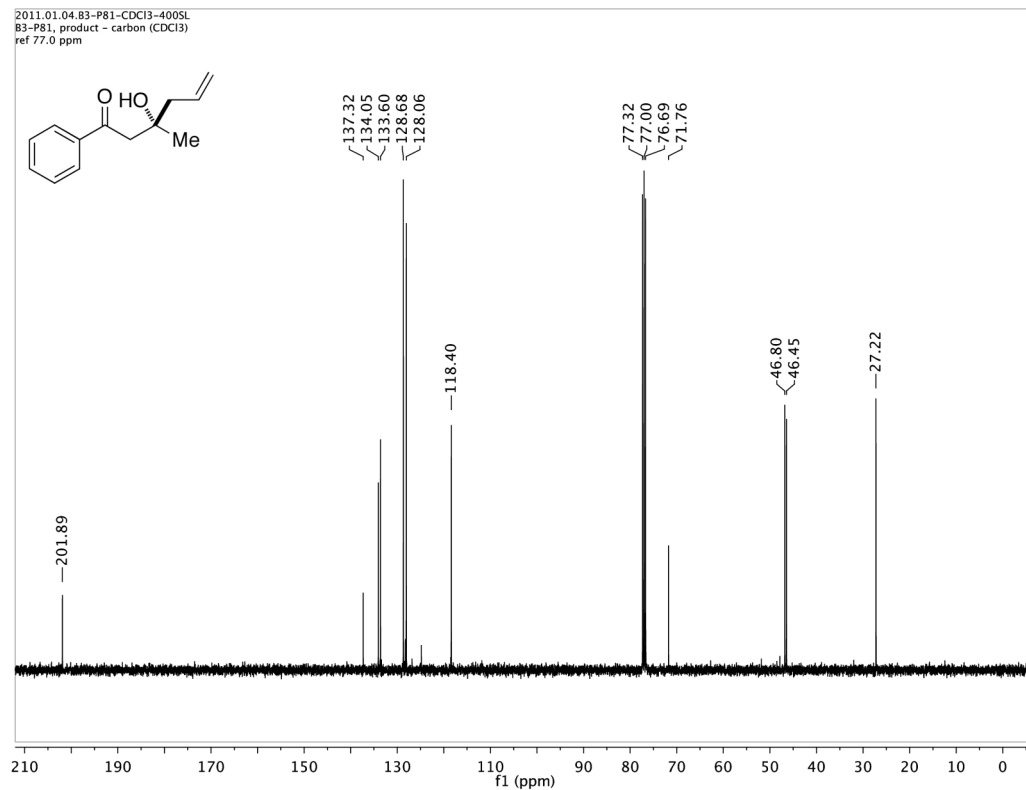

Supplementary Figure 46 |  $^{13}\text{C}$  NMR spectrum of compound 10.

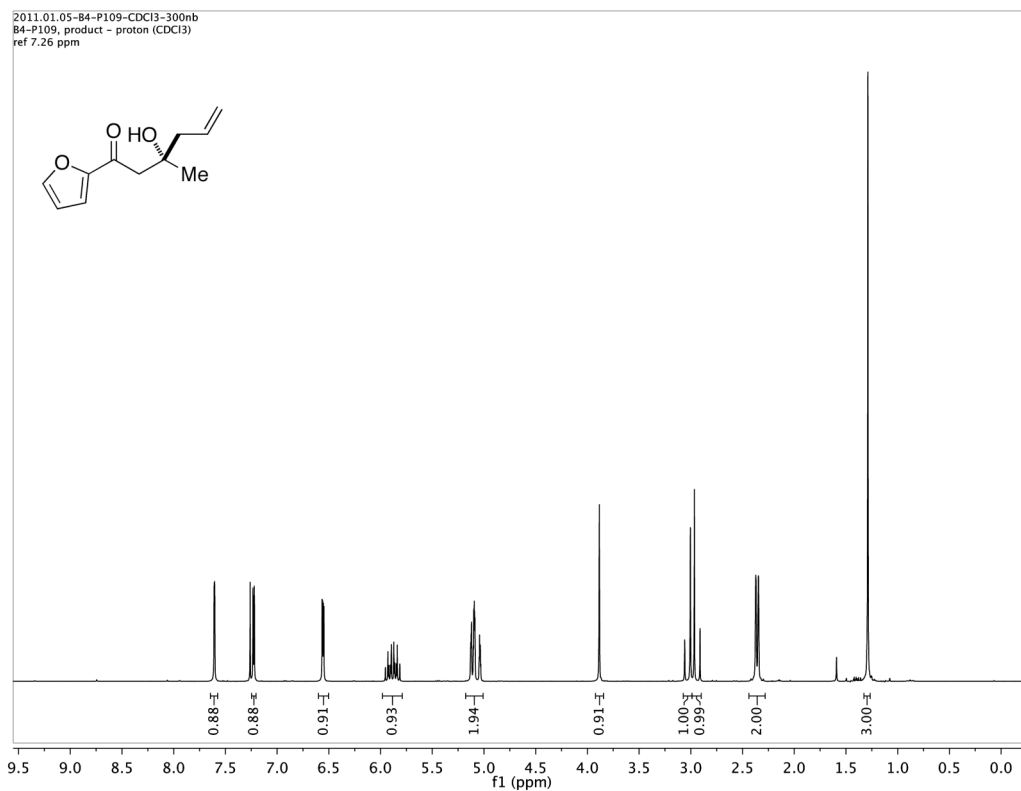

Supplementary Figure 47 |  $^1\text{H}$  NMR spectrum of compound 11.

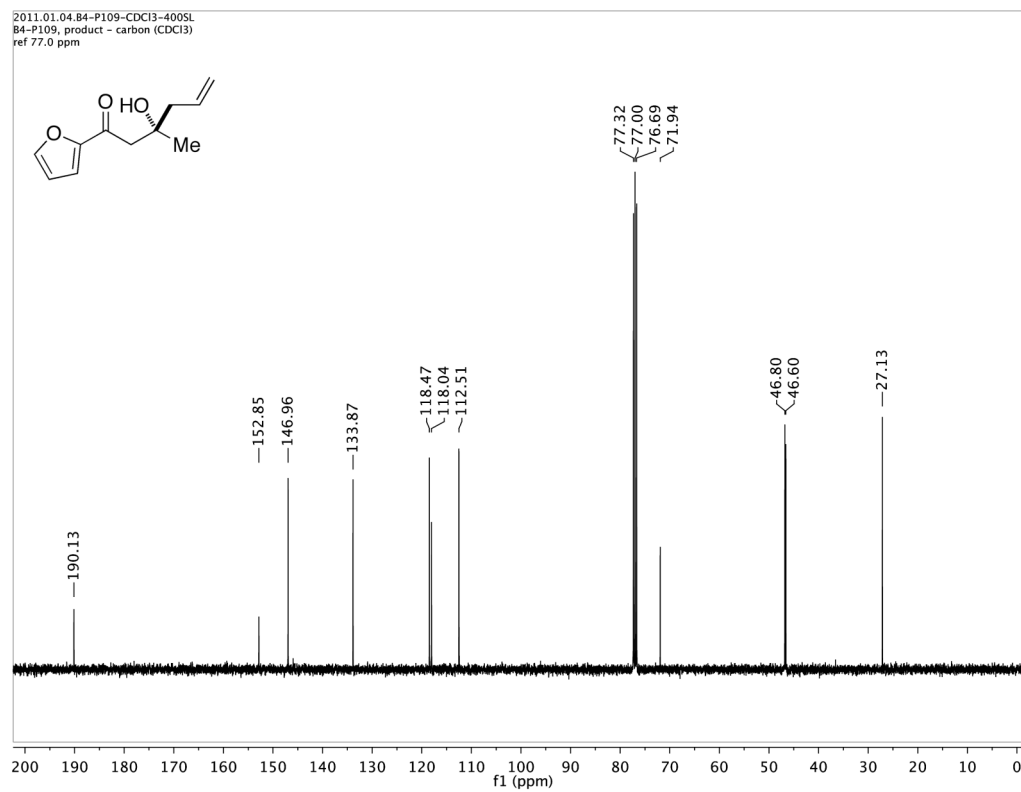

Supplementary Figure 48 |  $^{13}\text{C}$  NMR spectrum of compound 11.

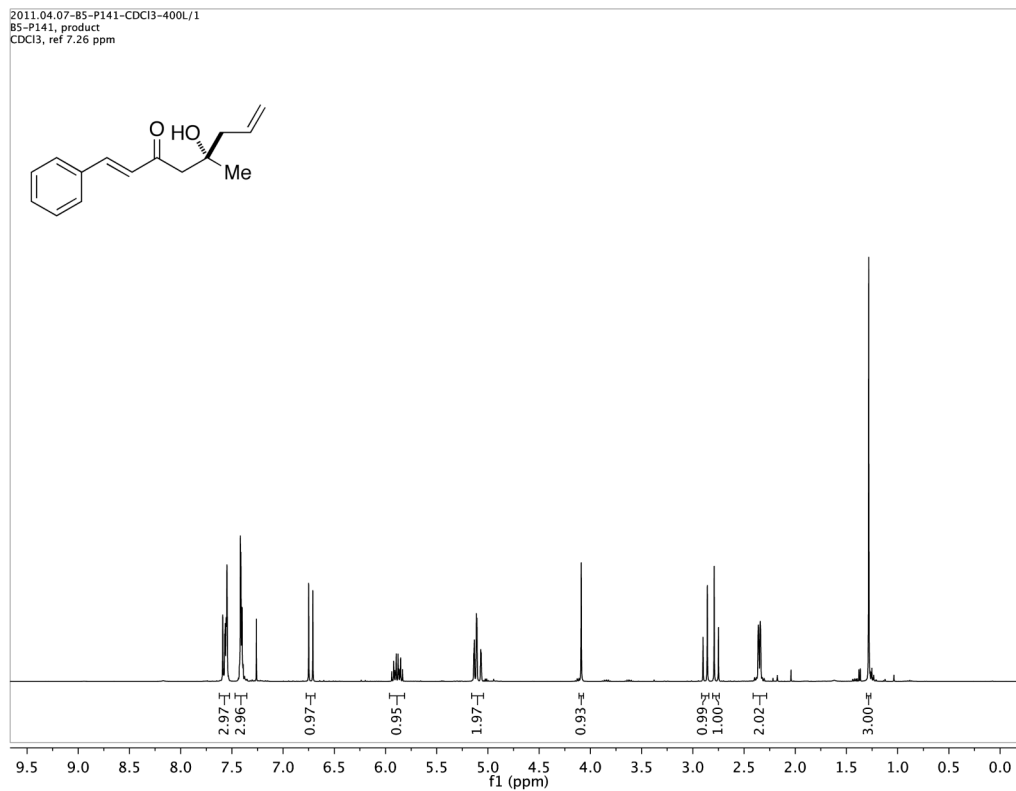

Supplementary Figure 49 |  $^1\text{H}$  NMR spectrum of compound 12.

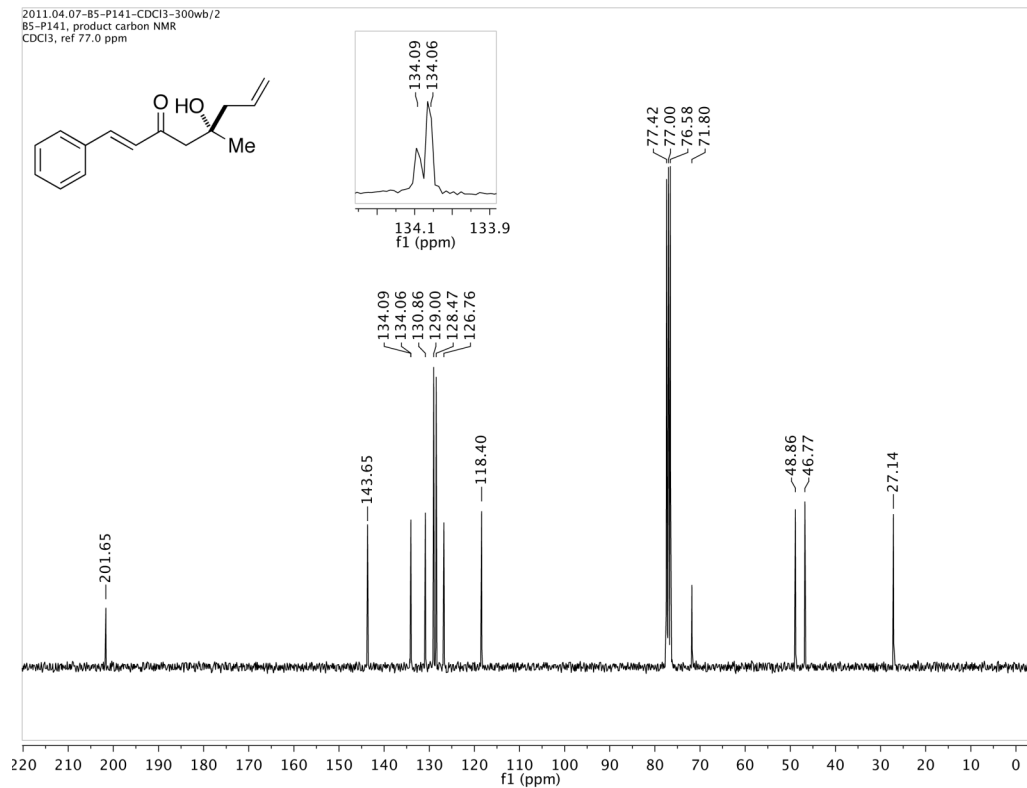

Supplementary Figure 50 |  $^{13}\text{C}$  NMR spectrum of compound 12.



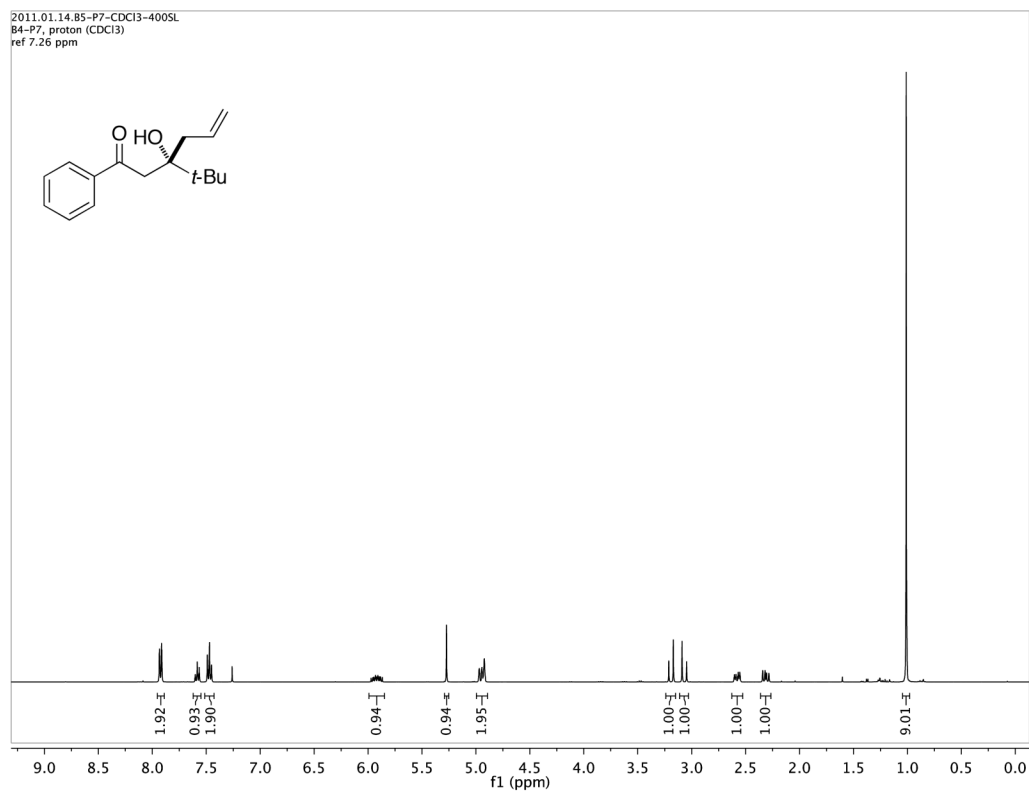

Supplementary Figure 51 |  $^1\text{H}$  NMR spectrum of compound 13.

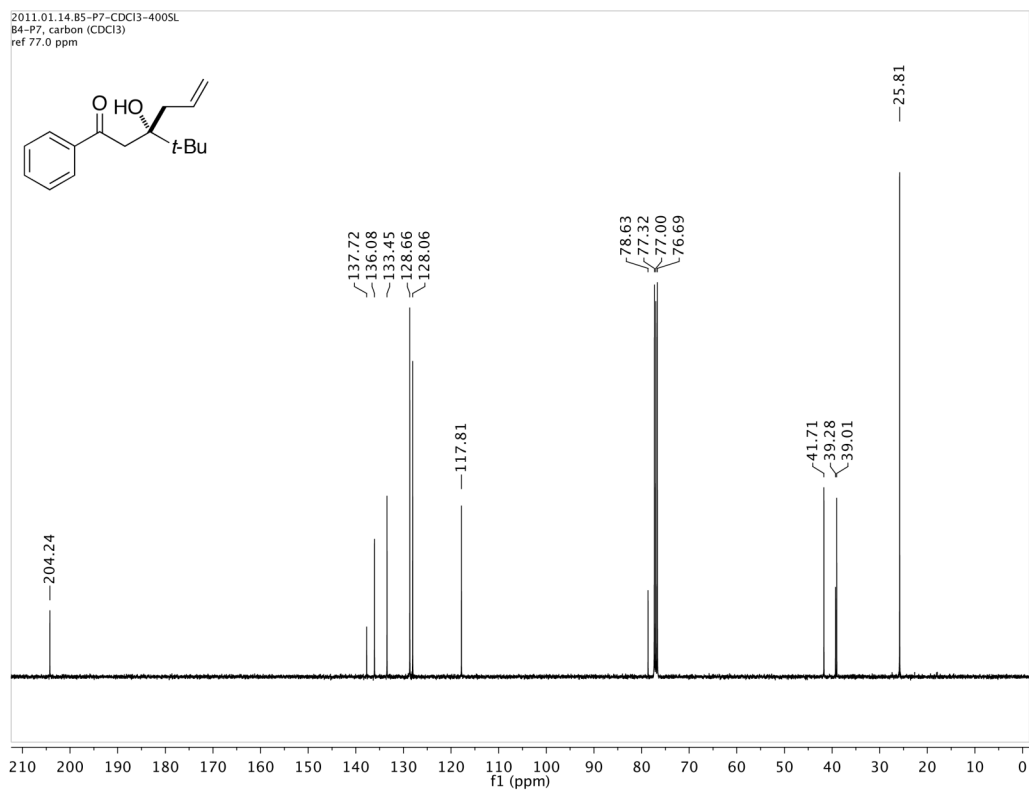

Supplementary Figure 52 |  $^{13}\text{C}$  NMR spectrum of compound 13.

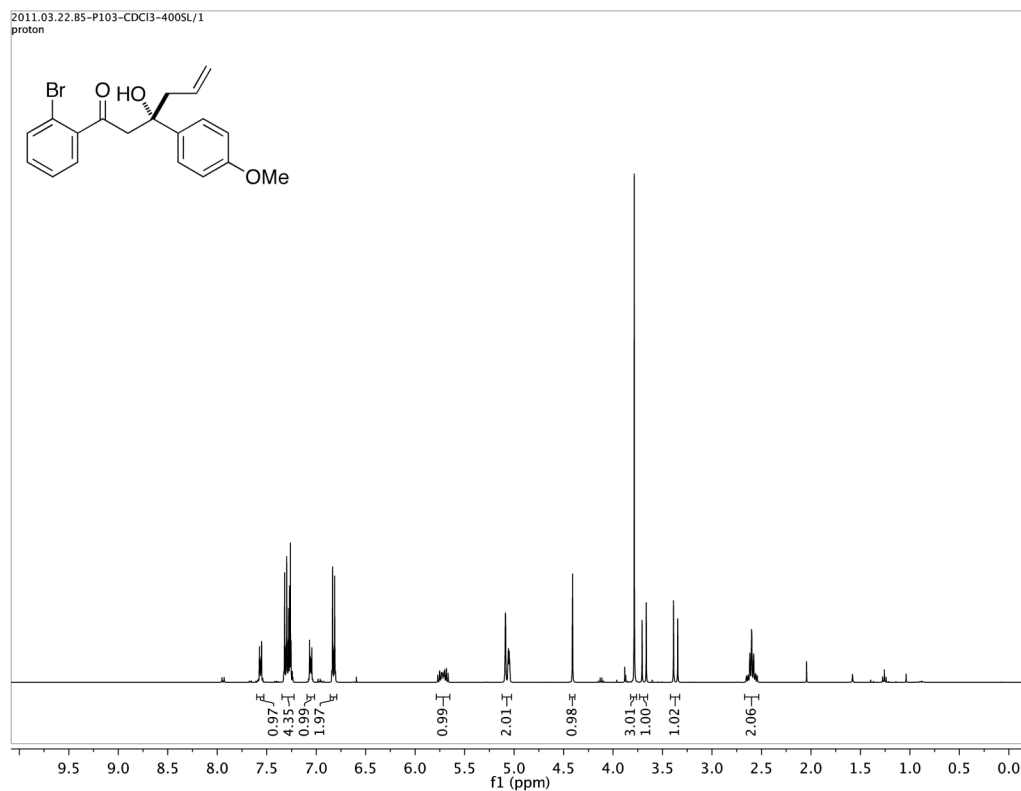

Supplementary Figure 53 |  $^1\text{H}$  NMR spectrum of compound 14.

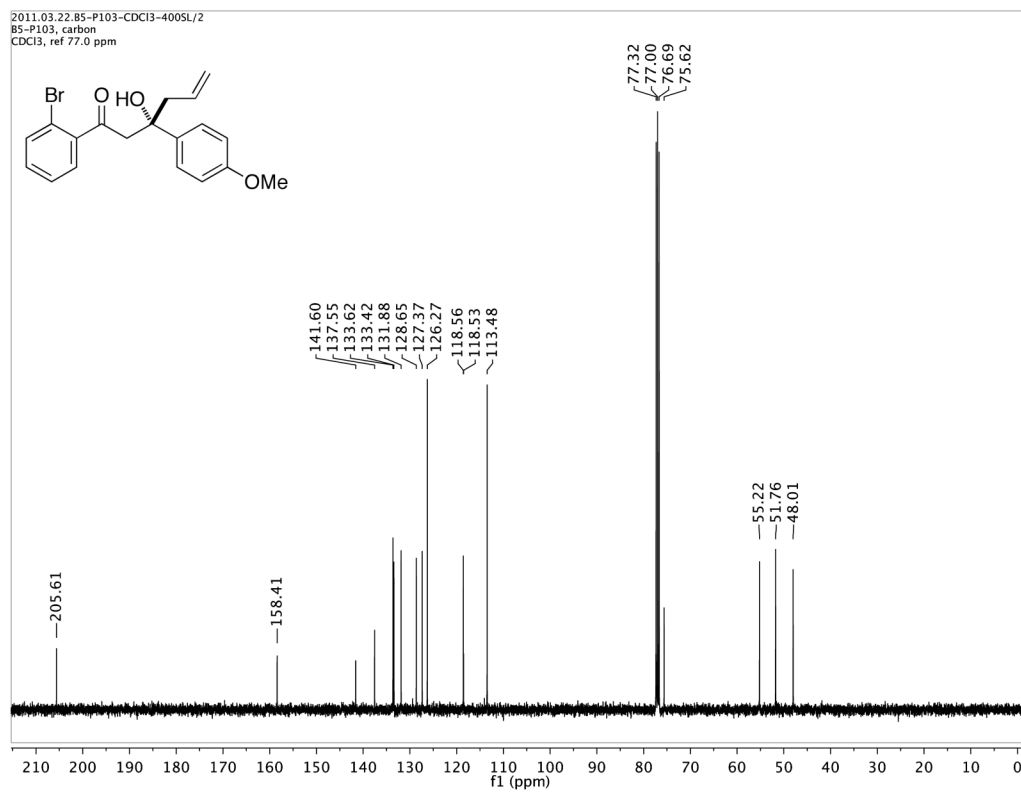

Supplementary Figure 54 |  $^{13}\text{C}$  NMR spectrum of compound 14.

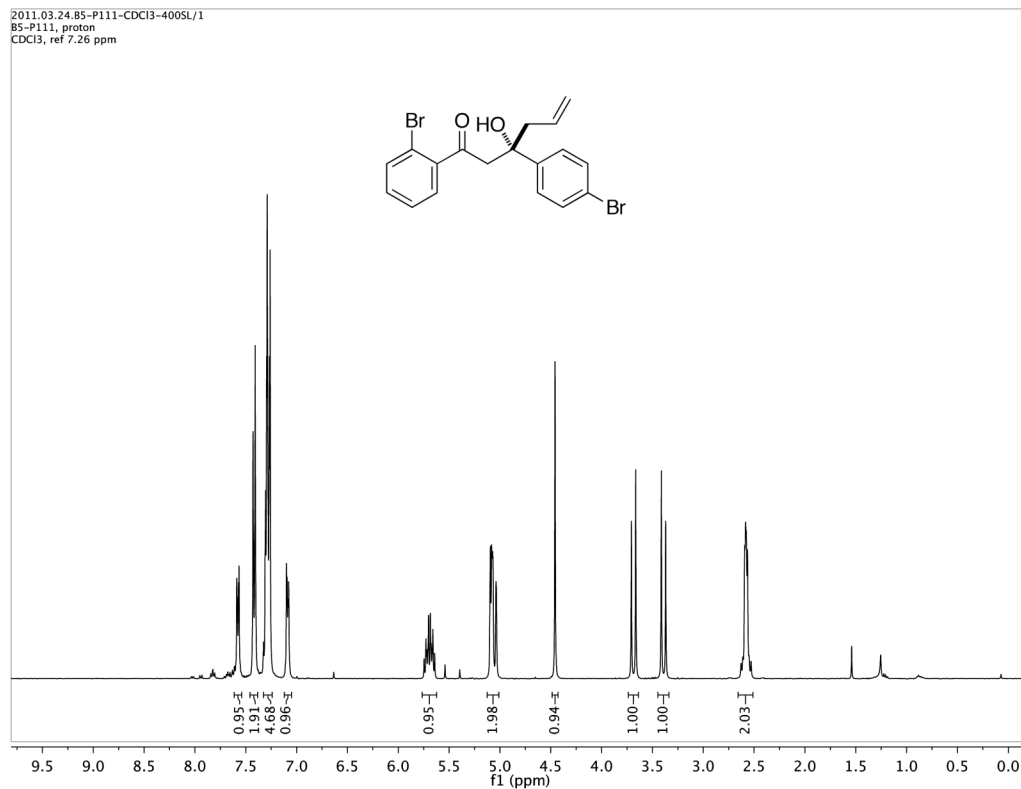

Supplementary Figure 55 |  $^1\text{H}$  NMR spectrum of compound 15.

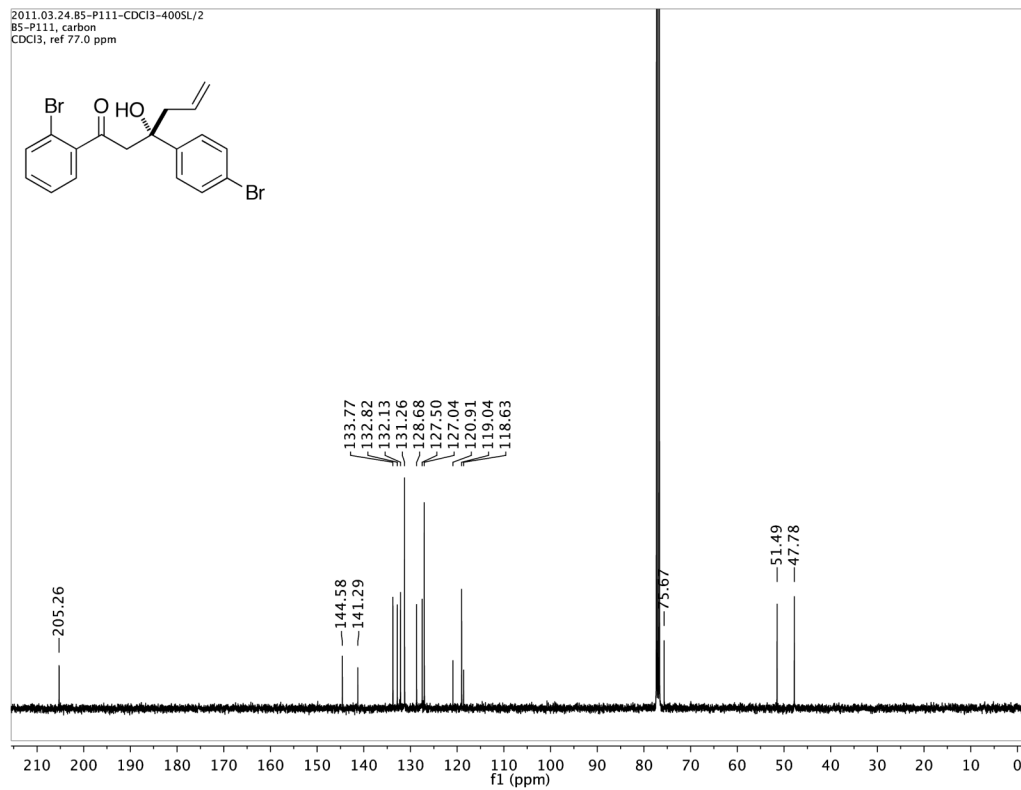

Supplementary Figure 56 |  $^{13}\text{C}$  NMR spectrum of compound 15.

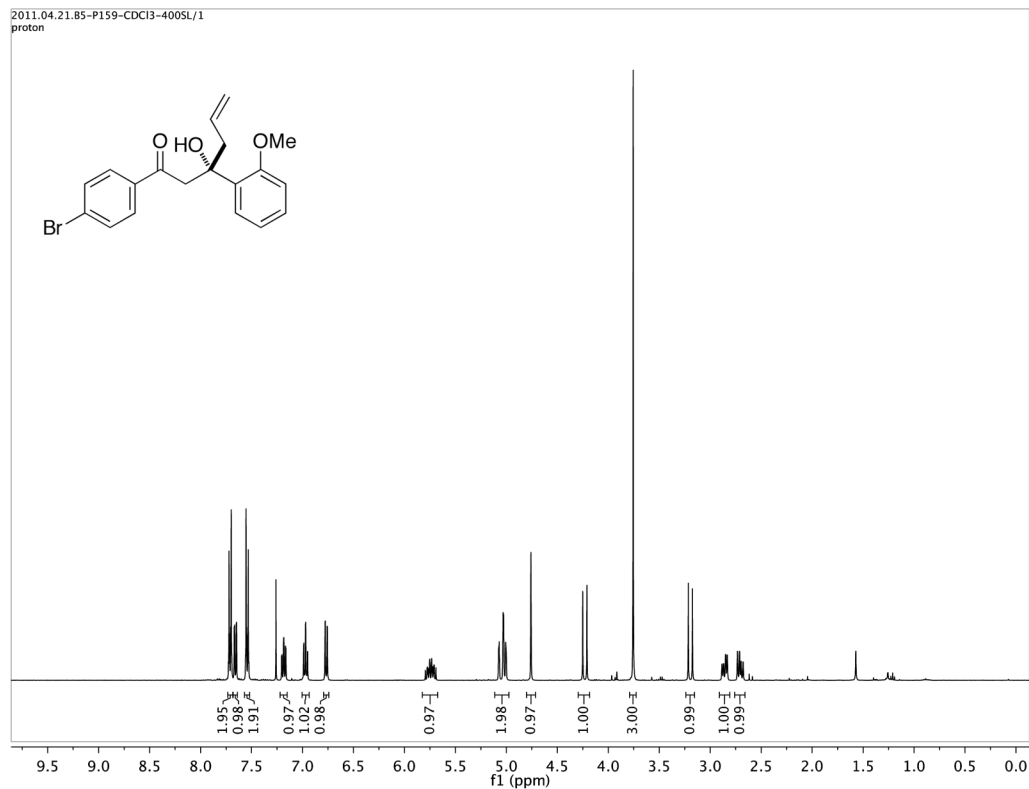

Supplementary Figure 57 |  $^1\text{H}$  NMR spectrum of compound 16a.

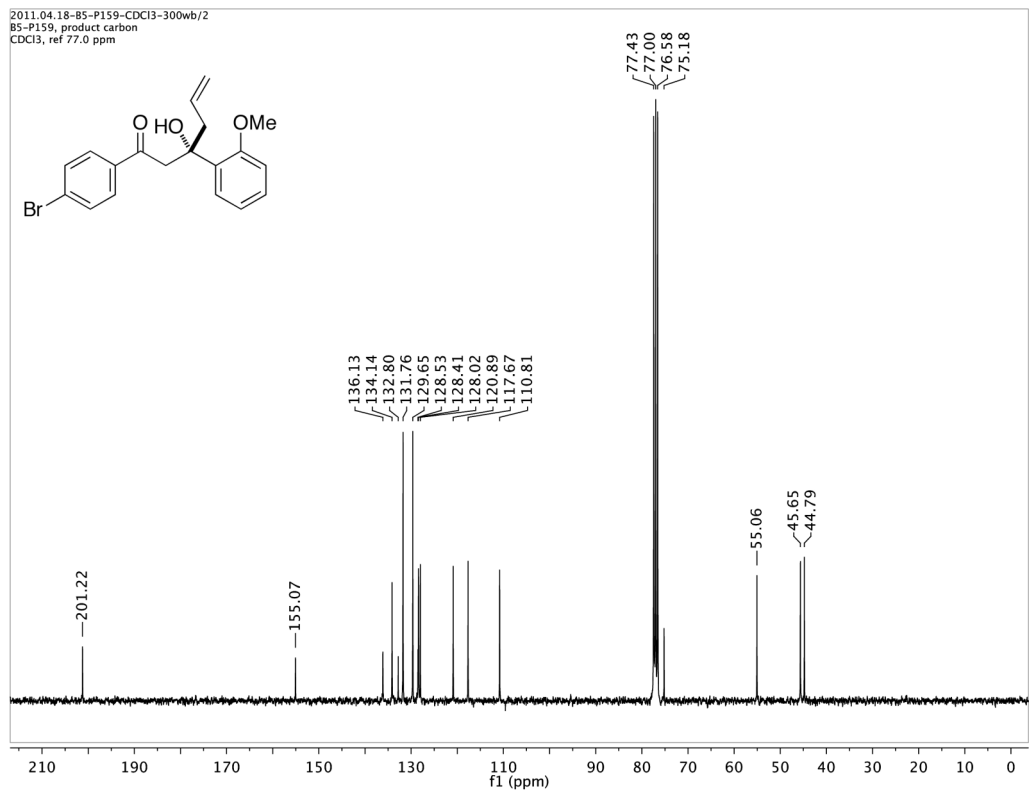

Supplementary Figure 58 |  $^{13}\text{C}$  NMR spectrum of compound 16a.

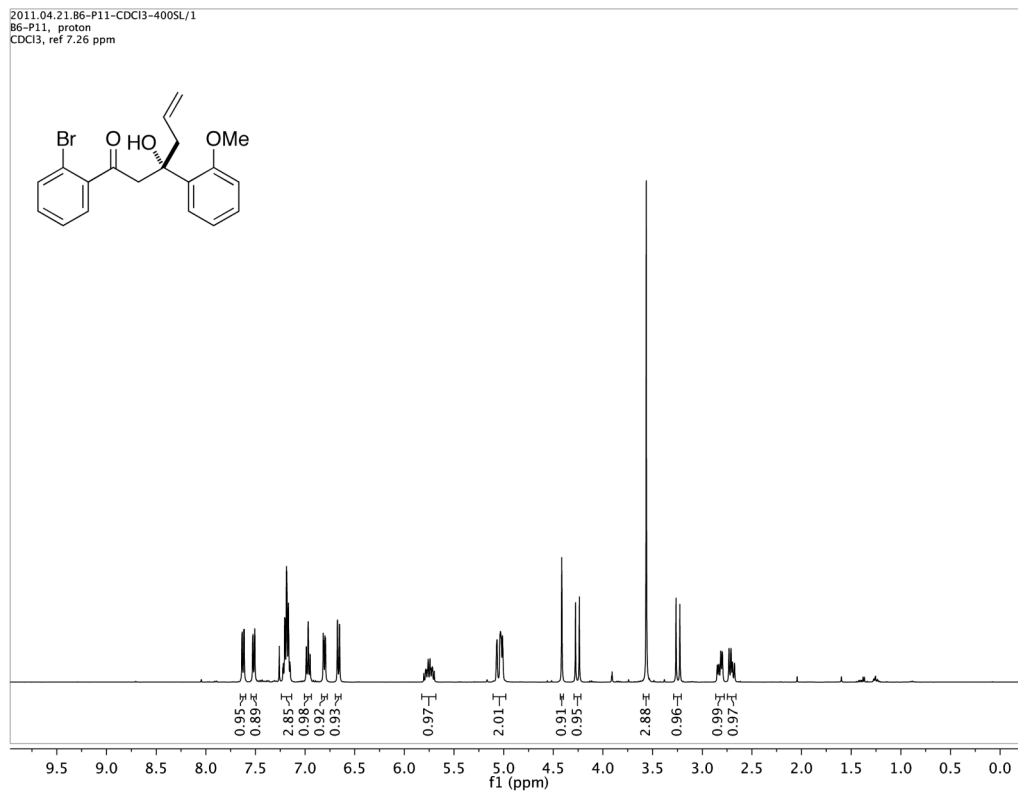

Supplementary Figure 59 |  $^1\text{H}$  NMR spectrum of compound 17.

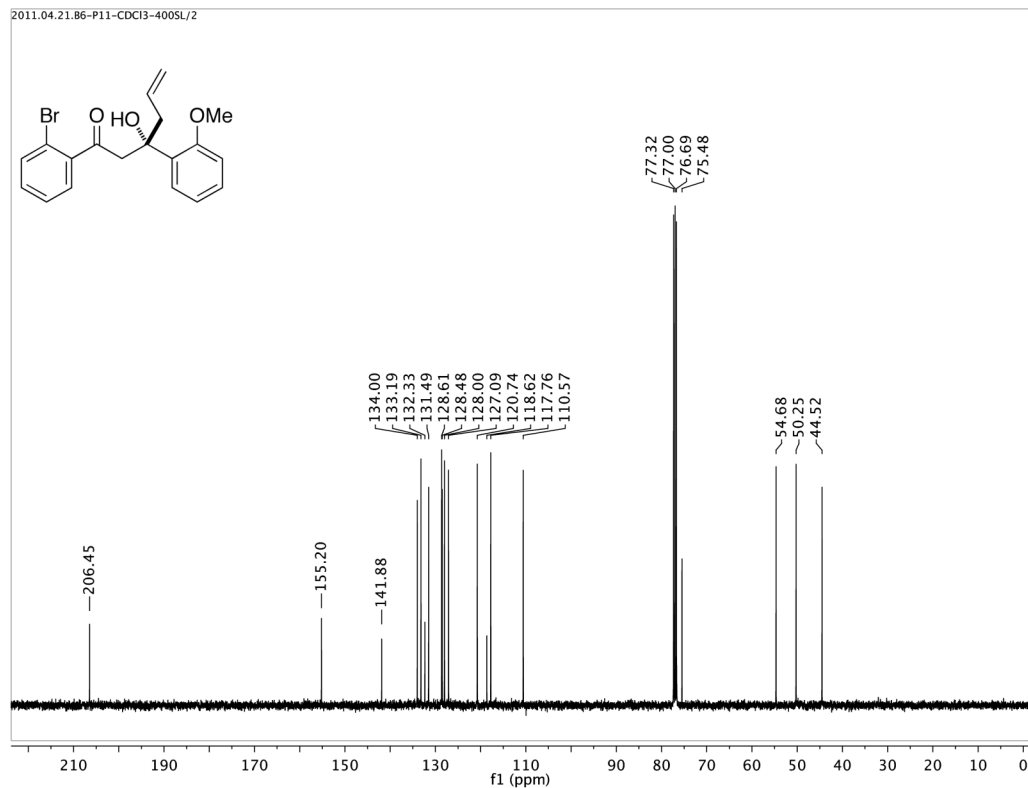

Supplementary Figure 60 |  $^{13}\text{C}$  NMR spectrum of compound 17.

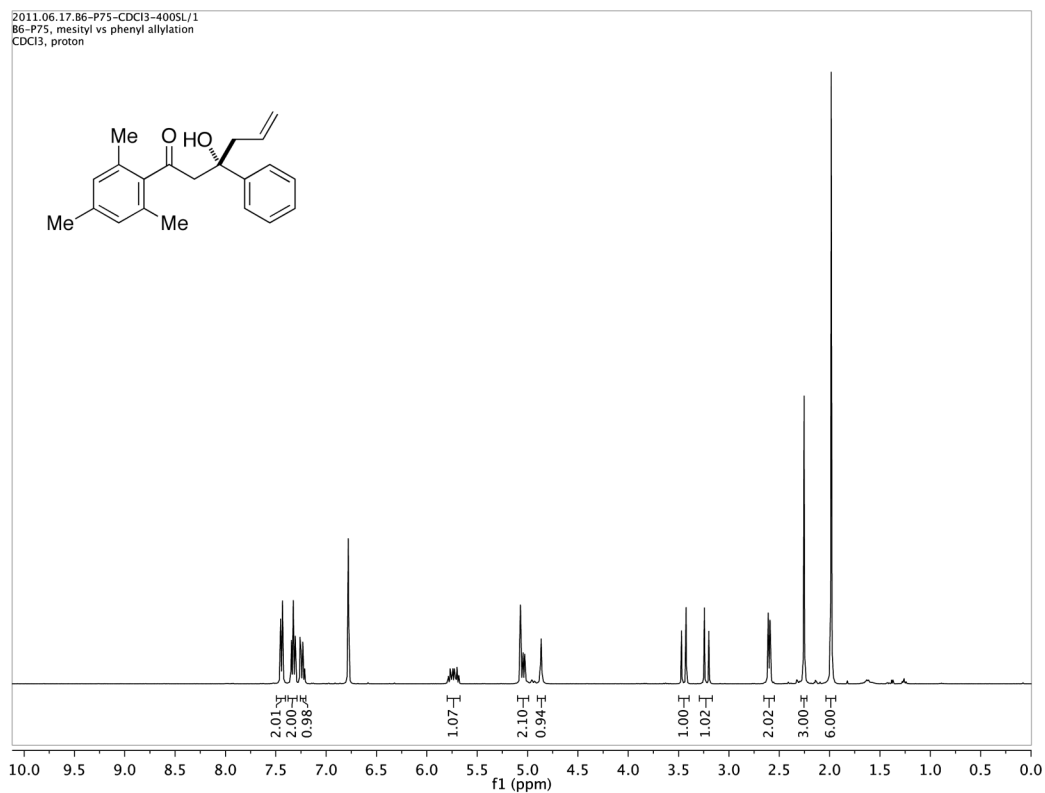

Supplementary Figure 61 |  $^1\text{H}$  NMR spectrum of compound 18.

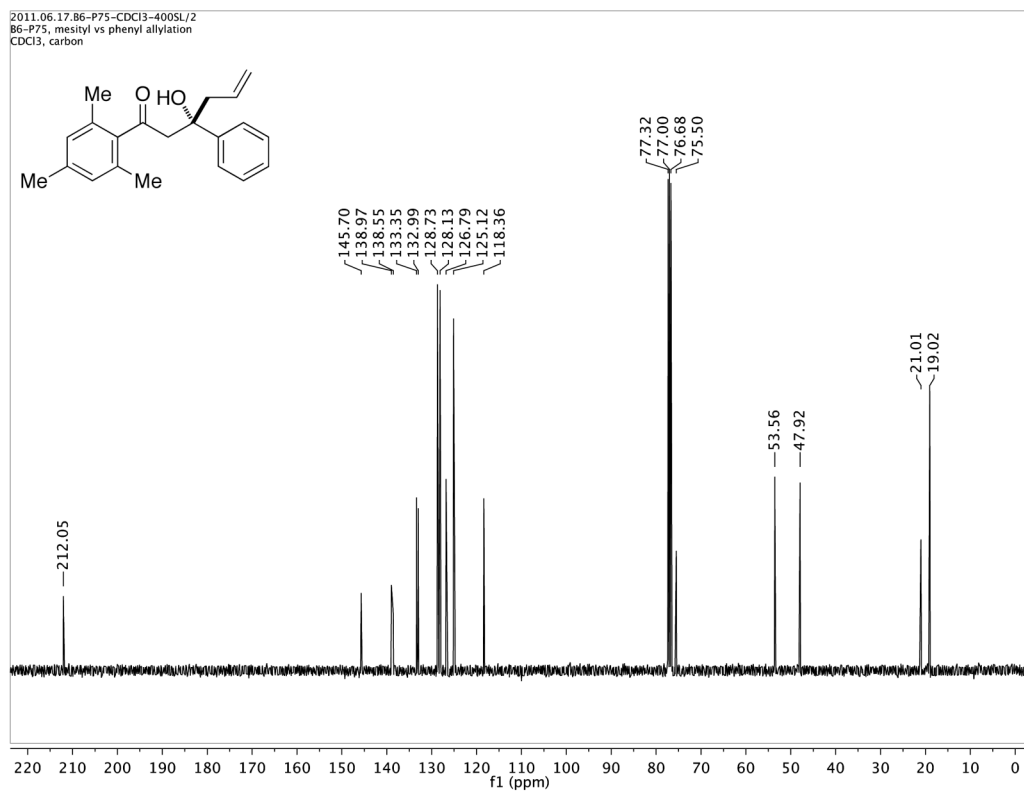

Supplementary Figure 62 |  $^{13}\text{C}$  NMR spectrum of compound 18.

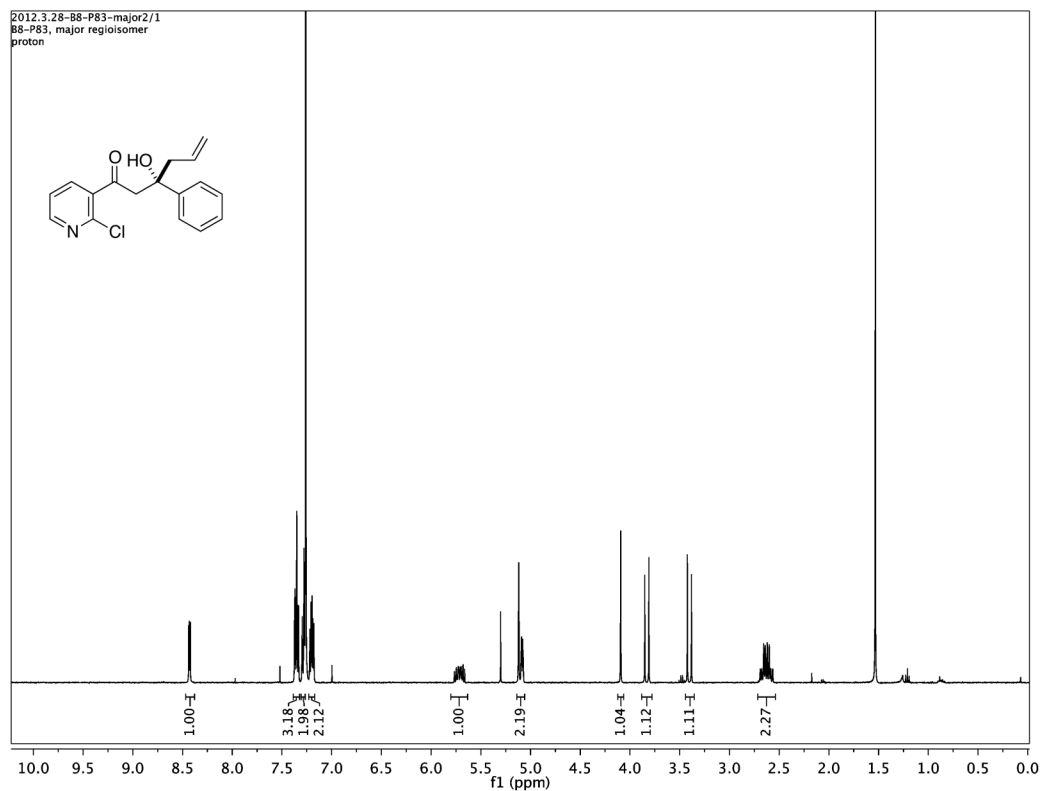

Supplementary Figure 63 |  $^1\text{H}$  NMR spectrum of compound 19.

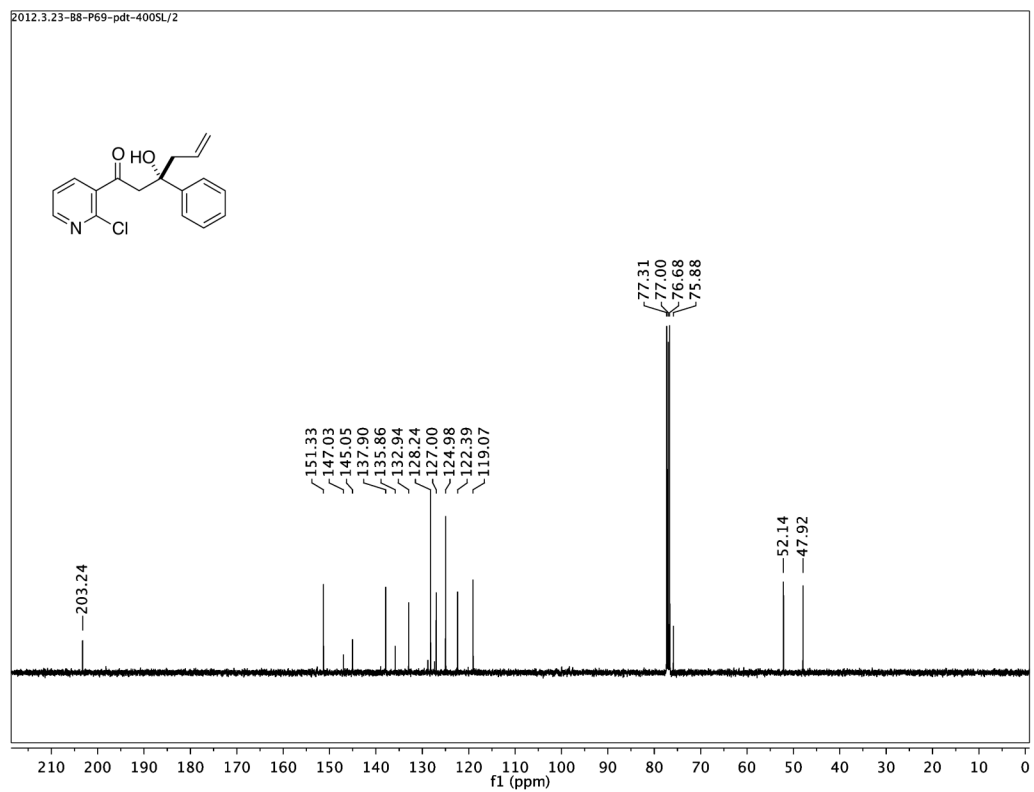

Supplementary Figure 64 |  $^{13}\text{C}$  NMR spectrum of compound 19.

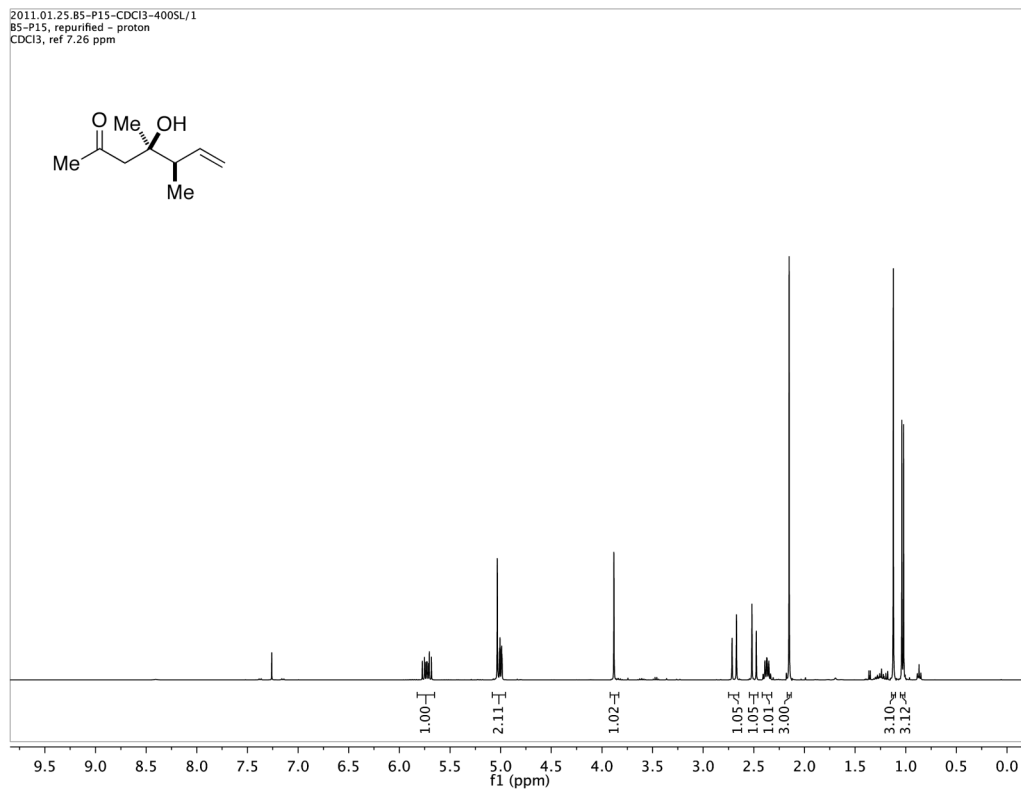

**Supplementary Figure 65** |  $^1\text{H}$  NMR spectrum of compound 22.

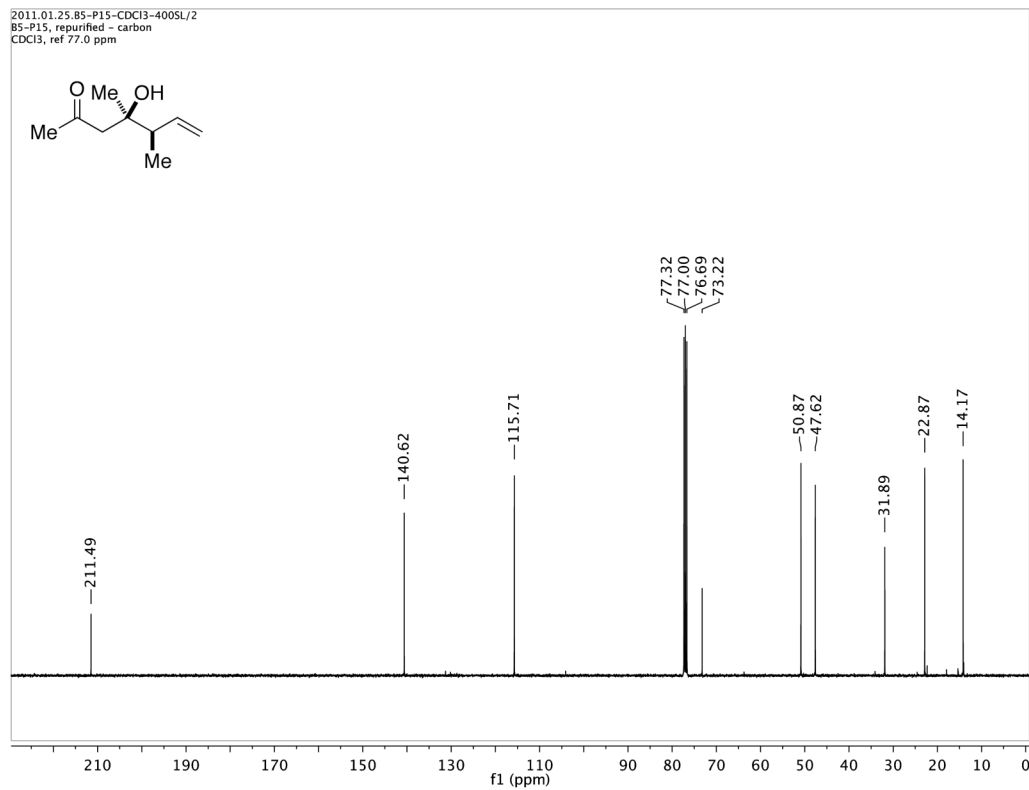

**Supplementary Figure 66** |  $^{13}\text{C}$  NMR spectrum of compound 22.



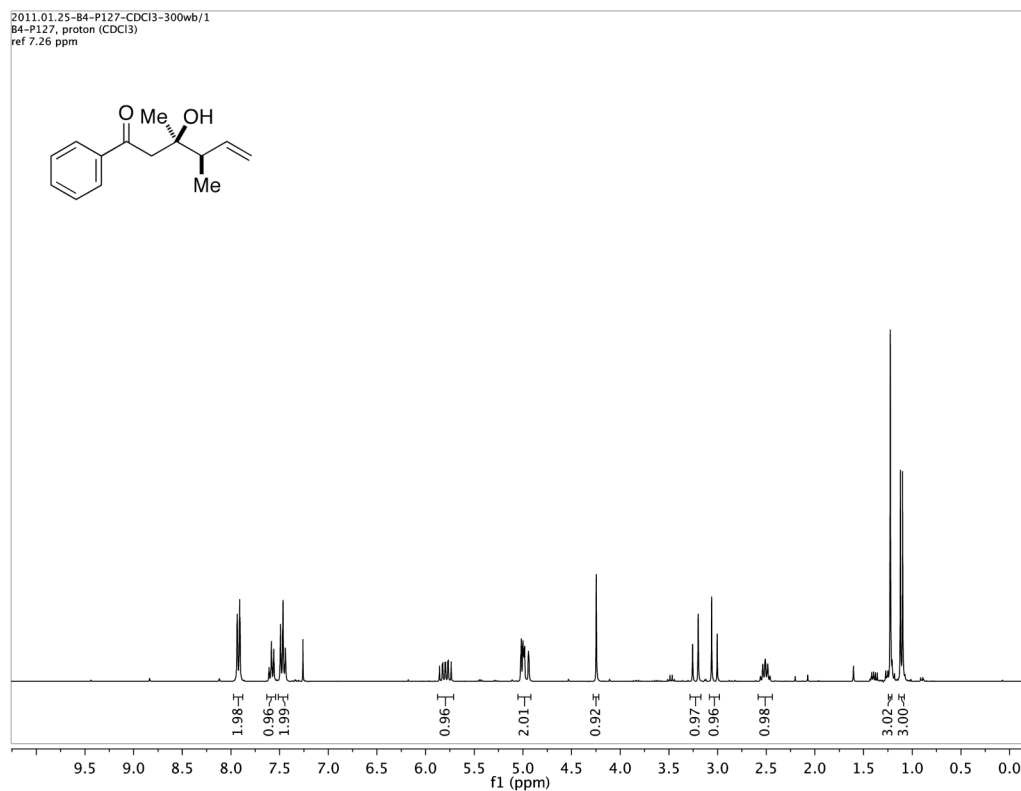

**Supplementary Figure 67** |  $^1\text{H}$  NMR spectrum of compound **23**.

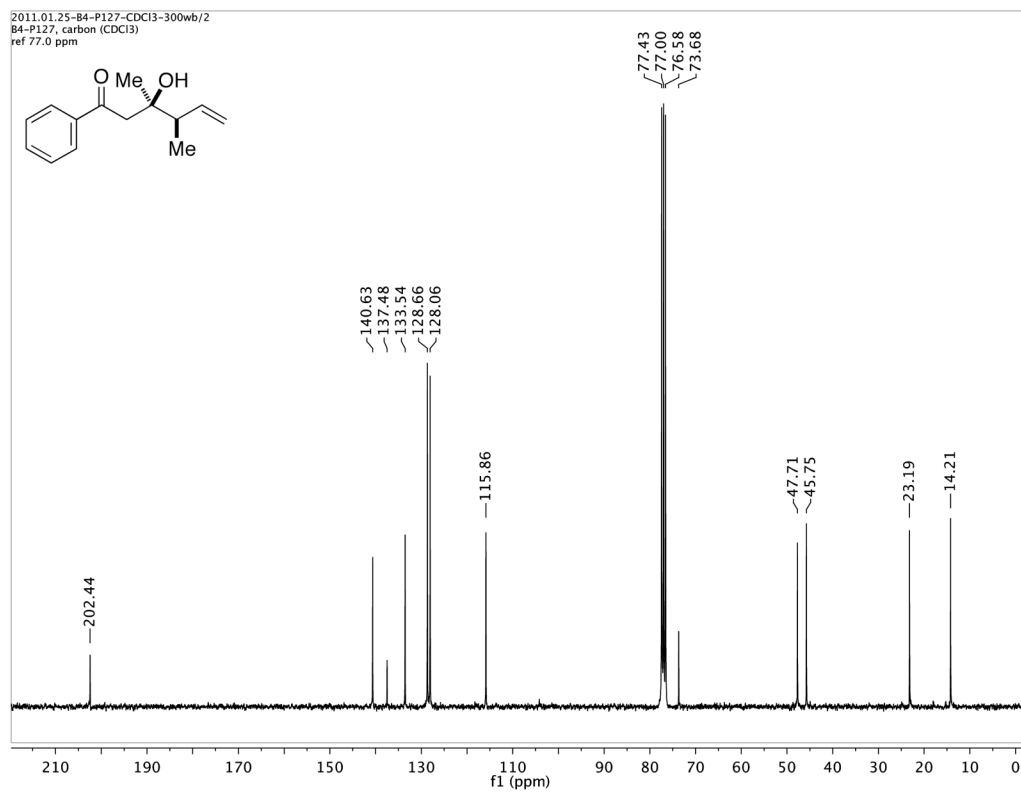

**Supplementary Figure 68** |  $^{13}\text{C}$  NMR spectrum of compound **23**.

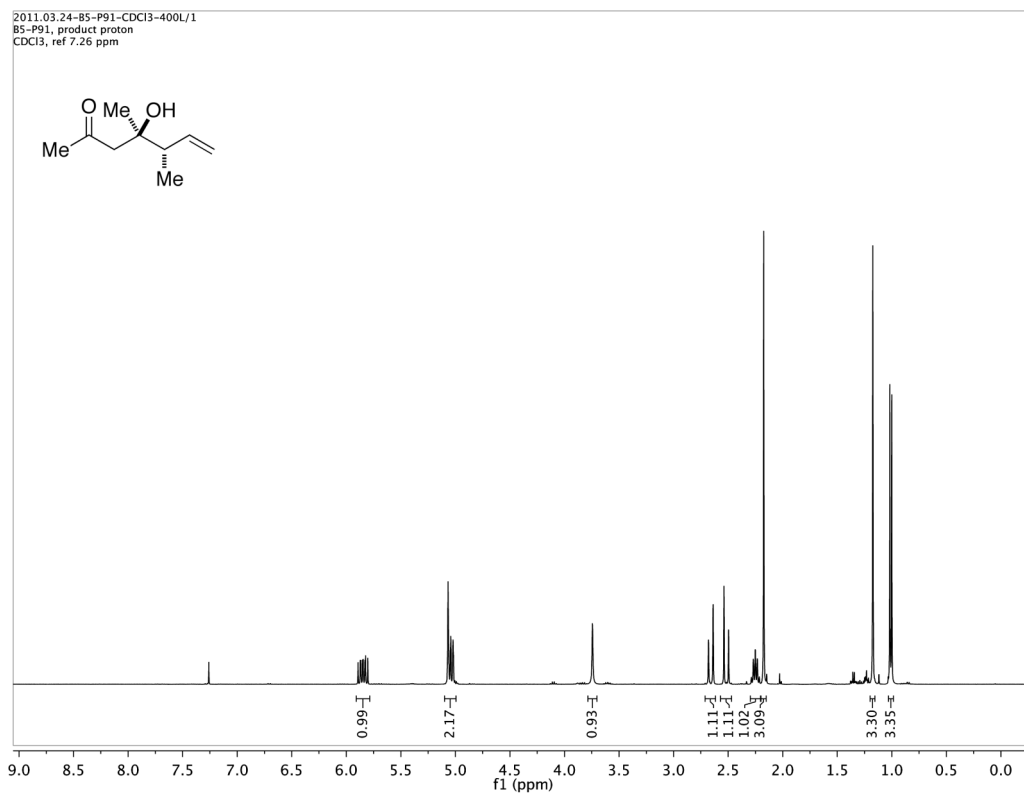

Supplementary Figure 69 |  $^1\text{H}$  NMR spectrum of compound **25**.

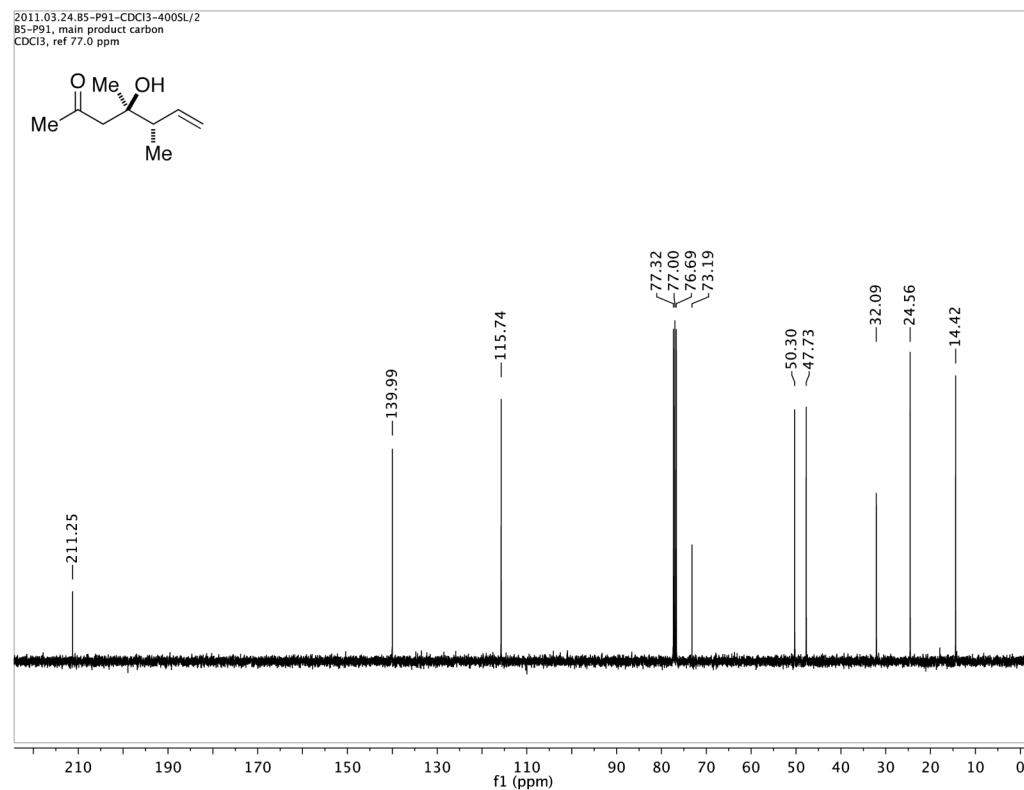

Supplementary Figure 70 |  $^{13}\text{C}$  NMR spectrum of compound **25**.

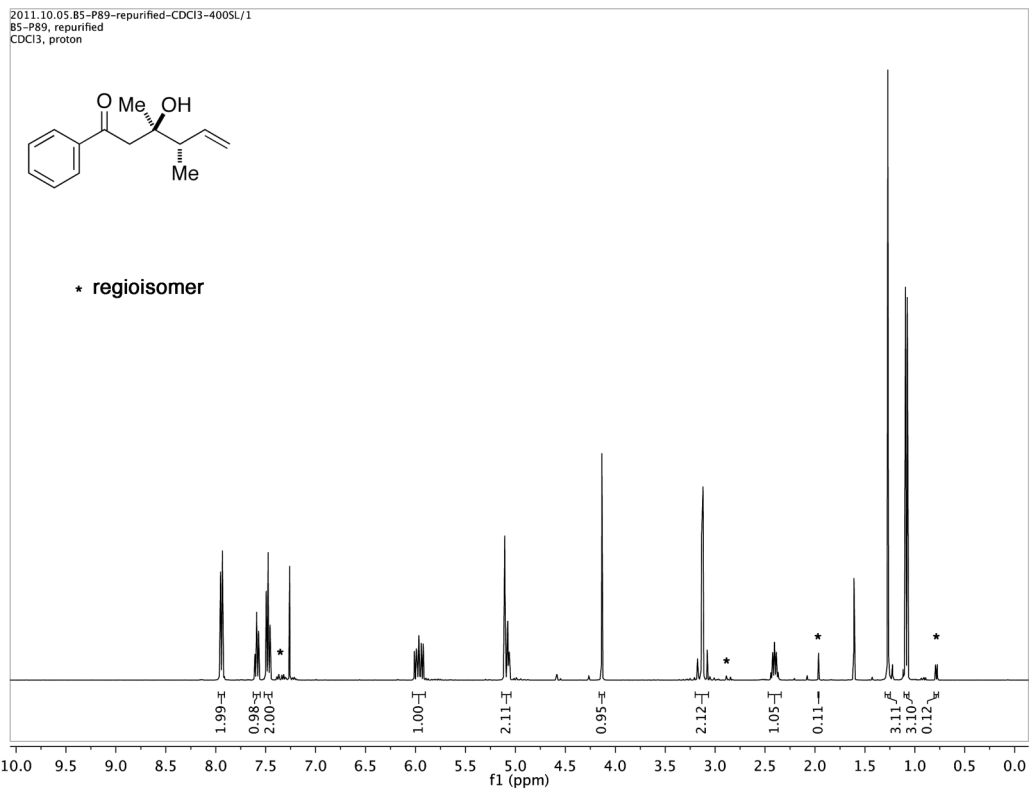

Supplementary Figure 71 |  $^1\text{H}$  NMR spectrum of compound 26.

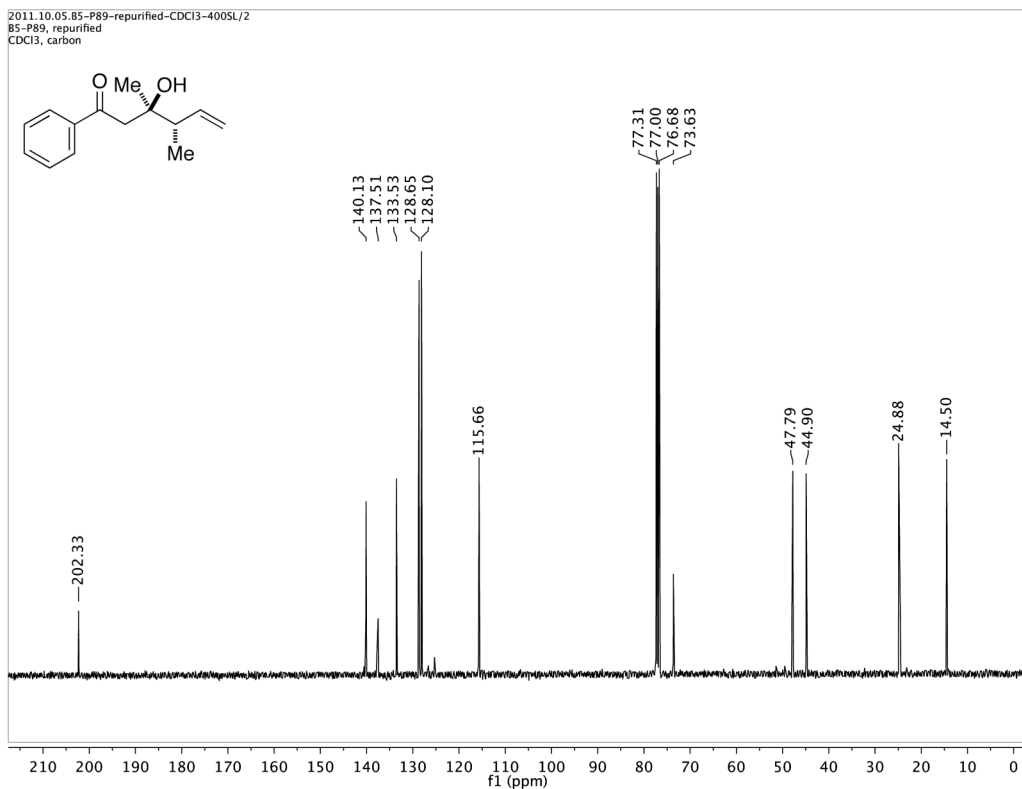

Supplementary Figure 72 |  $^{13}\text{C}$  NMR spectrum of compound 26.

2011.01.11-84-P157-pdt-CDCl3-300wb/1  
B4-P157, major product (CDCl3)  
ref 7.26 ppm

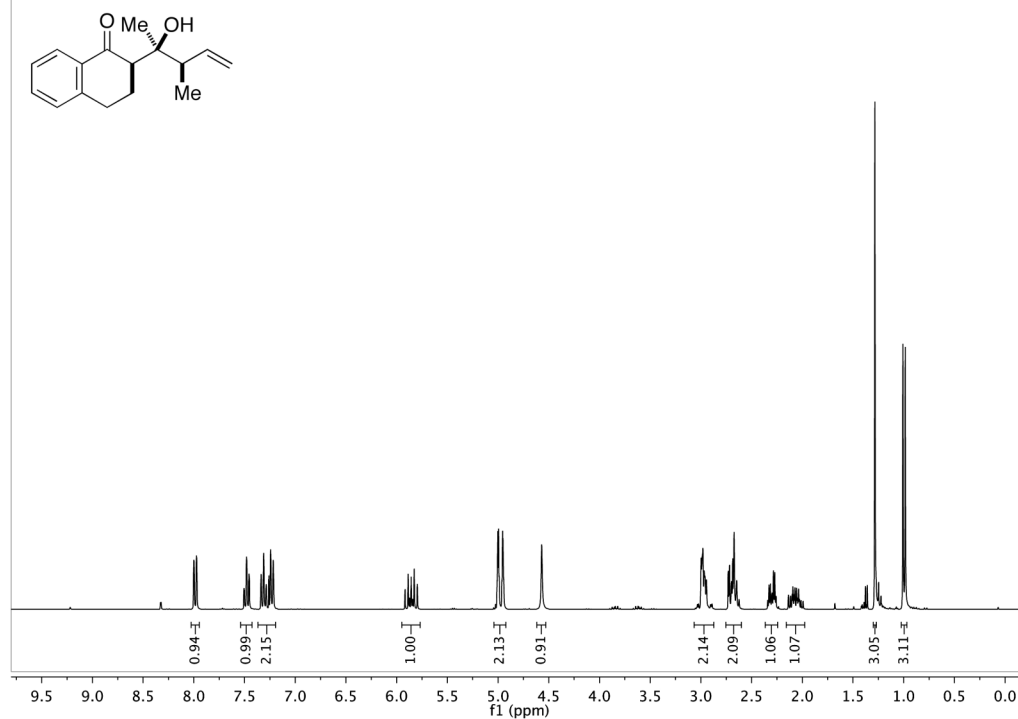

Supplementary Figure 73 | <sup>1</sup>H NMR spectrum of compound 29a.

2011.01.11-84-P157-pdt-CDCl3-300wb/2  
B4-P157 - major product (CDCl3)  
carbon, ref 77.0 ppm

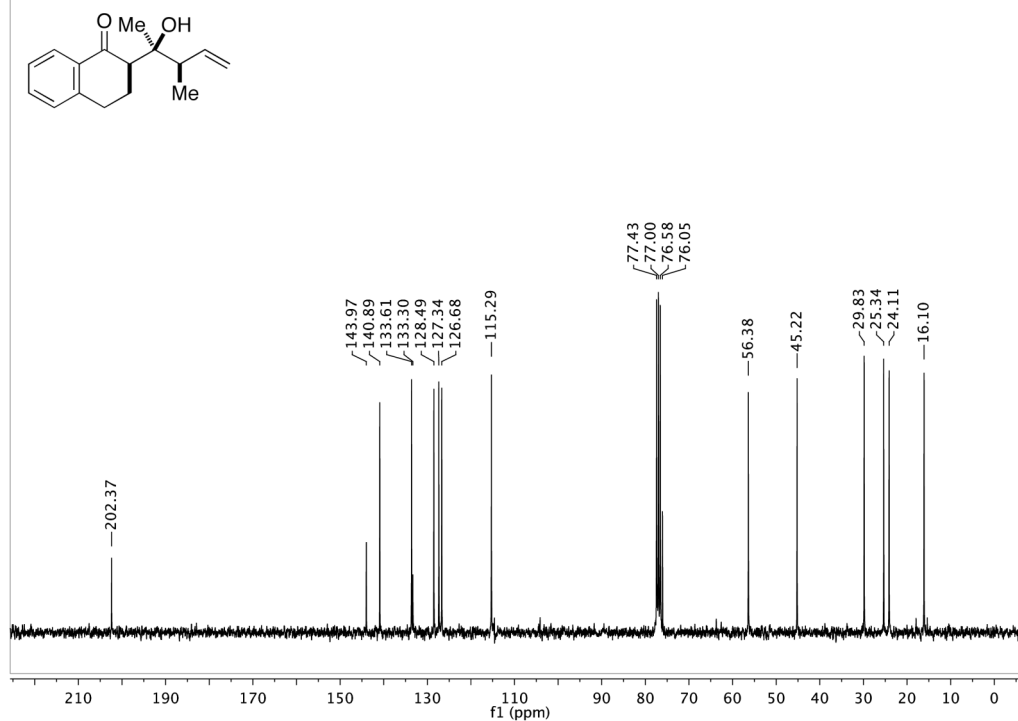

Supplementary Figure 74 | <sup>13</sup>C NMR spectrum of compound 29a.

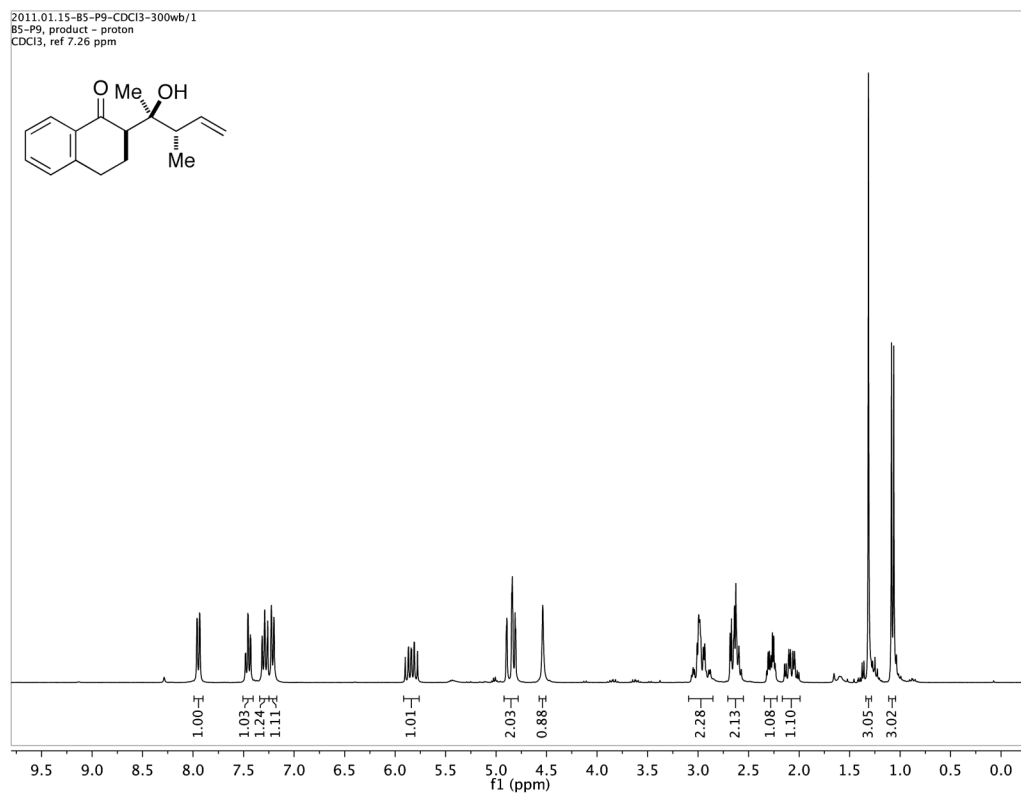

Supplementary Figure 75 |  $^1\text{H}$  NMR spectrum of compound 30a.

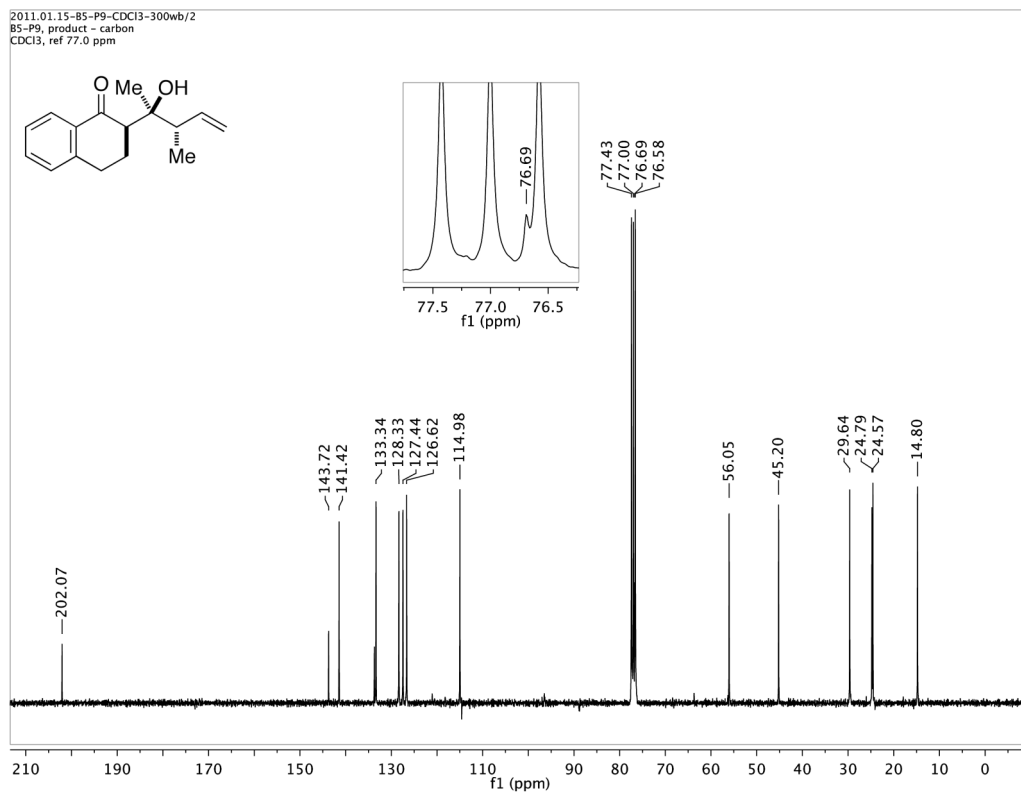

Supplementary Figure 76 |  $^{13}\text{C}$  NMR spectrum of compound 30a.

2011.02.17-85-P43-CDCl3-300nb/1  
85-P43, pdt  
CDCl3, ref 7.26 ppm

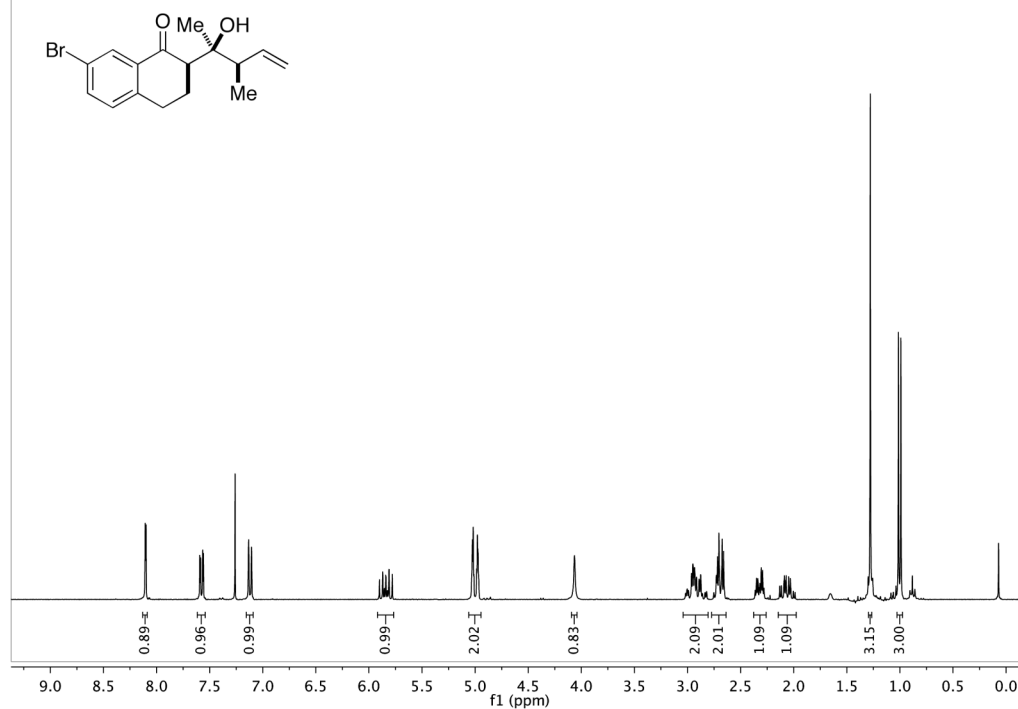

Supplementary Figure 77 |  $^1\text{H NMR}$  spectrum of compound S1.

2011.02.25.85-P43-CDCl3-4005L/2  
85-P43, product  
carbon, CDCl3, ref 77.0 ppm

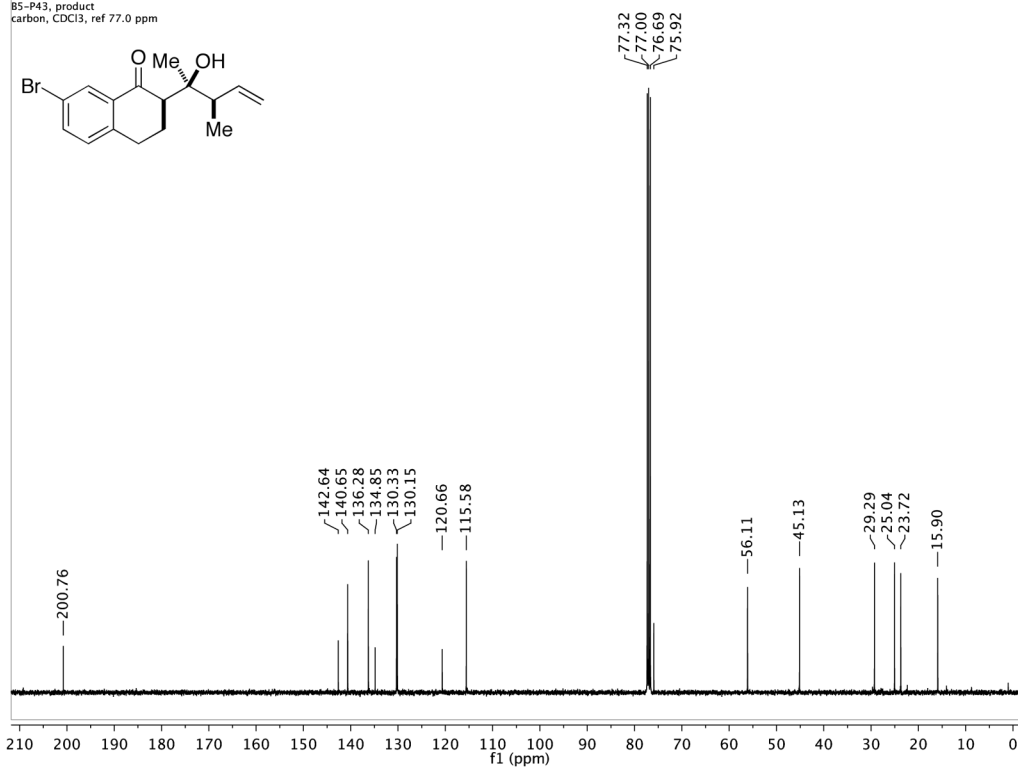

Supplementary Figure 78 |  $^{13}\text{C NMR}$  spectrum of compound S1.

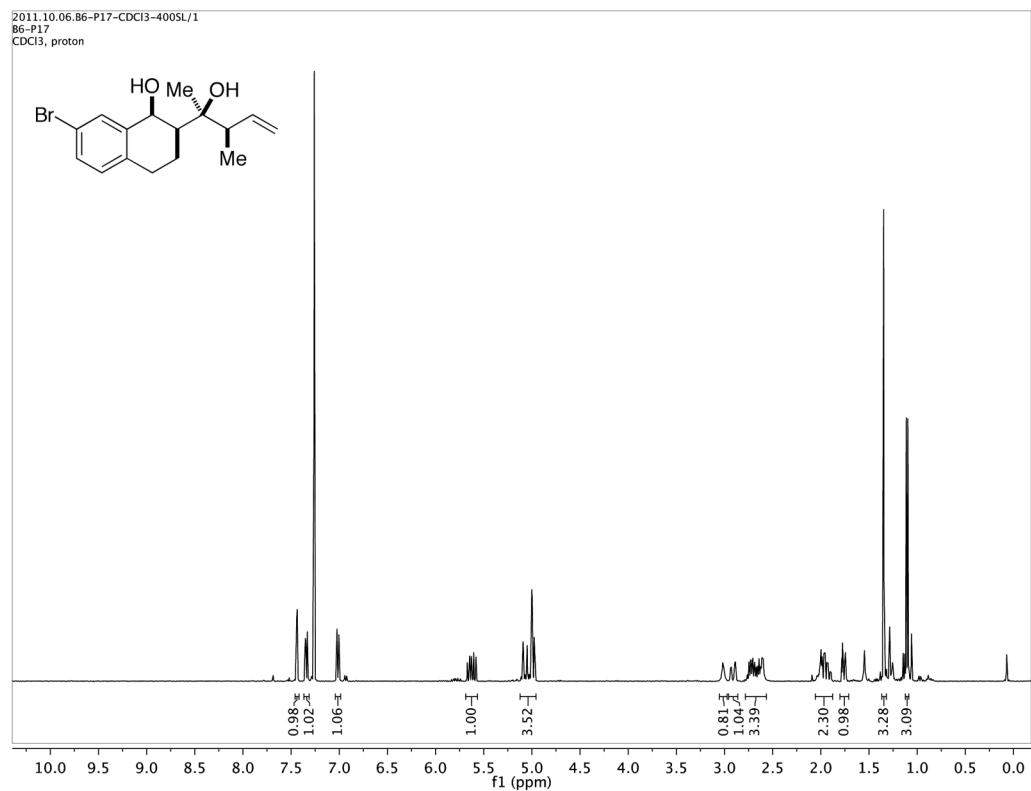

Supplementary Figure 79 |  $^1\text{H}$  NMR spectrum of compound S2.

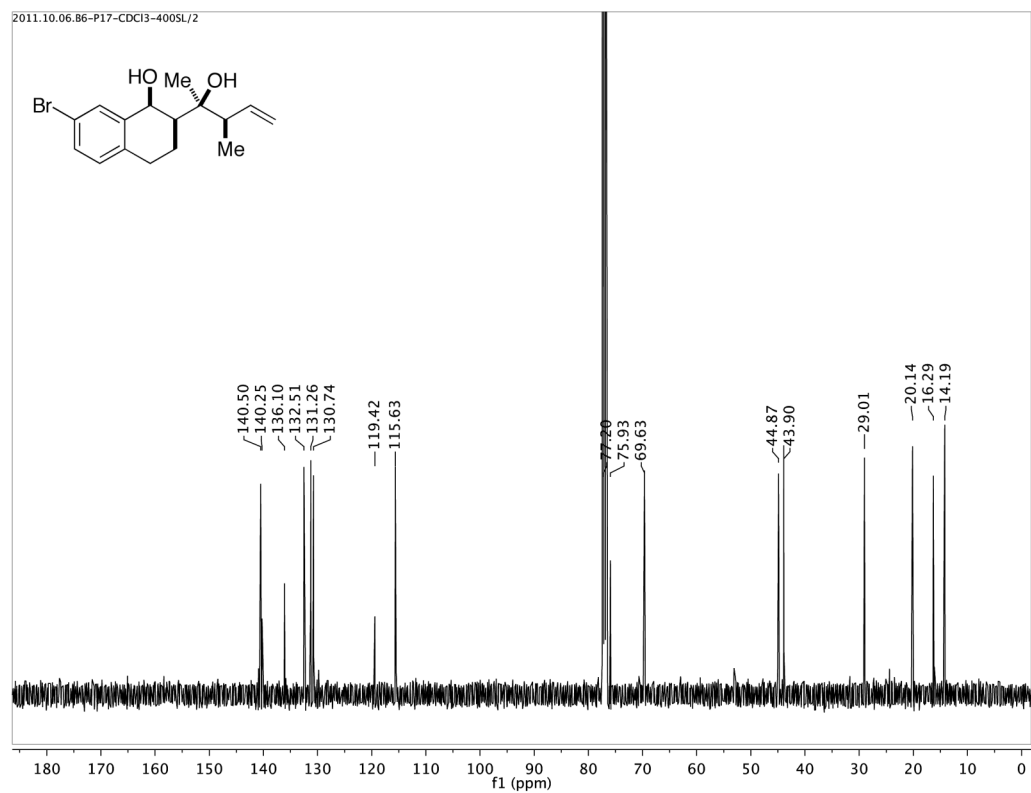

Supplementary Figure 80 |  $^{13}\text{C}$  NMR spectrum of compound S2.
